# Supplementary material for: Dual reactivity of B(C6F5)3 enables the silylative cascade conversion of N-aryl piperidines to sila-N-heterocycles: DFT calculations
Source: Royal Society of Chemistry journal article supplement (doi:10.1039/c9qo01437c), 2020-01-01
Supplement: c9qo01437c2.pdf [file c9qo01437c2.pdf]

# Dual reactivity of $B(C_6F_5)_3$ enables the silylative cascade conversion of N-aryl-piperidines to sila-N-heterocycles: DFT calculations

Miaomiao Zhou,<sup>a</sup> Sehoon Park,<sup>\*b,c</sup> and Li Dang<sup>\*,a</sup>

<sup>a</sup>Department of Chemistry and Key Laboratory for Preparation and Application of Ordered Structural Materials of Guangdong Province, Shantou University, Guangdong 515063, P. R. China

<sup>b</sup>Department of Chemistry, Guangdong Technion Israel Institute of Technology, Shantou 515063, China

<sup>c</sup>Technion-Israel Institute of Technology, Technion City, 32000 Haifa, Israel

\*E-mail: [sehoon.park@gtiit.edu.cn](mailto:sehoon.park@gtiit.edu.cn); [ldang@stu.edu.cn](mailto:ldang@stu.edu.cn)

## Table of Contents

|                                                                                                                                                                     |     |
|---------------------------------------------------------------------------------------------------------------------------------------------------------------------|-----|
| Text S1. <b>Computational details</b> -----                                                                                                                         | S2  |
| Figure S1 Energy profile for enamine ( <b>I</b> ) formation by intermediate <b>K</b> as a hydrogen acceptor-----                                                    | S3  |
| Figure S2 Energy profile for enamine ( <b>I</b> ) formation by intermediate <b>J</b> as a hydrogen acceptor-----                                                    | S4  |
| Figure S3. The formation of <b>A'</b> from <b>B</b> + PhMeSiH <sub>2</sub> + <b>H</b> -----                                                                         | S5  |
| Table S1. Relative energies of <b>A'</b> and <b>TS</b> <sub>4</sub> calculated by different DFT methods-----                                                        | S6  |
| Table S2. $\Delta E_{\text{gas}}$ , $\Delta G_{\text{gas}}$ , $\Delta E_{\text{sol}}$ , $\Delta G_{\text{sol}}$ calculated for species in the <b>Figure 1</b> ----- | S6  |
| Table S3. $\Delta E_{\text{gas}}$ , $\Delta G_{\text{gas}}$ , $\Delta E_{\text{sol}}$ calculated for species in the <b>Figure 2</b> -----                           | S7  |
| Table S4. $\Delta E_{\text{gas}}$ , $\Delta G_{\text{gas}}$ , $\Delta E_{\text{sol}}$ calculated for species in the <b>Figure 3</b> -----                           | S8  |
| Table S5. $\Delta E_{\text{gas}}$ , $\Delta G_{\text{gas}}$ , $\Delta E_{\text{sol}}$ calculated for species in the <b>Figure 4</b> -----                           | S9  |
| Table S6. $\Delta E_{\text{gas}}$ , $\Delta G_{\text{gas}}$ , $\Delta E_{\text{sol}}$ calculated for species in the <b>Figure 5</b> -----                           | S10 |
| Table S7. $\Delta E_{\text{gas}}$ , $\Delta G_{\text{gas}}$ , $\Delta E_{\text{sol}}$ calculated for species in the <b>Figure S1</b> -----                          | S11 |
| Table S8. $\Delta E_{\text{gas}}$ , $\Delta G_{\text{gas}}$ , $\Delta E_{\text{sol}}$ calculated for species in the <b>Figure S2</b> -----                          | S12 |
| Figure S4. The energy, and $(C_6F_5)_3B-H$ (hydride) and $(C_6F_5)_3B-HSi(R)MePh$ distances along IRC of <b>TS7</b> -----                                           | S12 |
| Cartesian coordinates and structures -----                                                                                                                          | S13 |
| <b>Reference</b> -----                                                                                                                                              | S67 |

## Computational Details

Gaussian 16<sup>1</sup> was used for all calculations in this work. Geometric structural optimization and frequency calculation were conducted by B3LYP<sup>2</sup> functional in gas phase at T = 298.15 K and 1 atm. The all-electron basis set 6-31G\*\* was used in describing the atoms (B, C, H, O, N, F).<sup>3</sup> There is no imaginary frequency for all the intermediates, while only-one imaginary frequency is in the structure of transition states. In addition, the intrinsic reaction coordinate (IRC) calculation<sup>4</sup> which correctly bridges the intermediates, further demonstrates the credibility of transition state structures. Based on the gas-phase optimized geometries, solvation effect of benzene was incorporated with the SMD<sup>5</sup> model at the level of B3LYP-D3<sup>6</sup> while 6-311++G\*\* basis set for all main group atoms.<sup>3</sup> All 3D molecular structures were generated by using the CYLview (Version) program.<sup>7</sup> Geometric structural optimization and frequency calculation in benzene as the solvent were conducted for a series of species shown in Figure 1 by using B3LYP functional and 3-21G (opt1), 6-31G (opt2) for all atoms in these calculations. The results were listed in Table

S2.

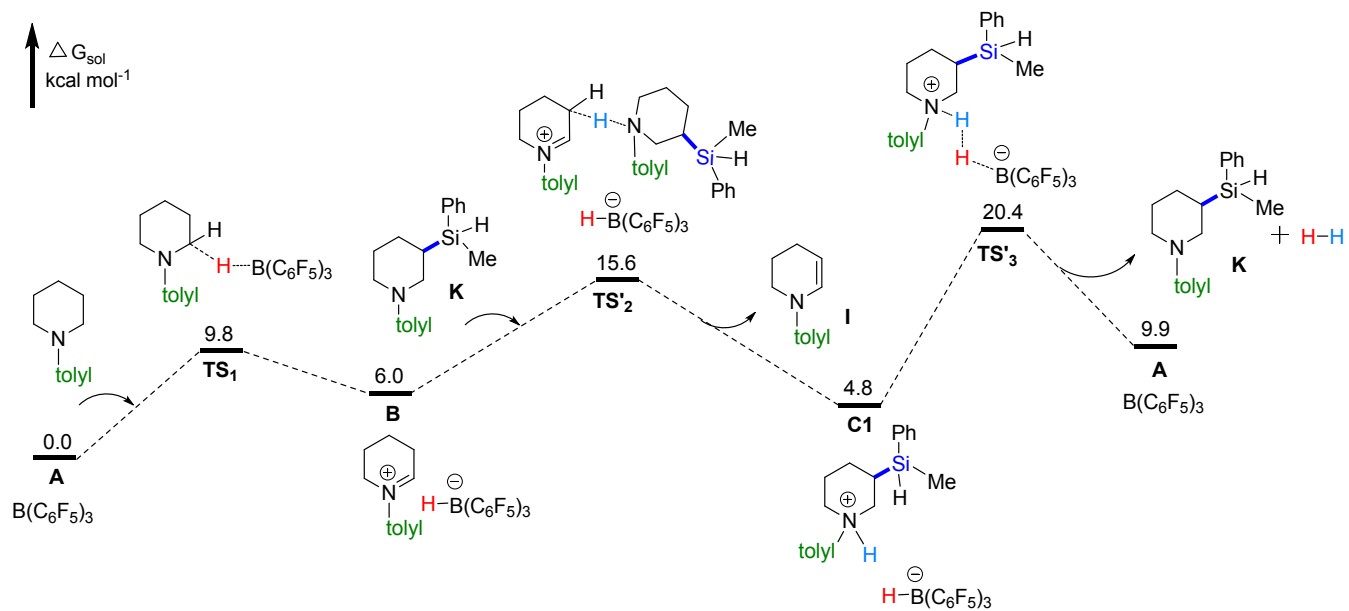

**Figure S1.** Energy profile for enamine (**I**) formation by intermediate **K** as a hydrogen acceptor.

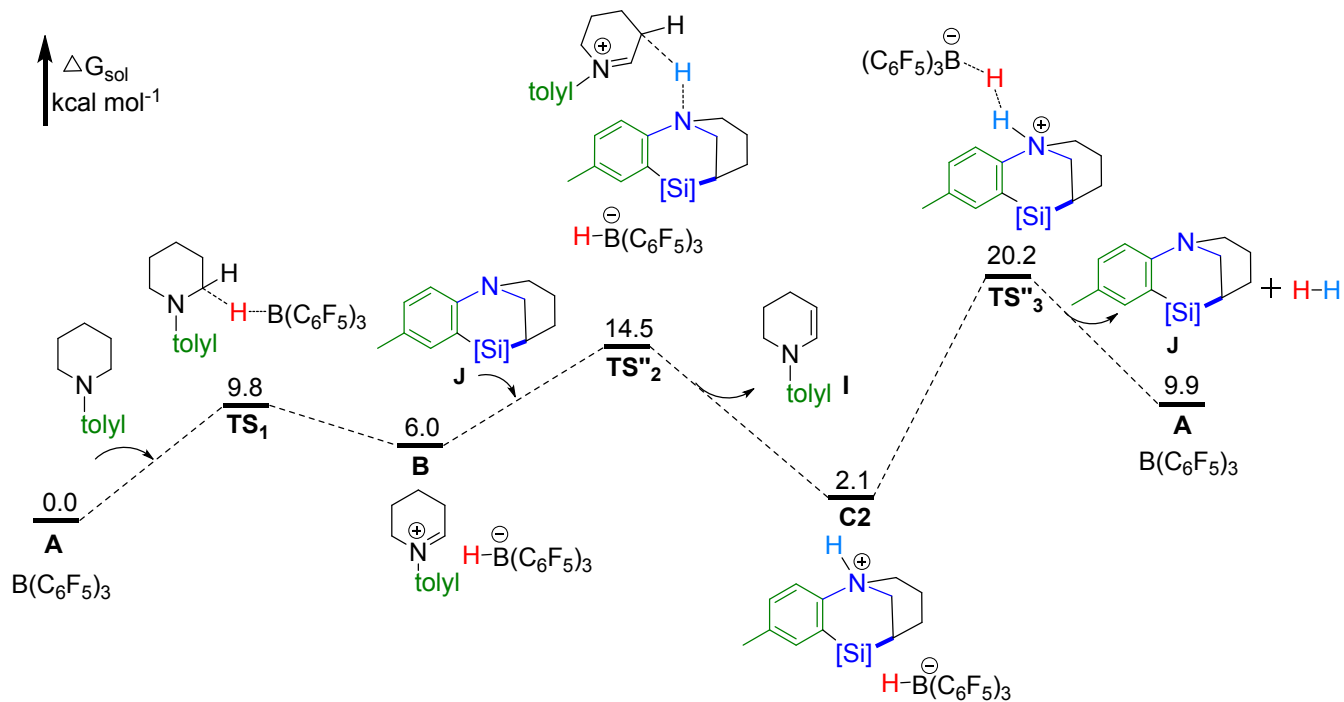

**Figure S2.** Energy profile for enamine (**I**) formation by intermediate **J** as a hydrogen acceptor.

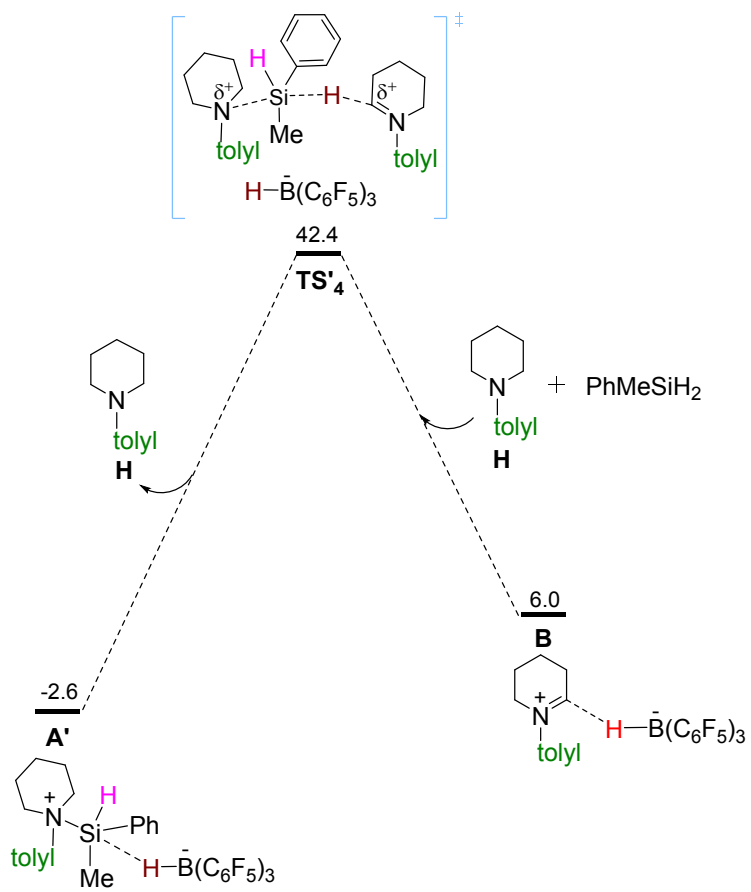

**Figure S3.** The formation of **A'** from **B** + PhMeSiH<sub>2</sub> + **H** via **TS'**<sub>4</sub>.

**Table S1.** Calculated relative energies of **A'** and **TS<sub>4</sub>** by different DFT methods.

| DFT Methods | Species               | $\Delta E_{\text{gas}}$ | $\Delta G_{\text{gas}}$ | $\Delta E_{\text{sol}}$ | $\Delta G_{\text{sol}}$ |
|-------------|-----------------------|-------------------------|-------------------------|-------------------------|-------------------------|
| B3LYP       | <b>A'</b>             | -0.93                   | 30.58                   | -34.09                  | -2.58                   |
|             | <b>TS<sub>4</sub></b> | 30.54                   | 61.95                   | 0.57                    | 31.98                   |
| WB97XD      | <b>A'</b>             | -33.89                  | -1.07                   | -34.12                  | -1.0                    |
|             | <b>TS<sub>4</sub></b> | 28.85                   | 29.08                   | -0.67                   | 33.46                   |
| M062X       | <b>A'</b>             | -32.01                  | -1.63                   | -34.47                  | -4.09                   |
|             | <b>TS<sub>4</sub></b> | -4.41                   | 27.62                   | -1.11                   | 30.92                   |
| BP86        | <b>A'</b>             | -1.16                   | 29.08                   | -34.23                  | -4.14                   |
|             | <b>TS<sub>4</sub></b> | 26.58                   | 58.52                   | 0.84                    | 32.78                   |

**Table S2.** The  $\Delta E_{\text{gas}}$ ,  $\Delta G_{\text{gas}}$  and  $\Delta E_{\text{sol}}$  calculated for species in the **Fig. 1**.

| Species               | $\Delta G_{\text{gas}}$ | $\Delta E_{\text{gas}}$ | $\Delta E_{\text{sol}}$ | $\Delta G_{\text{sol-opt1}}$ | $\Delta G_{\text{sol-opt2}}$ |
|-----------------------|-------------------------|-------------------------|-------------------------|------------------------------|------------------------------|
| <b>A</b>              | 0                       | 0                       | 0                       | 0                            | 0                            |
| <b>TS<sub>1</sub></b> | 26.26                   | 12.96                   | -3.45                   | 12.4                         | 27.5                         |
| <b>TS<sub>5</sub></b> | 62.00                   | 34.55                   | 6.22                    |                              |                              |
| <b>B</b>              | 24.29                   | 12.32                   | -6.01                   | 11.2                         | 20.8                         |
| <b>TS<sub>2</sub></b> | 42.13                   | 16.64                   | -6.14                   | 14.2                         | 42.0                         |
| <b>C</b>              | 24.92                   | 10.56                   | -8.08                   | 7.3                          | 23.4                         |
| <b>TS<sub>3</sub></b> | 44.45                   | 30.94                   | 18.22                   |                              |                              |
| <b>D</b>              | 7.25                    | -3.67                   | -6.21                   | -2.5                         | 8.3                          |
| <b>TS<sub>4</sub></b> | 61.95                   | 30.54                   | 0.57                    | 37.0                         | 33.9                         |
| <b>A'</b>             | 30.58                   | -0.93                   | -34.09                  | 2.0                          | 21.0                         |
| <b>A</b>              | 10.39                   | 26.62                   | 25.16                   |                              |                              |

**Table S3.** The  $\Delta E_{\text{gas}}$ ,  $\Delta G_{\text{gas}}$  and  $\Delta E_{\text{sol}}$  calculated for species in the **Fig. 2**.

| <b>Species</b>        | <b><math>\Delta G_{\text{gas}}</math></b> | <b><math>\Delta E_{\text{gas}}</math></b> | <b><math>\Delta E_{\text{sol}}</math></b> |
|-----------------------|-------------------------------------------|-------------------------------------------|-------------------------------------------|
| <b>A</b>              | 0                                         | 0                                         | 0                                         |
| <b>D</b>              | 7.62                                      | -3.93                                     | -7.28                                     |
| <b>TS<sub>6</sub></b> | 50.49                                     | 20.32                                     | -3.30                                     |
| <b>E</b>              | 18.82                                     | -10.79                                    | -34.83                                    |
| <b>TS<sub>7</sub></b> | 27.84                                     | -1.81                                     | -24.94                                    |
| <b>F</b>              | 11.57                                     | -17.19                                    | -31.99                                    |
| <b>TS<sub>8</sub></b> | 41.26                                     | 5.27                                      | -27.31                                    |
| <b>G</b>              | 33.70                                     | -2.12                                     | -29.98                                    |
| <b>TS<sub>9</sub></b> | 53.97                                     | 22.80                                     | -17.70                                    |
| <b>A</b>              | 5.49                                      | -1.46                                     | -7.83                                     |

**Table S4.** The  $\Delta E_{\text{gas}}$ ,  $\Delta G_{\text{gas}}$  and  $\Delta E_{\text{sol}}$  calculated for species in the **Fig. 3**.

| <b>Species</b>           | <b><math>\Delta G_{\text{gas}}</math></b> | <b><math>\Delta E_{\text{gas}}</math></b> | <b><math>\Delta E_{\text{sol}}</math></b> |
|--------------------------|-------------------------------------------|-------------------------------------------|-------------------------------------------|
| <b>A</b>                 | 0                                         | 0                                         | 0                                         |
| <b>TS<sub>8</sub></b>    | 40.00                                     | 19.61                                     | -8.36                                     |
| <b>TS'<sub>8</sub></b>   | 45.82                                     | 26.99                                     | 5.44                                      |
| <b>TS''<sub>8</sub></b>  | 47.06                                     | 27.56                                     | 0.44                                      |
| <b>TS'''<sub>8</sub></b> | 35.69                                     | 15.47                                     | -11.75                                    |
| <b>G</b>                 | 32.43                                     | 12.22                                     | -11.03                                    |
| <b>G1</b>                | 43.22                                     | 23.33                                     | -0.50                                     |
| <b>G2</b>                | 43.06                                     | 24.60                                     | 0.63                                      |
| <b>G3</b>                | 22.61                                     | 2.95                                      | -18.2                                     |
| <b>TS<sub>9</sub></b>    | 52.70                                     | 37.13                                     | 1.25                                      |
| <b>TS'<sub>9</sub></b>   | 44.28                                     | 30.72                                     | 10.51                                     |
| <b>TS''<sub>9</sub></b>  | 55.79                                     | 41.41                                     | 18.88                                     |
| <b>TS'''<sub>9</sub></b> | 40.28                                     | 24.16                                     | 3.26                                      |
| <b>J</b>                 | 4.22                                      | 12.88                                     | 11.12                                     |
| <b>J1</b>                | 2.01                                      | 11.60                                     | 9.35                                      |
| <b>J2</b>                | 9.08                                      | 18.70                                     | 16.74                                     |
| <b>J3</b>                | -2.84                                     | 6.85                                      | 6.09                                      |



**Table S5.** The  $\Delta E_{\text{gas}}$ ,  $\Delta G_{\text{gas}}$  and  $\Delta E_{\text{sol}}$  calculated for species in the **Fig. 4**.

| Species                | $\Delta G_{\text{gas}}$ | $\Delta E_{\text{gas}}$ | $\Delta E_{\text{sol}}$ |
|------------------------|-------------------------|-------------------------|-------------------------|
| <b>A</b>               | 0                       | 0                       | 0                       |
| <b>TS<sub>10</sub></b> | 29.91                   | 12.17                   | -10.24                  |
| <b>M</b>               | 18.16                   | 3.02                    | -13.24                  |
| <b>TS<sub>11</sub></b> | 26.01                   | 13.71                   | -1.70                   |
| <b>A</b>               | -11.09                  | -0.15                   | 2.68                    |

**Table S6.** The  $\Delta E_{\text{gas}}$ ,  $\Delta G_{\text{gas}}$  and  $\Delta E_{\text{sol}}$  calculated for species in the **Fig. 5**.

| Species                | $\Delta G_{\text{gas}}$ | $\Delta E_{\text{gas}}$ | $\Delta E_{\text{sol}}$ |
|------------------------|-------------------------|-------------------------|-------------------------|
| <b>A</b>               | 0                       | 0                       | 0                       |
| <b>TS<sub>12</sub></b> | 16.98                   | 1.19                    | -8.81                   |
| <b>O</b>               | 10.27                   | -6.36                   | -20.44                  |
| <b>TS<sub>13</sub></b> | 29.02                   | -4.68                   | -25.03                  |
| <b>P</b>               | 10.33                   | -8.25                   | -11.21                  |
| <b>TS<sub>14</sub></b> | 0.20                    | -32.36                  | -2.40                   |
| <b>R</b>               | -10.39                  | -9.58                   | -5.16                   |
| <b>B</b>               | -61.18                  | -74.48                  | -35.16                  |
| <b>TS<sub>15</sub></b> | -57.20                  | -71.86                  | -30.44                  |
| <b>A</b>               | -85.47                  | -86.80                  | -29.15                  |

**Table S7.** The  $\Delta E_{\text{gas}}$ ,  $\Delta G_{\text{gas}}$  and  $\Delta E_{\text{sol}}$  calculated for species in the **Fig. S1**.

| <b>Species</b>        | <b><math>\Delta G_{\text{gas}}</math></b> | <b><math>\Delta E_{\text{gas}}</math></b> | <b><math>\Delta E_{\text{sol}}</math></b> |
|-----------------------|-------------------------------------------|-------------------------------------------|-------------------------------------------|
| <b>A</b>              | 0                                         | 0                                         | 0                                         |
| <b>TS<sub>1</sub></b> | 26.26                                     | 12.96                                     | -3.45                                     |
| <b>B</b>              | 24.29                                     | 12.32                                     | -6.01                                     |
| <b>TS'2</b>           | 39.72                                     | 12.94                                     | -10.75                                    |
| <b>C1</b>             | 22.47                                     | 8.14                                      | -9.51                                     |
| <b>TS'3</b>           | 24.35                                     | 19.51                                     | 15.57                                     |
| <b>A</b>              | 10.39                                     | 26.62                                     | 25.16                                     |

**Table S8.** The  $\Delta E_{\text{gas}}$ ,  $\Delta G_{\text{gas}}$  and  $\Delta E_{\text{sol}}$  calculated for species in the **Fig. S2**.

| Species           | $\Delta G_{\text{gas}}$ | $\Delta E_{\text{gas}}$ | $\Delta E_{\text{sol}}$ |
|-------------------|-------------------------|-------------------------|-------------------------|
| A                 | 0                       | 0                       | 0                       |
| TS <sub>1</sub>   | 26.26                   | 12.96                   | -3.45                   |
| B                 | 24.29                   | 12.32                   | -6.01                   |
| TS'' <sub>2</sub> | 36.58                   | 13.26                   | -8.80                   |
| C2                | 19.24                   | 4.88                    | -12.20                  |
| TS'' <sub>3</sub> | 24.90                   | 21.96                   | 17.30                   |
| A                 | 10.39                   | 26.62                   | 25.16                   |

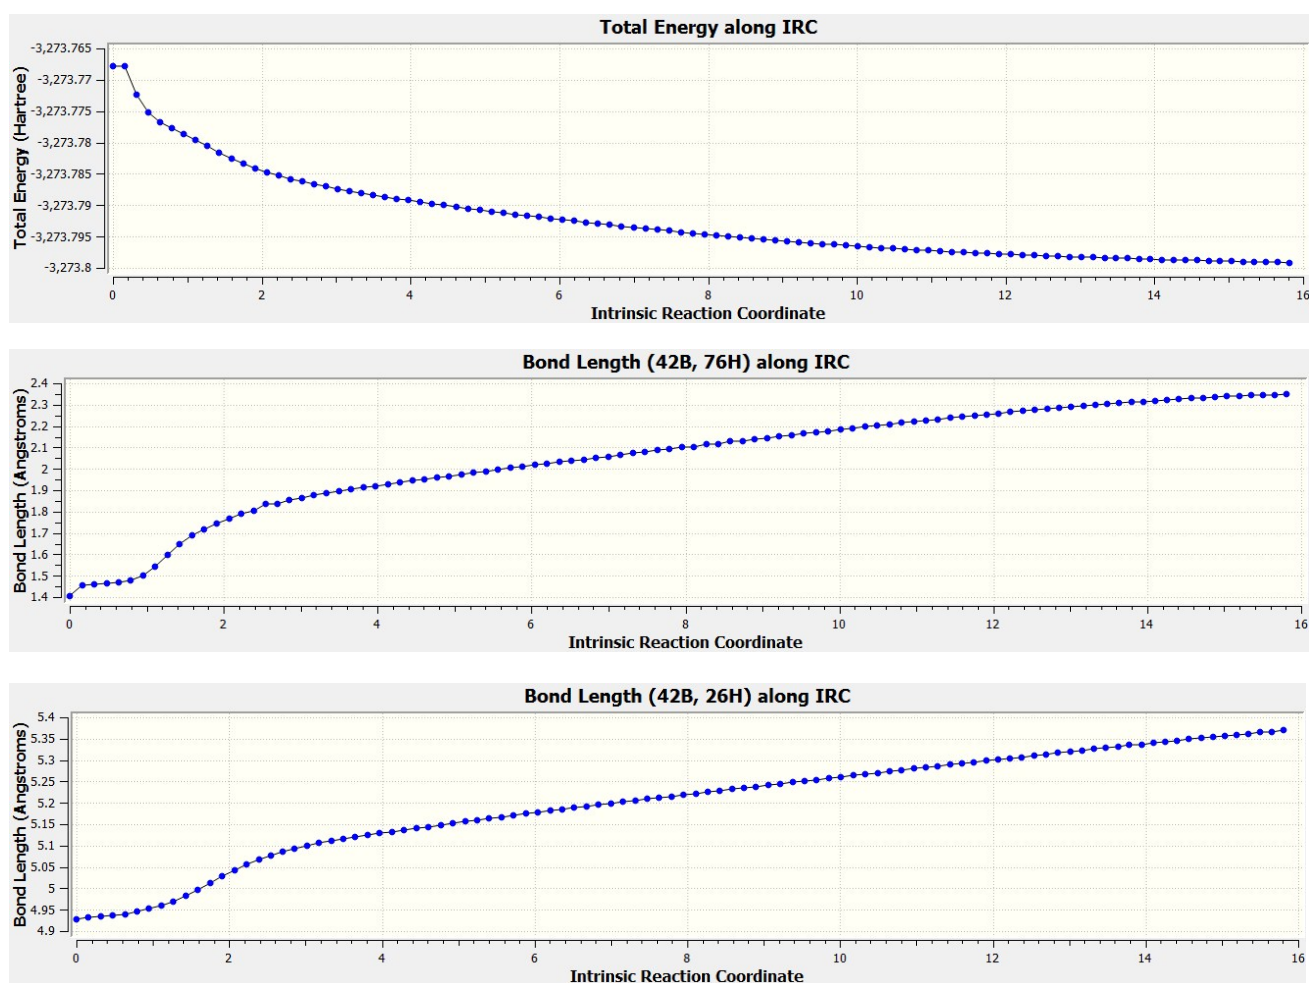

Figure S4. The energy, and  $(\text{C}_6\text{F}_5)_3\text{B}-\text{H}$  (hydride) and  $(\text{C}_6\text{F}_5)_3\text{B}-\text{HSi}(\text{R})\text{MePh}$  distances along the IRC of TS<sub>7</sub>.

## Cartesian coordinates and structures of all the compounds optimized in this study

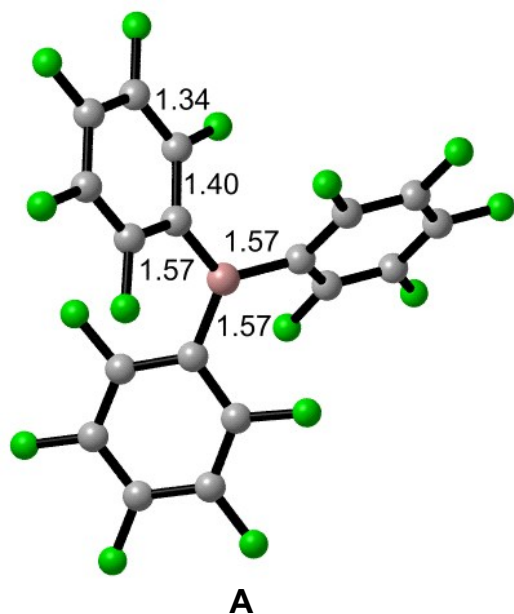

$G_{\text{gas}} = -2208.113272 \text{ a.u.}$

$E_{\text{gas}} = -2208.20630331 \text{ a.u.}$

|   |             |             |             |
|---|-------------|-------------|-------------|
| B | 0.00045200  | 0.00022800  | 0.00002800  |
| C | -1.01179600 | 1.19903000  | 0.00007600  |
| C | -2.22317500 | 1.15822600  | 0.70865400  |
| C | -0.76932400 | 2.38663500  | -0.70840800 |
| C | -3.12750900 | 2.21391100  | 0.72882100  |
| C | -1.65922600 | 3.45451800  | -0.72844400 |
| C | -2.84392300 | 3.36740200  | 0.00015700  |
| C | 1.54491700  | 0.27702600  | 0.00003600  |
| C | 2.45180200  | -0.52757900 | -0.70809100 |
| C | 2.11586500  | 1.34650900  | 0.70813600  |
| C | 3.82170000  | -0.29164800 | -0.72815500 |
| C | 3.48242500  | 1.60108300  | 0.72820000  |
| C | 4.33916600  | 0.77788600  | 0.00001700  |
| C | -0.53213700 | -1.47567300 | -0.00004900 |
| C | -1.68222100 | -1.85847100 | -0.70845100 |
| C | 0.10811300  | -2.50487700 | 0.70839900  |
| C | -2.16301000 | -3.16274800 | -0.72879500 |
| C | -0.35489200 | -3.81558200 | 0.72826800  |
| C | -1.49590500 | -4.14577900 | -0.00041200 |
| F | 0.35074000  | 2.52290900  | -1.43675300 |
| F | -1.39077400 | 4.55747300  | -1.43406100 |
| F | -3.70328700 | 4.38449900  | 0.00020000  |
| F | -4.25970700 | 2.13338300  | 1.43459600  |
| F | -2.54427700 | 0.07672400  | 1.43726100  |
| F | 1.34020100  | 2.16645600  | 1.43590200  |
| F | 3.97934500  | 2.62203400  | 1.43331700  |
| F | 5.64978800  | 1.01295300  | -0.00013100 |
| F | 4.64225900  | -1.07639300 | -1.43336800 |
| F | 2.00934800  | -1.56567100 | -1.43624800 |

|   |             |             |             |
|---|-------------|-------------|-------------|
| F | -2.35976900 | -0.95577600 | -1.43628900 |
| F | 1.20568100  | -2.24314000 | 1.43674400  |
| F | 0.28034200  | -4.75645700 | 1.43376100  |
| F | -1.94796700 | -5.39823500 | -0.00058000 |
| F | -3.25275300 | -3.48079600 | -1.43433600 |

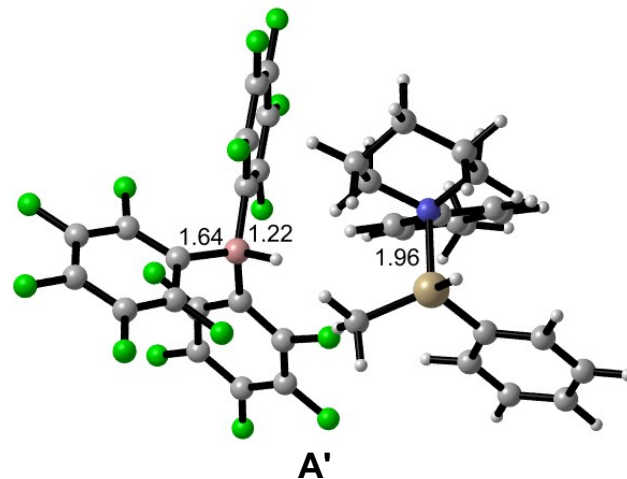

$G_{\text{gas}} = -3292.285791 \text{ a.u.}$

$E_{\text{gas}} = -3292.76589819 \text{ a.u.}$

|    |             |             |             |
|----|-------------|-------------|-------------|
| Si | 3.26549300  | 0.82234200  | 2.15002900  |
| H  | 3.91549500  | 1.85627100  | 2.98627100  |
| C  | 4.49675600  | -0.54011400 | 1.85773900  |
| C  | 5.85664000  | -0.32040500 | 2.15347600  |
| C  | 4.10259500  | -1.82123400 | 1.41951700  |
| C  | 6.79786900  | -1.33889900 | 2.00079100  |
| H  | 6.18450200  | 0.64999200  | 2.51994600  |
| C  | 5.04414700  | -2.83860800 | 1.27195800  |
| H  | 3.06241100  | -2.03229500 | 1.18928300  |
| C  | 6.39052100  | -2.59844900 | 1.55815000  |
| H  | 7.84205200  | -1.15310700 | 2.23476300  |
| H  | 4.72513300  | -3.82078500 | 0.93643300  |
| H  | 7.11997000  | -3.39513600 | 1.44347300  |
| B  | -1.55957200 | -0.13309200 | 0.07043000  |
| C  | -1.54364900 | -1.76584600 | -0.10350900 |
| C  | -0.46247000 | -2.56455300 | 0.25888600  |
| C  | -2.65049000 | -2.48309200 | -0.56749400 |
| C  | -0.44958400 | -3.95607400 | 0.18288900  |
| C  | -2.69306900 | -3.87133000 | -0.66235300 |
| C  | -1.57975600 | -4.61746100 | -0.28143000 |
| C  | -1.52691200 | 0.72914400  | -1.32960400 |
| C  | -1.48001300 | 2.12536900  | -1.26513900 |
| C  | -1.45185800 | 0.22684000  | -2.62991700 |
| C  | -1.38794400 | 2.96661600  | -2.36871300 |
| C  | -1.36254700 | 1.02608900  | -3.77135700 |
| C  | -1.33930700 | 2.40941400  | -3.64347600 |

|   |             |             |             |
|---|-------------|-------------|-------------|
| C | -2.79286000 | 0.29368600  | 1.06371400  |
| C | -4.04156000 | 0.76291400  | 0.65125400  |
| C | -2.64406600 | 0.18296400  | 2.44771800  |
| C | -5.06517300 | 1.10814400  | 1.53323800  |
| C | -3.63611200 | 0.51465900  | 3.36700300  |
| C | -4.86167800 | 0.98211100  | 2.90342400  |
| F | -3.78675000 | -4.49975500 | -1.11955900 |
| F | -3.75206900 | -1.81824900 | -0.96708600 |
| F | -1.59662500 | -5.95540300 | -0.36739100 |
| F | 0.64102500  | -4.65559400 | 0.54805500  |
| F | 0.69719500  | -2.00136600 | 0.71630000  |
| F | -1.40963400 | -1.10773600 | -2.85978900 |
| F | -1.28475600 | 0.46917600  | -4.99083200 |
| F | -1.24562800 | 3.19511700  | -4.72630600 |
| F | -1.33016200 | 4.30226800  | -2.21652500 |
| F | -1.48119800 | 2.74026800  | -0.05096000 |
| F | -1.47598400 | -0.26707100 | 2.97291400  |
| F | -3.42273800 | 0.39075300  | 4.68933700  |
| F | -5.83389600 | 1.30892600  | 3.76813300  |
| F | -6.24395700 | 1.56037100  | 1.07527700  |
| F | -4.31437600 | 0.91767500  | -0.66056900 |
| H | -0.54048800 | 0.17319200  | 0.65938500  |
| C | 3.88113300  | 4.13403300  | 1.23736500  |
| H | 4.06976700  | 3.87741000  | 2.28429700  |
| H | 4.66280700  | 4.84532100  | 0.94671600  |
| C | 4.06816200  | 2.90630100  | 0.34288800  |
| H | 4.05061100  | 3.20533900  | -0.70953900 |
| H | 5.03459100  | 2.44145000  | 0.54549600  |
| C | 1.62982200  | 0.27291500  | 2.84106700  |
| H | 0.93292500  | 1.09073600  | 3.03395400  |
| H | 1.11603300  | -0.46211900 | 2.21979400  |
| H | 1.85317600  | -0.20332500 | 3.80416700  |
| N | 2.99954400  | 1.81859200  | 0.47881800  |
| C | 3.12414800  | 0.84075000  | -0.66605700 |
| C | 2.00726700  | 0.10520700  | -1.06998900 |
| C | 4.34588500  | 0.64042000  | -1.31696600 |
| C | 2.10853500  | -0.79328300 | -2.13088300 |
| H | 1.04745200  | 0.20628600  | -0.58410900 |
| C | 4.42944300  | -0.26743200 | -2.37232600 |
| H | 5.24660000  | 1.16126500  | -1.02246400 |
| C | 3.31643400  | -0.99476200 | -2.80799200 |
| H | 1.21403800  | -1.33048700 | -2.43328300 |
| H | 5.38821500  | -0.40616700 | -2.86410400 |
| C | 2.48857700  | 4.75132300  | 1.09920200  |
| H | 2.35478400  | 5.15975700  | 0.08894300  |
| H | 2.37134400  | 5.58496000  | 1.79826100  |
| C | 3.40429500  | -1.94968000 | -3.97249800 |

|   |            |             |             |
|---|------------|-------------|-------------|
| H | 2.90706800 | -2.89784400 | -3.74575800 |
| H | 2.91077000 | -1.53212300 | -4.85792100 |
| H | 4.44261900 | -2.16333000 | -4.23979100 |
| C | 1.61330400 | 2.48154500  | 0.41906200  |
| H | 0.86451100 | 1.72149900  | 0.63090400  |
| H | 1.48576000 | 2.80072300  | -0.61946100 |
| C | 1.44162800 | 3.66885700  | 1.35961800  |
| H | 1.48423000 | 3.34678300  | 2.40750900  |
| H | 0.42505800 | 4.03536400  | 1.18803000  |

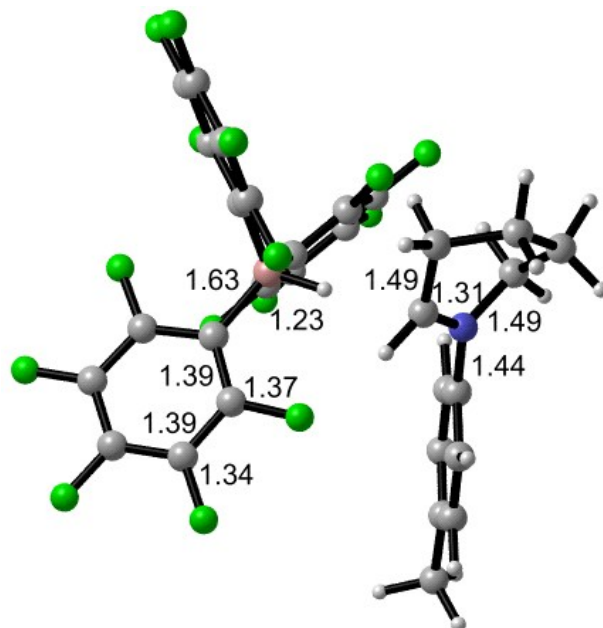

**B**

$G_{\text{gas}} = -2730.127933 \text{ a.u.}$

$E_{\text{gas}} = -2730.46693512 \text{ a.u.}$

|   |             |             |             |
|---|-------------|-------------|-------------|
| C | 3.20102200  | -0.81579900 | -1.47972400 |
| C | 3.74792700  | 0.09311900  | -2.38599400 |
| C | 4.78811600  | 0.92394200  | -1.97652200 |
| C | 5.29728600  | 0.86314400  | -0.67247600 |
| C | 4.73395700  | -0.06524300 | 0.21547700  |
| C | 3.69264200  | -0.90258700 | -0.17499800 |
| H | 3.37691200  | 0.13992500  | -3.40500000 |
| H | 5.21332400  | 1.62766500  | -2.68619700 |
| H | 5.10576500  | -0.12618100 | 1.23425500  |
| H | 3.24522100  | -1.58844600 | 0.53691600  |
| N | 2.11468700  | -1.67142600 | -1.88783500 |
| C | 1.02681500  | -1.19891300 | -2.43618500 |
| H | 0.97899200  | -0.13436800 | -2.62846100 |
| C | -0.01273200 | -2.15572200 | -2.91013600 |
| H | -0.74633900 | -1.62535700 | -3.51655100 |
| H | -0.54479600 | -2.51978000 | -2.02301500 |
| C | 0.63131300  | -3.34802700 | -3.66182600 |
| H | 0.91243900  | -3.02078400 | -4.66703500 |

|   |             |             |             |
|---|-------------|-------------|-------------|
| H | -0.12869300 | -4.12306100 | -3.78752600 |
| C | 1.87617500  | -3.90620100 | -2.92505800 |
| H | 2.75324100  | -3.85946500 | -3.57765900 |
| H | 1.73855600  | -4.95726500 | -2.65502200 |
| C | 2.18267900  | -3.13356200 | -1.63009800 |
| H | 1.45401400  | -3.36720200 | -0.84967300 |
| H | 3.18220000  | -3.35726600 | -1.25960200 |
| B | -0.65409000 | 0.13983700  | 0.09372100  |
| C | -0.54348300 | 1.76863900  | 0.03013800  |
| C | -1.33895400 | 2.59126800  | 0.83275000  |
| C | 0.27915000  | 2.45451700  | -0.85915600 |
| C | -1.32854300 | 3.98125100  | 0.76824100  |
| C | 0.32692600  | 3.84369300  | -0.96528300 |
| C | -0.48634000 | 4.61451700  | -0.14310400 |
| C | 0.04035100  | -0.58345500 | 1.38798000  |
| C | 0.18113200  | -1.97225200 | 1.39316200  |
| C | 0.59697700  | 0.04084900  | 2.50810700  |
| C | 0.82744400  | -2.70612600 | 2.38152000  |
| C | 1.24885600  | -0.64843100 | 3.53340700  |
| C | 1.36777700  | -2.03277900 | 3.47358200  |
| C | -2.20105300 | -0.31951400 | -0.18058600 |
| C | -2.72705400 | -0.25275700 | -1.47188000 |
| C | -3.10272800 | -0.76380000 | 0.78895500  |
| C | -4.02848500 | -0.61429100 | -1.80767400 |
| C | -4.41719100 | -1.13297300 | 0.50404000  |
| C | -4.88489200 | -1.05775200 | -0.80450300 |
| F | 1.11507000  | 1.78044400  | -1.70185000 |
| F | 1.14743200  | 4.43903800  | -1.84842000 |
| F | -0.45827300 | 5.95189100  | -0.22381200 |
| F | -2.11361600 | 4.71678700  | 1.56932300  |
| F | -2.16383600 | 2.03267700  | 1.74072800  |
| F | 0.54861100  | 1.37871200  | 2.65445400  |
| F | 1.76871600  | 0.01504200  | 4.57674800  |
| F | 1.99653200  | -2.70757400 | 4.44554300  |
| F | 0.93883000  | -4.04313800 | 2.28532300  |
| F | -0.31017500 | -2.70644100 | 0.34978800  |
| F | -1.94267900 | 0.17581000  | -2.49990000 |
| F | -2.72520500 | -0.86031000 | 2.07870800  |
| F | -5.23668600 | -1.55782200 | 1.47745600  |
| F | -6.14390900 | -1.41154900 | -1.09677300 |
| F | -4.46092000 | -0.54082400 | -3.07809300 |
| H | -0.01795700 | -0.29912500 | -0.86353200 |
| C | 6.40049100  | 1.79015400  | -0.22496500 |
| H | 5.98337900  | 2.69152500  | 0.24018900  |
| H | 7.04963300  | 1.31294100  | 0.51472000  |
| H | 7.01924300  | 2.11289400  | -1.06672500 |

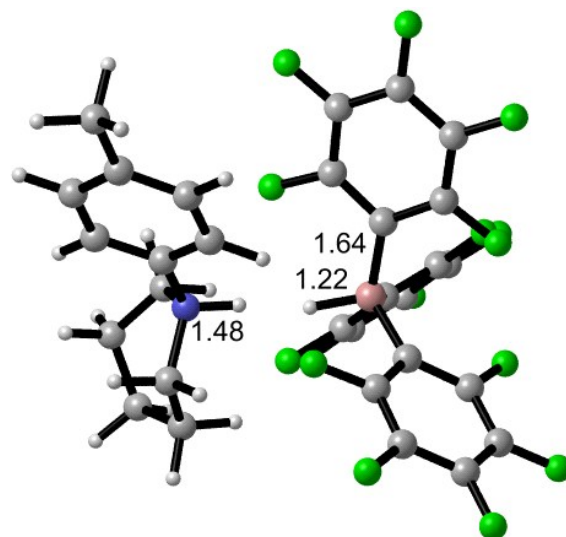

**C**

**G<sub>gas</sub> = -2731.323348 a.u.**

**E<sub>gas</sub> = -2731.68909731 a.u.**

|   |             |             |             |
|---|-------------|-------------|-------------|
| H | 1.50268900  | -1.26791100 | -0.38898400 |
| C | 3.54625900  | -1.19560100 | -0.21465100 |
| C | 4.70909000  | -1.84295200 | 0.19881900  |
| C | 5.88854200  | -1.10978800 | 0.32102600  |
| C | 5.92772400  | 0.26113200  | 0.03331400  |
| C | 4.74492200  | 0.87824900  | -0.39481700 |
| C | 3.55582000  | 0.16238200  | -0.52362000 |
| H | 4.70918200  | -2.90304500 | 0.42997300  |
| H | 6.79289600  | -1.61523300 | 0.64771700  |
| H | 4.74744600  | 1.93875400  | -0.62969200 |
| H | 2.65258000  | 0.65527200  | -0.86499200 |
| N | 2.28724100  | -1.95553300 | -0.38556000 |
| C | 2.24427400  | -2.64725400 | -1.74636000 |
| H | 3.19820500  | -3.16630800 | -1.86197700 |
| H | 2.18680700  | -1.84614900 | -2.48257500 |
| C | 1.05429300  | -3.59599100 | -1.82791200 |
| H | 1.01161800  | -3.99099400 | -2.84758100 |
| H | 0.13554700  | -3.02257500 | -1.67695900 |
| C | 1.14865800  | -4.74090800 | -0.78752600 |
| H | 1.50172000  | -5.66378000 | -1.25810900 |
| H | 0.14906100  | -4.94338800 | -0.39356600 |
| C | 2.09289700  | -4.37107100 | 0.37497100  |
| H | 3.13480500  | -4.58922200 | 0.11191300  |
| H | 1.87097800  | -4.97814600 | 1.25848400  |
| C | 1.94097400  | -2.90709600 | 0.77227100  |
| H | 0.90276600  | -2.68948800 | 1.02260200  |
| H | 2.56989900  | -2.61968500 | 1.61306400  |
| B | -0.81015300 | 0.12151600  | 0.01075000  |
| C | -1.27092700 | 0.51566200  | -1.51373700 |
| C | -2.55449900 | 0.90944600  | -1.90382200 |

|   |             |             |             |
|---|-------------|-------------|-------------|
| C | -0.35655900 | 0.45952500  | -2.56365400 |
| C | -2.90626800 | 1.19957900  | -3.22183400 |
| C | -0.65145800 | 0.73843100  | -3.89444700 |
| C | -1.94827900 | 1.11328400  | -4.22781900 |
| C | -0.08438500 | 1.35619400  | 0.80969900  |
| C | 0.97724300  | 1.11539200  | 1.68240000  |
| C | -0.44383700 | 2.70264500  | 0.70053800  |
| C | 1.65667600  | 2.10532100  | 2.38760300  |
| C | 0.20258300  | 3.73083100  | 1.38552000  |
| C | 1.26204400  | 3.43040100  | 2.23683300  |
| C | -1.98374700 | -0.59775600 | 0.90189800  |
| C | -2.11761600 | -1.98454700 | 0.95274400  |
| C | -2.91182500 | 0.09220600  | 1.68820600  |
| C | -3.06708800 | -2.65943200 | 1.71576600  |
| C | -3.88269100 | -0.53340300 | 2.46815400  |
| C | -3.96281100 | -1.92302800 | 2.48244100  |
| F | 0.94734400  | 0.10632700  | -2.31933700 |
| F | 0.29370300  | 0.64821600  | -4.84590900 |
| F | -2.26902000 | 1.38942500  | -5.49856800 |
| F | -4.15806800 | 1.56624200  | -3.53071600 |
| F | -3.53735700 | 1.03203100  | -0.99368300 |
| F | -1.46393200 | 3.07205100  | -0.09549000 |
| F | -0.18559300 | 5.00567700  | 1.23565500  |
| F | 1.89696900  | 4.40573900  | 2.90127700  |
| F | 2.68087400  | 1.79626600  | 3.20110600  |
| F | 1.42361200  | -0.15886600 | 1.88032400  |
| F | -1.27177300 | -2.78706700 | 0.23848700  |
| F | -2.90541100 | 1.43764600  | 1.71973200  |
| F | -4.74285800 | 0.18754000  | 3.20193300  |
| F | -4.88874200 | -2.54288400 | 3.22598700  |
| F | -3.12151300 | -4.00276600 | 1.71804600  |
| H | 0.04930300  | -0.73504600 | -0.13410500 |
| C | 7.19865000  | 1.05665500  | 0.20477600  |
| H | 8.08415100  | 0.41953800  | 0.13006500  |
| H | 7.28046100  | 1.84559800  | -0.54838300 |
| H | 7.22389300  | 1.54172700  | 1.18801800  |

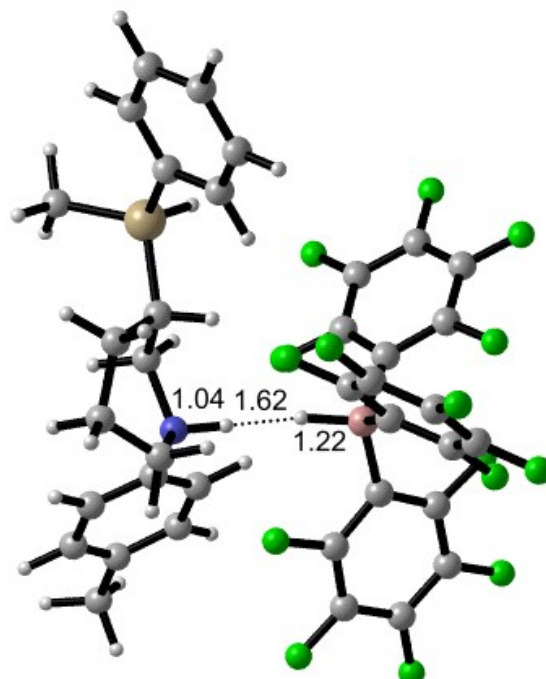

**C1**

**$G_{\text{gas}} = -3292.293283$  a.u.**

**$E_{\text{gas}} = -3292.77235166$  a.u.**

|   |             |            |             |
|---|-------------|------------|-------------|
| H | 0.32766500  | 1.65951600 | -0.40453300 |
| C | 1.16342500  | 3.51744300 | -0.60696500 |
| C | 2.12569100  | 3.21835700 | 0.35485000  |
| C | 3.17169900  | 4.11418300 | 0.57029100  |
| C | 3.27366500  | 5.30782300 | -0.15607300 |
| C | 2.28236500  | 5.58678200 | -1.10651900 |
| C | 1.22861800  | 4.70356800 | -1.33635400 |
| H | 2.05864800  | 2.30388200 | 0.93319300  |
| H | 3.92335400  | 3.87424200 | 1.31683800  |
| H | 2.33310700  | 6.50842000 | -1.67936600 |
| H | 0.47759900  | 4.94602200 | -2.08057700 |
| N | 0.04109800  | 2.57524800 | -0.80672300 |
| C | -1.20525800 | 3.00272900 | -0.01154100 |
| H | -1.34486800 | 4.06721900 | -0.21342800 |
| H | -0.92798900 | 2.87627600 | 1.03509400  |
| C | -2.40602200 | 2.15995000 | -0.41959600 |
| H | -2.09449800 | 1.11316900 | -0.32253800 |
| C | -2.78800100 | 2.42132500 | -1.90441500 |
| H | -3.59434000 | 3.15913700 | -1.98793400 |
| H | -3.17258100 | 1.49219100 | -2.33311300 |
| C | -1.57894600 | 2.91538300 | -2.72795100 |
| H | -1.48964200 | 4.00618400 | -2.66521800 |
| H | -1.71490100 | 2.68552000 | -3.78986700 |
| C | -0.28465100 | 2.25261900 | -2.27288600 |
| H | -0.37647600 | 1.16684900 | -2.31636300 |
| H | 0.58357500  | 2.54886700 | -2.85915400 |



|    |             |             |             |
|----|-------------|-------------|-------------|
| B  | 0.87434800  | -1.02686100 | 0.01789200  |
| C  | 0.35763500  | -1.22977400 | 1.56342200  |
| C  | 0.11083100  | -2.45861600 | 2.18345200  |
| C  | 0.10511300  | -0.12883800 | 2.37884200  |
| C  | -0.36628900 | -2.58410300 | 3.48773000  |
| C  | -0.37105700 | -0.19435600 | 3.68459100  |
| C  | -0.61154100 | -1.44321500 | 4.24645800  |
| C  | 2.50171800  | -0.86206600 | -0.10291000 |
| C  | 3.06604100  | 0.03599900  | -1.00951000 |
| C  | 3.43613900  | -1.56513700 | 0.66356100  |
| C  | 4.43403900  | 0.25147100  | -1.15677600 |
| C  | 4.81460500  | -1.38752900 | 0.55398000  |
| C  | 5.31909500  | -0.47134000 | -0.36446300 |
| C  | 0.25385200  | -2.13903100 | -1.01810200 |
| C  | -0.96073800 | -1.92617900 | -1.66767100 |
| C  | 0.85220600  | -3.36459000 | -1.32791700 |
| C  | -1.56208000 | -2.82491700 | -2.54393500 |
| C  | 0.30000700  | -4.29610900 | -2.20598000 |
| C  | -0.92064500 | -4.02707500 | -2.81870100 |
| F  | 0.32772500  | 1.14089300  | 1.90612200  |
| F  | -0.59658200 | 0.92353700  | 4.39517600  |
| F  | -1.06879100 | -1.54596700 | 5.50106800  |
| F  | -0.58728500 | -3.79358800 | 4.02203200  |
| F  | 0.33456500  | -3.61115300 | 1.52637100  |
| F  | 3.02784100  | -2.47433400 | 1.56759400  |
| F  | 5.66057700  | -2.09021000 | 1.32163300  |
| F  | 6.64103500  | -0.28529900 | -0.48242900 |
| F  | 4.90159000  | 1.14427200  | -2.04614600 |
| F  | 2.26493500  | 0.78594500  | -1.82011500 |
| F  | -1.65451900 | -0.76186700 | -1.47177200 |
| F  | 2.02252100  | -3.71116400 | -0.76195800 |
| F  | 0.92734200  | -5.45345700 | -2.46065700 |
| F  | -1.46980000 | -4.91328600 | -3.65984900 |
| F  | -2.74469000 | -2.53985400 | -3.11831700 |
| H  | 0.40229200  | 0.04128700  | -0.33872700 |
| Si | -3.87941200 | 2.31602200  | 0.79657500  |
| H  | -3.35234600 | 1.93213300  | 2.13796000  |
| C  | -4.50065400 | 4.09927900  | 0.88903600  |
| H  | -5.31607300 | 4.19224200  | 1.61376200  |
| H  | -3.70444800 | 4.77657700  | 1.21712700  |
| H  | -4.87480900 | 4.45676600  | -0.07592800 |
| C  | -5.23566700 | 1.13693900  | 0.23211100  |
| C  | -4.92930000 | -0.09779200 | -0.37370400 |
| C  | -6.59404700 | 1.45698000  | 0.41396800  |
| C  | -5.93735200 | -0.97267000 | -0.78112300 |
| H  | -3.89689200 | -0.38990500 | -0.54453600 |
| C  | -7.60522600 | 0.58207500  | 0.01275200  |

|   |             |             |             |
|---|-------------|-------------|-------------|
| H | -6.87404400 | 2.40183300  | 0.87329000  |
| C | -7.27795600 | -0.63493100 | -0.58707800 |
| H | -5.67169300 | -1.91421600 | -1.25336900 |
| H | -8.64652100 | 0.85202300  | 0.16542000  |
| H | -8.06328200 | -1.31553100 | -0.90367100 |
| C | 4.43200100  | 6.25070200  | 0.06051000  |
| H | 4.17616900  | 7.27379400  | -0.22850700 |
| H | 4.74868600  | 6.26022600  | 1.10740100  |
| H | 5.29858600  | 5.94631400  | -0.53876800 |

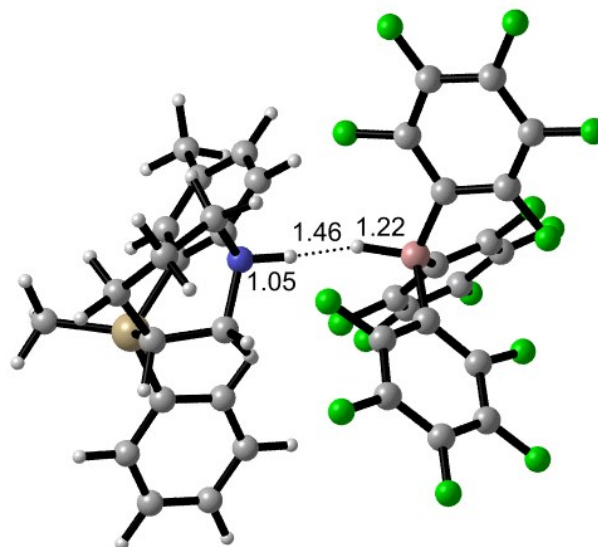

**C2**

**$G_{\text{gas}} = -3291.115256$  a.u.**

**$E_{\text{gas}} = -3291.5804317$  a.u.**

|   |             |             |             |
|---|-------------|-------------|-------------|
| B | -1.75117100 | -0.03605100 | 0.08751900  |
| C | -3.03178100 | 0.77026500  | -0.53597900 |
| C | -4.36475000 | 0.44626100  | -0.26519100 |
| C | -2.87247000 | 1.81454300  | -1.44605900 |
| C | -5.45249600 | 1.10367000  | -0.83528800 |
| C | -3.92488300 | 2.50394100  | -2.04452600 |
| C | -5.23102200 | 2.14396300  | -1.73373800 |
| C | -1.29787600 | 0.39359900  | 1.60471200  |
| C | 0.02771500  | 0.21133000  | 1.99818900  |
| C | -2.10938700 | 0.94905600  | 2.59745800  |
| C | 0.54216200  | 0.54670900  | 3.24529200  |
| C | -1.64434500 | 1.30548000  | 3.86440700  |
| C | -0.30780800 | 1.10283600  | 4.19495600  |
| C | -1.90545200 | -1.65778700 | -0.09388900 |
| C | -1.51142100 | -2.29075500 | -1.27212200 |
| C | -2.42606200 | -2.52184800 | 0.87385300  |
| C | -1.59406100 | -3.66149300 | -1.49720900 |
| C | -2.53752900 | -3.90064400 | 0.69567300  |
| C | -2.11911400 | -4.47682800 | -0.50021900 |



|    |             |             |             |
|----|-------------|-------------|-------------|
| C  | 2.00177000  | -4.13580100 | -0.23001800 |
| C  | 1.84875800  | 1.23300800  | 0.04244700  |
| C  | 1.27728000  | 2.40373900  | 0.56853800  |
| C  | 3.23742900  | 1.11113100  | 0.21512600  |
| C  | 2.01709300  | 3.37958600  | 1.22659100  |
| C  | 4.01179100  | 2.07606800  | 0.84920200  |
| C  | 3.39441900  | 3.21527500  | 1.36181400  |
| F  | -1.50511300 | -1.37079200 | -0.82115200 |
| F  | -3.65336900 | -0.66065900 | -2.23745500 |
| F  | -3.60302800 | 1.59043400  | -3.78629600 |
| F  | -1.36241100 | 3.14306300  | -3.86474000 |
| F  | 0.79188300  | 2.47981900  | -2.41481400 |
| F  | 0.95645700  | -1.85077900 | -2.81796800 |
| F  | 1.56924800  | -4.44946300 | -2.53242800 |
| F  | 2.28587700  | -5.42949500 | -0.08986300 |
| F  | 2.39613000  | -3.76316100 | 2.07320500  |
| F  | 1.85405300  | -1.15952600 | 1.79865000  |
| F  | -0.04536000 | 2.61029900  | 0.48068500  |
| F  | 3.88867000  | 0.04041900  | -0.26733100 |
| F  | 5.33384900  | 1.92216700  | 0.97191100  |
| F  | 4.11922000  | 4.14530700  | 1.98000500  |
| F  | 1.42481900  | 4.46814800  | 1.72640700  |
| H  | -0.88458900 | 0.13071800  | 1.72947300  |
| Si | -1.68700700 | -0.55539500 | 2.78212300  |
| H  | -1.31469300 | 0.05083000  | 4.09130800  |
| C  | -3.51855700 | -0.22588500 | 2.49335700  |
| C  | -4.30404900 | 0.37961300  | 3.49064400  |
| C  | -4.14902500 | -0.57295100 | 1.28265600  |
| C  | -5.66400100 | 0.62779800  | 3.29099000  |
| H  | -3.84860400 | 0.66460500  | 4.43607800  |
| C  | -5.50598900 | -0.32373100 | 1.07708100  |
| H  | -3.57922900 | -1.04021200 | 0.48444400  |
| C  | -6.26715800 | 0.27692000  | 2.08269200  |
| H  | -6.25020100 | 1.09654400  | 4.07673700  |
| H  | -5.96658400 | -0.59511100 | 0.13108000  |
| H  | -7.32421900 | 0.47169900  | 1.92378900  |
| C  | -1.26494200 | -2.39672400 | 2.78068400  |
| H  | -0.19546300 | -2.54907300 | 2.95781700  |
| H  | -1.81777500 | -2.92545700 | 3.56343500  |
| H  | -1.52030600 | -2.85644600 | 1.82042400  |

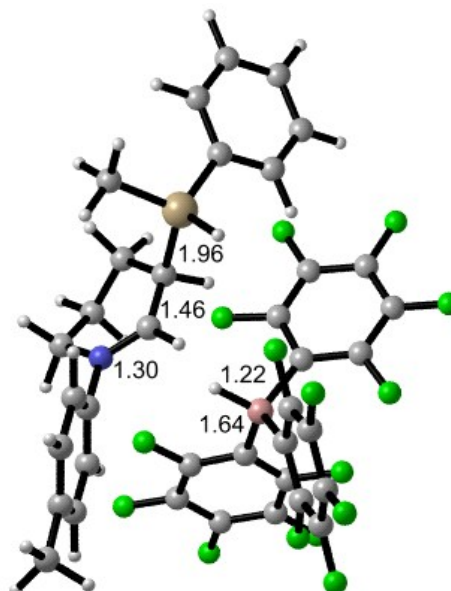

**E**

**G<sub>gas</sub> = -3291.108117 a.u.**

**E<sub>gas</sub> = -3291.56225959 a.u.**

|    |             |            |             |
|----|-------------|------------|-------------|
| C  | -1.39136400 | 3.47374200 | -1.20797600 |
| C  | -2.62434900 | 2.89277300 | -1.51628900 |
| C  | -3.78997100 | 3.53947400 | -1.11647900 |
| C  | -3.75264100 | 4.75453700 | -0.41357100 |
| C  | -2.50219200 | 5.31181100 | -0.12037400 |
| C  | -1.32184000 | 4.68060800 | -0.51333300 |
| H  | -2.66504400 | 1.93458400 | -2.02235400 |
| H  | -4.74915600 | 3.08225600 | -1.34289300 |
| H  | -2.44652800 | 6.25272000 | 0.41940500  |
| H  | -0.35728600 | 5.12846700 | -0.29306800 |
| N  | -0.16383000 | 2.81617600 | -1.60686300 |
| C  | 2.32540500  | 1.62605800 | -2.46458000 |
| H  | 2.96130400  | 0.74751400 | -2.58974300 |
| H  | 2.90254300  | 2.49326900 | -2.80943300 |
| C  | 1.05879600  | 1.49218400 | -3.31726800 |
| H  | 0.54622000  | 0.55766000 | -3.07961300 |
| H  | 1.30644000  | 1.47782100 | -4.38333000 |
| C  | 0.10401500  | 2.65351200 | -3.06264700 |
| H  | 0.49692400  | 3.60794100 | -3.43298300 |
| H  | -0.86407500 | 2.48413300 | -3.53698100 |
| C  | 0.64488700  | 2.33245000 | -0.70512300 |
| H  | 0.29715900  | 2.37633100 | 0.32232200  |
| C  | 1.96583600  | 1.77109900 | -0.97074700 |
| H  | 1.95341600  | 0.79605400 | -0.46367400 |
| Si | 3.32766600  | 2.68623200 | 0.09274500  |
| H  | 2.74848700  | 2.80229500 | 1.45615100  |
| C  | 4.83453000  | 1.57387000 | 0.07351000  |
| C  | 4.74231900  | 0.26087200 | 0.57428100  |

|   |             |             |             |
|---|-------------|-------------|-------------|
| C | 6.06685200  | 1.99476300  | -0.45730800 |
| C | 5.83262600  | -0.60750000 | 0.53110200  |
| H | 3.80826900  | -0.09777400 | 1.00033700  |
| C | 7.16560100  | 1.13362600  | -0.48953200 |
| H | 6.17731900  | 3.00208800  | -0.85106800 |
| C | 7.04727200  | -0.16844100 | -0.00113400 |
| H | 5.72777200  | -1.62390200 | 0.89758500  |
| H | 8.11033100  | 1.47726900  | -0.90127000 |
| H | 7.89875200  | -0.84186200 | -0.03682500 |
| C | 3.67374500  | 4.40671200  | -0.59783100 |
| H | 4.06513600  | 4.37771900  | -1.61946400 |
| H | 2.76787600  | 5.02243000  | -0.60146300 |
| H | 4.41269200  | 4.92052000  | 0.02597200  |
| B | -0.76429000 | -0.94486800 | 0.11956900  |
| C | 0.60561700  | -1.80127300 | 0.43701500  |
| C | 0.89595500  | -2.47194000 | 1.62867700  |
| C | 1.60511900  | -1.90210200 | -0.53293900 |
| C | 2.09639000  | -3.14423600 | 1.86405400  |
| C | 2.81758300  | -2.56145600 | -0.34954500 |
| C | 3.06635200  | -3.18580500 | 0.86769000  |
| C | -1.70577400 | -1.79739300 | -0.91239800 |
| C | -2.09795100 | -1.31535000 | -2.15765200 |
| C | -2.11853400 | -3.10613800 | -0.64755500 |
| C | -2.84747200 | -2.04292800 | -3.08035800 |
| C | -2.86625200 | -3.87765600 | -1.53228700 |
| C | -3.23439100 | -3.33961700 | -2.76370500 |
| C | -1.50048100 | -0.38882400 | 1.47718600  |
| C | -0.82172100 | 0.52389600  | 2.28675100  |
| C | -2.78938600 | -0.68499200 | 1.92665400  |
| C | -1.33981100 | 1.11442900  | 3.43317400  |
| C | -3.35849700 | -0.12282800 | 3.07143500  |
| C | -2.62985200 | 0.78155900  | 3.83479300  |
| F | 1.43885300  | -1.30426300 | -1.74548100 |
| F | 3.75214200  | -2.57703200 | -1.31593500 |
| F | 4.24579400  | -3.79384400 | 1.08605800  |
| F | 2.32674000  | -3.74802000 | 3.03943200  |
| F | 0.00980500  | -2.48397800 | 2.64221600  |
| F | -1.79748200 | -3.67611300 | 0.53071800  |
| F | -3.23710300 | -5.12804500 | -1.21767100 |
| F | -3.95483000 | -4.06350300 | -3.63211000 |
| F | -3.19221700 | -1.50693900 | -4.26524600 |
| F | -1.75343200 | -0.05244500 | -2.55942100 |
| F | 0.44777000  | 0.91153300  | 1.94860900  |
| F | -3.58211200 | -1.54334900 | 1.25237200  |
| F | -4.60754200 | -0.44686500 | 3.44128900  |
| F | -3.16354700 | 1.33400200  | 4.93417700  |
| F | -0.61809000 | 1.99699700  | 4.14588700  |

|   |             |            |             |
|---|-------------|------------|-------------|
| H | -0.40498100 | 0.05215700 | -0.47767500 |
| C | -5.03002200 | 5.42308100 | 0.03248800  |
| H | -5.77565100 | 5.43218700 | -0.76870600 |
| H | -5.47347000 | 4.88823000 | 0.88063200  |
| H | -4.85466200 | 6.45510000 | 0.34680800  |

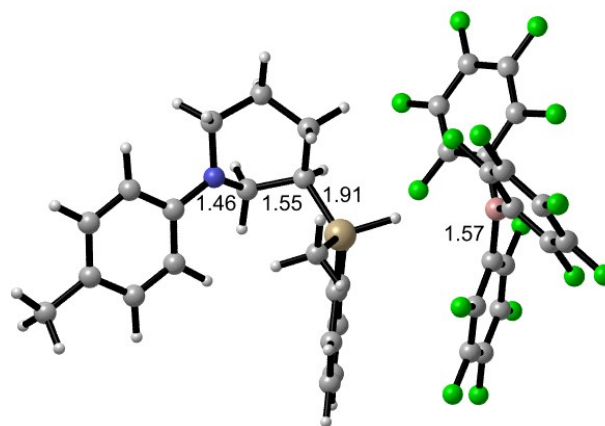

**F**

**G<sub>gas</sub> = -3291.119664 a.u.**

**E<sub>gas</sub> = -3291.57244913 a.u.**

|    |            |             |             |
|----|------------|-------------|-------------|
| C  | 5.81062200 | -1.11144700 | -0.00006600 |
| C  | 5.94571800 | 0.27434800  | 0.25103700  |
| C  | 7.09842000 | 0.79133900  | 0.83060400  |
| C  | 8.17729300 | -0.02441300 | 1.20098300  |
| C  | 8.03956400 | -1.39309200 | 0.96139200  |
| C  | 6.89485500 | -1.93249200 | 0.37278200  |
| H  | 5.14140600 | 0.96012800  | 0.00940500  |
| H  | 7.15448800 | 1.86372200  | 1.00639100  |
| H  | 8.85017400 | -2.06632600 | 1.23215700  |
| H  | 6.85853200 | -3.00116100 | 0.20200100  |
| N  | 4.64059100 | -1.65473400 | -0.54084700 |
| C  | 2.07162000 | -2.62707800 | -0.63579400 |
| H  | 1.07483900 | -2.97225100 | -0.93014600 |
| H  | 2.12403600 | -2.74097900 | 0.45442900  |
| C  | 3.16192100 | -3.50776300 | -1.25724800 |
| H  | 3.12896800 | -3.41918900 | -2.34987700 |
| H  | 2.99382100 | -4.56568600 | -1.02831700 |
| C  | 4.55000700 | -3.10306300 | -0.72711200 |
| H  | 4.71956900 | -3.58469800 | 0.24445300  |
| H  | 5.33374900 | -3.47658500 | -1.40974500 |
| C  | 2.26990100 | -1.14032800 | -1.05278400 |
| H  | 1.68278400 | -0.96217400 | -1.96490800 |
| Si | 1.58482300 | 0.05997500  | 0.26199000  |
| C  | 1.76411100 | 1.84953800  | -0.32930300 |
| C  | 1.53981300 | 2.20374400  | -1.67494800 |
| C  | 2.10570200 | 2.88319600  | 0.56350800  |
| C  | 1.64516800 | 3.52675600  | -2.10674700 |

|   |             |             |             |
|---|-------------|-------------|-------------|
| H | 1.27024100  | 1.44002400  | -2.39915600 |
| C | 2.20860800  | 4.20989600  | 0.13869100  |
| H | 2.29181400  | 2.65498100  | 1.60949900  |
| C | 1.97797600  | 4.53483700  | -1.19872800 |
| H | 1.46853700  | 3.77136100  | -3.15074800 |
| H | 2.46803200  | 4.98771000  | 0.85137600  |
| H | 2.05870100  | 5.56558600  | -1.53238100 |
| C | 2.38401900  | -0.16189000 | 1.95732000  |
| H | 3.45774000  | 0.04783600  | 1.93245700  |
| H | 1.92202200  | 0.49811600  | 2.69913200  |
| H | 2.25595100  | -1.18899000 | 2.31334100  |
| C | 3.75819700  | -0.88948500 | -1.41739800 |
| H | 4.00536300  | 0.16952500  | -1.36182100 |
| H | 3.93656400  | -1.17733300 | -2.46759700 |
| B | -2.58233700 | -0.02696400 | 0.05002500  |
| C | -2.39644300 | 1.50516600  | -0.21966700 |
| C | -2.87141600 | 2.13028500  | -1.38459400 |
| C | -1.73067000 | 2.35194900  | 0.68283700  |
| C | -2.70596700 | 3.48612100  | -1.64193700 |
| C | -1.53134100 | 3.70734200  | 0.45173200  |
| C | -2.02498700 | 4.27747200  | -0.71917800 |
| C | -2.78763800 | -0.55874700 | 1.51436700  |
| C | -2.21851400 | -1.76124600 | 1.95951200  |
| C | -3.56119700 | 0.12864800  | 2.46089300  |
| C | -2.38534600 | -2.24733000 | 3.25138900  |
| C | -3.76868000 | -0.33698600 | 3.75463100  |
| C | -3.17216300 | -1.53189600 | 4.15187200  |
| C | -2.59685300 | -1.05487600 | -1.14202800 |
| C | -1.73557900 | -0.94946900 | -2.24300000 |
| C | -3.46154000 | -2.15931100 | -1.16464800 |
| C | -1.69943500 | -1.87725200 | -3.27680100 |
| C | -3.47731300 | -3.09312600 | -2.19599100 |
| C | -2.58498800 | -2.95311300 | -3.25648500 |
| F | -1.20881000 | 1.85841200  | 1.81845200  |
| F | -0.87194600 | 4.46267300  | 1.33448000  |
| F | -1.84948900 | 5.57602500  | -0.95555300 |
| F | -3.19012500 | 4.03507100  | -2.76130200 |
| F | -3.54515900 | 1.42293900  | -2.30713300 |
| F | -4.16641900 | 1.28125400  | 2.12898400  |
| F | -4.52935300 | 0.34663800  | 4.61571400  |
| F | -3.35229800 | -1.98877900 | 5.39035000  |
| F | -1.80454600 | -3.38913900 | 3.63480200  |
| F | -1.44121600 | -2.48791200 | 1.13750400  |
| F | -0.85423900 | 0.06607500  | -2.32008000 |
| F | -4.34710700 | -2.34525000 | -0.17187800 |
| F | -4.33352400 | -4.11935900 | -2.17690900 |
| F | -2.57611100 | -3.84489800 | -4.24608100 |

|   |             |             |             |
|---|-------------|-------------|-------------|
| F | -0.83042200 | -1.74394200 | -4.28493200 |
| H | 0.13129900  | -0.25768700 | 0.40120100  |
| C | 9.42849700  | 0.55748200  | 1.81525300  |
| H | 10.01518800 | 1.12538600  | 1.08183200  |
| H | 9.19401500  | 1.24425500  | 2.63672200  |
| H | 10.07740900 | -0.22782600 | 2.21438400  |

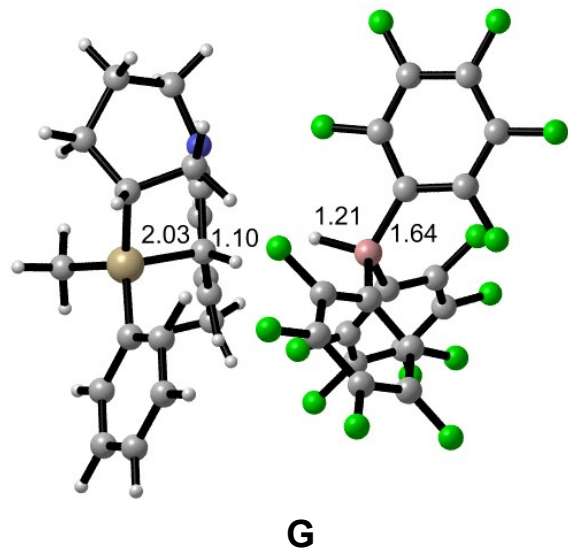

$$G_{\text{gas}} = -3291.084405 \text{ a.u.}$$

$$E_{\text{gas}} = -3291.54843718 \text{ a.u.}$$

|    |             |             |             |
|----|-------------|-------------|-------------|
| C  | -2.39781000 | -2.40408000 | -0.14390600 |
| C  | -2.50130500 | -1.02433700 | 0.37190000  |
| C  | -2.85260200 | -0.85648100 | 1.78018800  |
| C  | -3.23584000 | -1.89447000 | 2.58009600  |
| C  | -3.20460800 | -3.20523600 | 2.00208900  |
| C  | -2.80492600 | -3.46746200 | 0.71397600  |
| H  | -1.63760400 | -0.39407200 | 0.11858100  |
| H  | -2.76320100 | 0.14597400  | 2.18572900  |
| H  | -3.47482600 | -4.04931900 | 2.63311900  |
| H  | -2.73604400 | -4.49576800 | 0.38178500  |
| N  | -2.00077500 | -2.59149600 | -1.41101500 |
| C  | -4.07378400 | -2.05346400 | -3.10086600 |
| H  | -4.60081300 | -1.72330100 | -4.00100300 |
| H  | -4.85604000 | -2.35812600 | -2.39688300 |
| C  | -3.22017200 | -3.29375200 | -3.43873300 |
| H  | -2.56424300 | -3.07641500 | -4.28698200 |
| H  | -3.86536600 | -4.11920400 | -3.75553600 |
| C  | -2.37400000 | -3.76575100 | -2.22384300 |
| H  | -2.95361200 | -4.45487600 | -1.61015100 |
| H  | -1.46333300 | -4.27942100 | -2.54834900 |
| C  | -3.21685300 | -0.86941600 | -2.52215300 |
| H  | -3.15931600 | -0.04925200 | -3.24583100 |
| Si | -3.86045400 | -0.15297500 | -0.85813300 |
| C  | -3.72738400 | 1.70932300  | -0.75933400 |

|   |             |             |             |   |             |             |             |
|---|-------------|-------------|-------------|---|-------------|-------------|-------------|
| C | -2.72864200 | 2.40692100  | -1.46809300 | F | 3.34846400  | -1.32447600 | 2.07784600  |
| C | -4.64731000 | 2.46123800  | -0.00206300 | F | 2.87285900  | -1.55432400 | 4.68740700  |
| C | -2.65412100 | 3.79905800  | -1.42467100 | F | 0.62170500  | -0.47032200 | 5.80555600  |
| H | -1.98693200 | 1.87379400  | -2.05420500 | F | -1.15905800 | 0.88589200  | 4.20716300  |
| C | -4.57236400 | 3.85336600  | 0.04550700  | H | 0.36140900  | -0.30684500 | -0.34135400 |
| H | -5.43638600 | 1.96287400  | 0.55468300  | C | -3.60430200 | -1.70872200 | 4.03173100  |
| C | -3.57637700 | 4.52339800  | -0.66727600 | H | -4.69039700 | -1.74932000 | 4.17930400  |
| H | -1.87432400 | 4.30652100  | -1.98299500 | H | -3.16321200 | -2.49381300 | 4.65434700  |
| H | -5.29154600 | 4.41352500  | 0.63612800  | H | -3.24315000 | -0.74683700 | 4.40226400  |
| H | -3.51817500 | 5.60744700  | -0.63148000 |   |             |             |             |
| C | -5.56888800 | -0.76005700 | -0.34643400 |   |             |             |             |
| H | -5.60551000 | -1.84930600 | -0.25297000 |   |             |             |             |
| H | -5.85748800 | -0.34128000 | 0.62208300  |   |             |             |             |
| H | -6.32420200 | -0.45671300 | -1.07914100 |   |             |             |             |
| C | -1.78798500 | -1.40197400 | -2.24750400 |   |             |             |             |
| H | -1.12079000 | -0.69475300 | -1.75799900 |   |             |             |             |
| H | -1.27148400 | -1.71813600 | -3.15435800 |   |             |             |             |
| B | 1.45406900  | 0.05002900  | 0.05081300  |   |             |             |             |
| C | 1.61827700  | 1.60939500  | -0.43452300 |   |             |             |             |
| C | 2.34881800  | 2.58708300  | 0.24675900  |   |             |             |             |
| C | 0.96611200  | 2.07473800  | -1.57506700 |   |             |             |             |
| C | 2.41749000  | 3.92126900  | -0.15470700 |   |             |             |             |
| C | 0.99051100  | 3.39711000  | -2.00646200 |   |             |             |             |
| C | 1.72505100  | 4.33370400  | -1.28872000 |   |             |             |             |
| C | 2.54634400  | -0.92985900 | -0.67709100 |   |             |             |             |
| C | 2.16681300  | -2.09775600 | -1.33855000 |   |             |             |             |
| C | 3.91499700  | -0.65405500 | -0.74283900 |   |             |             |             |
| C | 3.05042700  | -2.93095600 | -2.02257200 |   |             |             |             |
| C | 4.83796200  | -1.45406300 | -1.41204900 |   |             |             |             |
| C | 4.40077200  | -2.60590500 | -2.06050400 |   |             |             |             |
| C | 1.35608500  | -0.07074800 | 1.68500500  |   |             |             |             |
| C | 0.24998800  | 0.49125700  | 2.32514600  |   |             |             |             |
| C | 2.22577100  | -0.74385600 | 2.54520100  |   |             |             |             |
| C | -0.02650200 | 0.36563100  | 3.68159300  |   |             |             |             |
| C | 2.00217800  | -0.88307300 | 3.91712600  |   |             |             |             |
| C | 0.86353700  | -0.32978200 | 4.49300600  |   |             |             |             |
| F | 0.21589300  | 1.22504800  | -2.33668500 |   |             |             |             |
| F | 0.27581000  | 3.78606600  | -3.08476200 |   |             |             |             |
| F | 1.75816500  | 5.61596400  | -1.68147600 |   |             |             |             |
| F | 3.13211600  | 4.81486600  | 0.54678900  |   |             |             |             |
| F | 3.02436200  | 2.27378300  | 1.36835400  |   |             |             |             |
| F | 4.40888800  | 0.43869300  | -0.12850000 |   |             |             |             |
| F | 6.14093100  | -1.13164100 | -1.43813300 |   |             |             |             |
| F | 5.27106400  | -3.39186600 | -2.71169900 |   |             |             |             |
| F | 2.60771400  | -4.04159100 | -2.64350400 |   |             |             |             |
| F | 0.86641100  | -2.49983300 | -1.35278700 |   |             |             |             |
| F | -0.66911500 | 1.18587100  | 1.59553600  |   |             |             |             |

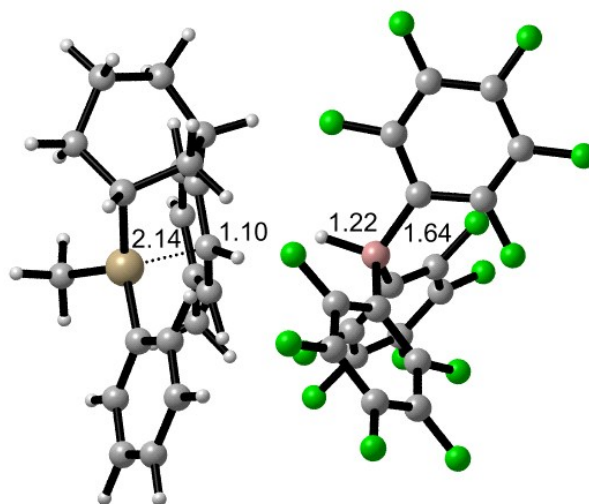

**G1**

**$G_{\text{gas}} = -3275.028497$  a.u.**

**$E_{\text{gas}} = -3275.50383830$  a.u.**

|   |             |             |             |
|---|-------------|-------------|-------------|
| C | -2.67401200 | -2.26749700 | -0.34555000 |
| C | -2.51616600 | -0.96835600 | 0.25425300  |
| C | -2.95753200 | -0.72926000 | 1.59160500  |
| C | -3.64267000 | -1.69514300 | 2.31624600  |
| C | -3.83447000 | -2.94063700 | 1.68722100  |
| C | -3.37412400 | -3.22136800 | 0.39816100  |
| H | -1.65831000 | -0.36705700 | -0.06826500 |
| H | -2.72020600 | 0.22952500  | 2.04032900  |
| H | -4.34401000 | -3.72889400 | 2.23715500  |
| H | -3.52977700 | -4.21768000 | 0.00042700  |
| C | -4.37124400 | -1.67033500 | -3.16610200 |
| H | -4.99439700 | -1.23130900 | -3.95215100 |
| H | -5.06691000 | -1.97295900 | -2.37362600 |
| C | -3.67350800 | -2.93698100 | -3.68244200 |
| H | -3.06184200 | -2.68754300 | -4.55617400 |
| H | -4.42185700 | -3.65600000 | -4.03281500 |
| C | -2.79452900 | -3.59147700 | -2.59162800 |
| H | -3.41468300 | -4.25363100 | -1.98055000 |
| H | -2.04806200 | -4.23502900 | -3.06703900 |
| C | -3.34448400 | -0.60193700 | -2.65207100 |
| H | -3.29305100 | 0.23081900  | -3.36394800 |

|    |             |             |             |
|----|-------------|-------------|-------------|
| Si | -3.86137900 | 0.15222300  | -0.98435800 |
| C  | -3.44034000 | 1.95421900  | -0.76895300 |
| C  | -2.39021300 | 2.54387900  | -1.50205300 |
| C  | -4.20697200 | 2.78188400  | 0.07666500  |
| C  | -2.12486700 | 3.90943100  | -1.40205600 |
| H  | -1.75577600 | 1.94432600  | -2.14707500 |
| C  | -3.93949100 | 4.14597800  | 0.18010000  |
| H  | -5.02546500 | 2.36683400  | 0.65808300  |
| C  | -2.89980100 | 4.71065200  | -0.56163100 |
| H  | -1.31036000 | 4.33629600  | -1.97716500 |
| H  | -4.54173200 | 4.76682600  | 0.83683700  |
| H  | -2.69088900 | 5.77347500  | -0.48161000 |
| C  | -5.60413900 | -0.24681900 | -0.40349300 |
| H  | -5.74999500 | -1.31751600 | -0.24052900 |
| H  | -5.84937800 | 0.27084300  | 0.52705500  |
| H  | -6.32194100 | 0.07684400  | -1.16570300 |
| C  | -1.93128500 | -1.22706700 | -2.51898700 |
| H  | -1.20577000 | -0.54168900 | -2.07602800 |
| H  | -1.52193500 | -1.46741000 | -3.50416000 |
| B  | 1.44911400  | -0.08792800 | 0.08754500  |
| C  | 1.70214700  | 1.50418900  | -0.22880400 |
| C  | 2.37907700  | 2.39519500  | 0.60832000  |
| C  | 1.23013000  | 2.07389400  | -1.41126300 |
| C  | 2.57236200  | 3.74393900  | 0.30794900  |
| C  | 1.39192200  | 3.41359100  | -1.74999100 |
| C  | 2.06905700  | 4.26119300  | -0.88084400 |
| C  | 2.59938600  | -0.98075200 | -0.66280400 |
| C  | 2.30299300  | -1.91477200 | -1.65358100 |
| C  | 3.96614700  | -0.81458600 | -0.42167100 |
| C  | 3.26457400  | -2.64281600 | -2.35360900 |
| C  | 4.96487600  | -1.51525400 | -1.09147900 |
| C  | 4.60955800  | -2.44019300 | -2.07019200 |
| C  | 1.22889400  | -0.37886700 | 1.68908000  |
| C  | 0.16583100  | 0.25618800  | 2.33475000  |
| C  | 1.92969400  | -1.26974200 | 2.50524600  |
| C  | -0.21258500 | 0.02462200  | 3.65174900  |
| C  | 1.59855200  | -1.52490800 | 3.83896100  |
| C  | 0.51424200  | -0.87789400 | 4.42024600  |
| F  | 0.54113100  | 1.31865200  | -2.31161600 |
| F  | 0.85790100  | 3.90894300  | -2.88812900 |
| F  | 2.22504600  | 5.55922700  | -1.18266200 |
| F  | 3.22641300  | 4.55094800  | 1.15825600  |
| F  | 2.87436900  | 1.98055500  | 1.79035600  |
| F  | 4.37354800  | 0.06310000  | 0.51677100  |
| F  | 6.26151000  | -1.31246900 | -0.80860300 |
| F  | 5.55376000  | -3.12740500 | -2.72971400 |
| F  | 2.90319100  | -3.53205100 | -3.29676100 |

|   |             |             |             |
|---|-------------|-------------|-------------|
| F | 1.01377100  | -2.17526600 | -2.00559900 |
| F | -0.61012200 | 1.13935100  | 1.64322500  |
| F | 2.97963400  | -1.96850900 | 2.03075400  |
| F | 2.31085400  | -2.40203600 | 4.56317000  |
| F | 0.16473100  | -1.12680900 | 5.69187800  |
| F | -1.30118200 | 0.63740200  | 4.17582800  |
| H | 0.38222200  | -0.37521000 | -0.42255700 |
| C | -4.11093600 | -1.43654500 | 3.72722100  |
| H | -5.11414700 | -0.99357100 | 3.73648200  |
| H | -4.15628100 | -2.36259700 | 4.30677600  |
| H | -3.43501600 | -0.74468000 | 4.23570600  |
| C | -2.05692500 | -2.53597900 | -1.71076000 |
| H | -1.04256800 | -2.89519900 | -1.49740200 |

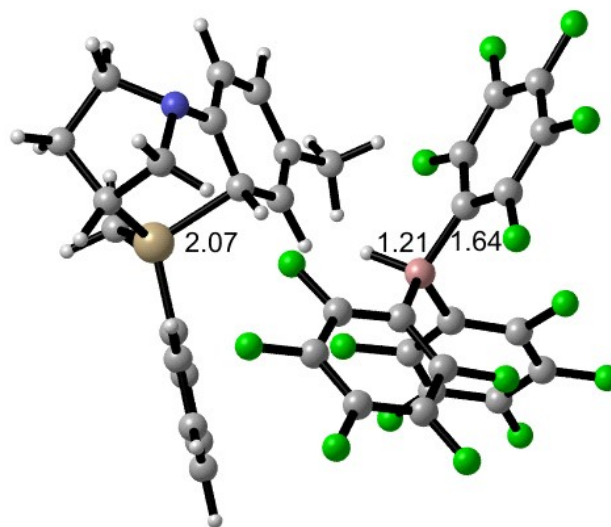

**G2**

**$G_{\text{gas}} = -3251.785705 \text{ a.u.}$**

**$E_{\text{gas}} = -3252.21965686 \text{ a.u.}$**

|    |            |             |             |
|----|------------|-------------|-------------|
| C  | 3.41126300 | -2.25016300 | 0.34265500  |
| C  | 2.62649700 | -1.17606400 | -0.26544300 |
| C  | 1.92129800 | -1.45219900 | -1.50093400 |
| C  | 2.06808300 | -2.63555700 | -2.18384700 |
| C  | 2.90597500 | -3.62026600 | -1.59352900 |
| C  | 3.56457200 | -3.44630700 | -0.38918900 |
| H  | 2.01524000 | -0.56165000 | 0.40352900  |
| H  | 1.23980500 | -0.68544400 | -1.85485800 |
| H  | 3.01579100 | -4.57599200 | -2.10158300 |
| H  | 4.14656300 | -4.26154300 | 0.02571800  |
| N  | 4.06341400 | -2.05341100 | 1.53690200  |
| C  | 4.96830500 | 0.04951100  | 1.16097200  |
| H  | 5.25231900 | 1.03443900  | 1.54262900  |
| Si | 4.09411300 | 0.25231600  | -0.53622100 |
| C  | 3.30092500 | 1.92474300  | -0.74732300 |
| C  | 2.95092800 | 2.70933900  | 0.36957500  |

|   |             |             |             |
|---|-------------|-------------|-------------|
| C | 3.03950000  | 2.44289400  | -2.03062300 |
| C | 2.36432100  | 3.96328400  | 0.20925400  |
| H | 3.10725700  | 2.34256400  | 1.37864100  |
| C | 2.45203300  | 3.69685400  | -2.19226300 |
| H | 3.28817100  | 1.86586800  | -2.91712300 |
| C | 2.11583800  | 4.45889300  | -1.07219300 |
| H | 2.09397500  | 4.54200200  | 1.08688300  |
| H | 2.25039800  | 4.07426000  | -3.19009500 |
| H | 1.65304200  | 5.43337200  | -1.19759300 |
| C | 5.13289600  | -0.25489200 | -2.01946200 |
| H | 4.55959100  | -0.17623400 | -2.94742700 |
| H | 6.00455100  | 0.40205000  | -2.11098200 |
| H | 5.48984400  | -1.28559400 | -1.93866400 |
| C | 3.98395400  | -0.69388400 | 2.10110500  |
| H | 2.96485600  | -0.31764800 | 2.14664900  |
| H | 4.36420300  | -0.73607700 | 3.12701400  |
| B | -1.33873700 | -0.07067100 | 0.19650100  |
| C | -1.96779800 | -1.46485000 | 0.78350100  |
| C | -2.80279900 | -1.60438600 | 1.89335300  |
| C | -1.64976700 | -2.66962700 | 0.15191900  |
| C | -3.27011100 | -2.83349800 | 2.36000500  |
| C | -2.09288600 | -3.91897200 | 0.57567200  |
| C | -2.91374900 | -4.00212800 | 1.69567000  |
| C | -2.05783300 | 0.39384100  | -1.20705600 |
| C | -1.31267000 | 0.96316100  | -2.24026700 |
| C | -3.41791900 | 0.24938100  | -1.49576700 |
| C | -1.84098800 | 1.35264200  | -3.46849600 |
| C | -3.99582500 | 0.62553800  | -2.70806200 |
| C | -3.20094400 | 1.18406000  | -3.70408400 |
| C | -1.25820300 | 1.17841100  | 1.26332300  |
| C | -0.07363700 | 1.49353700  | 1.92237300  |
| C | -2.30121200 | 2.07245700  | 1.52828200  |
| C | 0.11181000  | 2.60714900  | 2.73595600  |
| C | -2.17648600 | 3.19391600  | 2.34672500  |
| C | -0.95356600 | 3.47138500  | 2.95203900  |
| F | -0.85371300 | -2.66822800 | -0.95156400 |
| F | -1.73509700 | -5.03940700 | -0.08047800 |
| F | -3.35334700 | -5.19399500 | 2.12881600  |
| F | -4.06380400 | -2.90074900 | 3.44165000  |
| F | -3.20481300 | -0.52202500 | 2.59143300  |
| F | -4.25487500 | -0.28232400 | -0.58457500 |
| F | -5.31010000 | 0.45781900  | -2.92554000 |
| F | -3.73746800 | 1.55258000  | -4.87742200 |
| F | -1.05397200 | 1.88577100  | -4.42291100 |
| F | 0.02984700  | 1.15827600  | -2.09621000 |
| F | 1.03624800  | 0.69857200  | 1.78395100  |
| F | -3.51167400 | 1.87803400  | 0.97544500  |

|   |             |             |             |
|---|-------------|-------------|-------------|
| F | -3.21690300 | 4.01578900  | 2.55272400  |
| F | -0.80373000 | 4.55643000  | 3.72664300  |
| F | 1.31921300  | 2.86874300  | 3.28564900  |
| H | -0.19483700 | -0.33118600 | -0.08541300 |
| C | 1.28620400  | -2.94271700 | -3.43577200 |
| H | 1.87884600  | -3.51887200 | -4.15324300 |
| H | 0.39590200  | -3.52909300 | -3.18306700 |
| H | 0.94577200  | -2.02699300 | -3.92442800 |
| C | 5.52648000  | -2.32701000 | 1.55148900  |
| H | 5.78251600  | -3.12516600 | 0.85723200  |
| H | 5.81174600  | -2.64242400 | 2.55767400  |
| C | 6.17054200  | -0.94797000 | 1.17290800  |
| H | 6.90770500  | -0.65000200 | 1.92493000  |
| H | 6.69643700  | -1.00642600 | 0.21656600  |

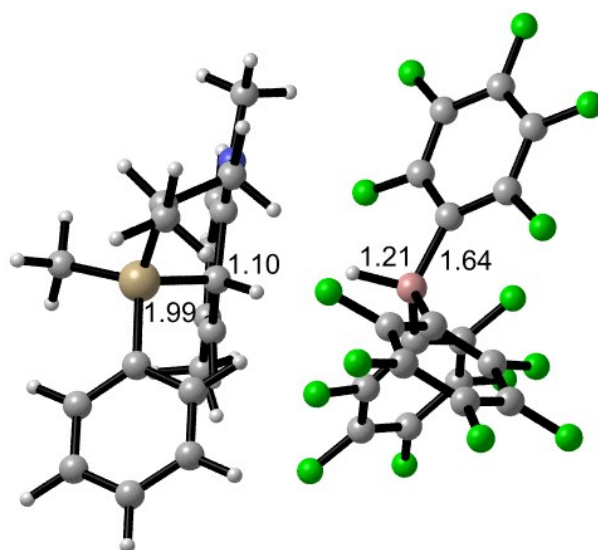

G3

$G_{\text{gas}} = -3253.003190 \text{ a.u.}$

$E_{\text{gas}} = -3253.45676743 \text{ a.u.}$

|    |             |             |             |
|----|-------------|-------------|-------------|
| C  | -1.76943400 | -2.71157000 | -0.53864200 |
| C  | -2.27150000 | -1.44474900 | 0.02811000  |
| C  | -2.63686000 | -1.44661500 | 1.44740700  |
| C  | -2.64898800 | -2.57383100 | 2.21425000  |
| C  | -2.21576600 | -3.79001600 | 1.58897500  |
| C  | -1.78397100 | -3.87327300 | 0.28895600  |
| H  | -1.57556700 | -0.61406200 | -0.17744700 |
| H  | -2.87557500 | -0.48268600 | 1.88494700  |
| H  | -2.19799000 | -4.69609200 | 2.19100200  |
| H  | -1.42044900 | -4.81942600 | -0.08970900 |
| N  | -1.35968200 | -2.74725200 | -1.81195600 |
| Si | -3.77017900 | -0.84433500 | -1.13447800 |
| C  | -4.22186100 | 0.92755700  | -0.73737600 |
| C  | -3.39643600 | 1.99255000  | -1.15031700 |
| C  | -5.40124500 | 1.23997900  | -0.03368000 |



|   |             |             |             |   |             |             |             |
|---|-------------|-------------|-------------|---|-------------|-------------|-------------|
| C | -3.73450500 | 3.31633200  | -0.87179500 | F | 0.55244500  | -0.37364000 | 5.70383800  |
| H | -2.47343000 | 1.80321300  | -1.68747600 | F | -1.44296300 | 0.58525800  | 4.07445300  |
| C | -5.74118600 | 2.56410800  | 0.24691000  | H | 0.35186000  | -0.13835400 | -0.46239900 |
| H | -6.06769900 | 0.44752400  | 0.29724300  | C | -3.03094500 | -2.56259200 | 3.67417700  |
| C | -4.90815600 | 3.60353600  | -0.17208500 | H | -4.03957000 | -2.96438700 | 3.82971100  |
| H | -3.07632400 | 4.11288000  | -1.20568000 | H | -2.34310200 | -3.17591400 | 4.26527900  |
| H | -6.65581500 | 2.78392000  | 0.79014500  | H | -2.99973500 | -1.54723400 | 4.07543000  |
| H | -5.17362700 | 4.63398500  | 0.04621900  | C | -0.73688300 | -3.95041900 | -2.37661500 |
| C | -5.21989100 | -2.02125800 | -0.88750400 | H | -1.39622200 | -4.81808200 | -2.28098100 |
| H | -4.93547600 | -3.05623200 | -1.10025100 | H | -0.55306600 | -3.78170700 | -3.43640400 |
| H | -5.58753500 | -1.98487900 | 0.14255400  | H | 0.21759500  | -4.15115800 | -1.88166000 |
| H | -6.05248300 | -1.76048800 | -1.54882700 | C | -2.90008900 | -1.04064900 | -2.82899600 |
| C | -1.44179000 | -1.52164400 | -2.63279800 | H | -2.82399200 | -0.03176100 | -3.25350300 |
| H | -0.83239800 | -0.74015800 | -2.16841100 | C | -3.67053000 | -1.93011000 | -3.82315300 |
| H | -0.98661900 | -1.75095500 | -3.59882100 | H | -4.68530300 | -1.55882500 | -3.99652200 |
| B | 1.38740900  | 0.32510900  | -0.02788000 | H | -3.16330500 | -1.95902700 | -4.79500700 |
| C | 1.38463900  | 1.90525100  | -0.45066700 | H | -3.75886300 | -2.96174700 | -3.46548400 |
| C | 2.16468600  | 2.87716700  | 0.18118300  |   |             |             |             |
| C | 0.48762600  | 2.41122300  | -1.38712600 |   |             |             |             |
| C | 2.05083500  | 4.24303000  | -0.06882100 |   |             |             |             |
| C | 0.31255900  | 3.76669900  | -1.65208100 |   |             |             |             |
| C | 1.10670700  | 4.69431400  | -0.98845200 |   |             |             |             |
| C | 2.56141500  | -0.59945100 | -0.69376300 |   |             |             |             |
| C | 2.35208500  | -1.97333400 | -0.81874000 |   |             |             |             |
| C | 3.77394200  | -0.16027200 | -1.22940700 |   |             |             |             |
| C | 3.22552000  | -2.85151600 | -1.44945700 |   |             |             |             |
| C | 4.68946000  | -1.00243700 | -1.86373700 |   |             |             |             |
| C | 4.41392900  | -2.36123000 | -1.98005400 |   |             |             |             |
| C | 1.25887700  | 0.17881200  | 1.60189700  |   |             |             |             |
| C | 0.04941600  | 0.50241000  | 2.21757400  |   |             |             |             |
| C | 2.23794900  | -0.29504800 | 2.47677800  |   |             |             |             |
| C | -0.21880000 | 0.31557600  | 3.56915400  |   |             |             |             |
| C | 2.02464400  | -0.48149800 | 3.84399000  |   |             |             |             |
| C | 0.78307400  | -0.18165300 | 4.39604400  |   |             |             |             |
| F | -0.32079800 | 1.57065500  | -2.10039500 |   |             |             |             |
| F | -0.63449200 | 4.18276500  | -2.51871800 |   |             |             |             |
| F | 0.96317100  | 6.00590300  | -1.22775700 |   |             |             |             |
| F | 2.82634400  | 5.13022500  | 0.57318400  |   |             |             |             |
| F | 3.07719600  | 2.50687400  | 1.09981900  |   |             |             |             |
| F | 4.12225100  | 1.13985800  | -1.16605100 |   |             |             |             |
| F | 5.83379600  | -0.51431400 | -2.36711700 |   |             |             |             |
| F | 5.27615900  | -3.18375300 | -2.59537000 |   |             |             |             |
| F | 2.91716800  | -4.16150900 | -1.56309800 |   |             |             |             |
| F | 1.21582200  | -2.53697400 | -0.31906300 |   |             |             |             |
| F | -0.97488500 | 1.00499500  | 1.47282200  |   |             |             |             |
| F | 3.46393200  | -0.61900400 | 2.02182300  |   |             |             |             |
| F | 3.00227400  | -0.95452900 | 4.63285500  |   |             |             |             |

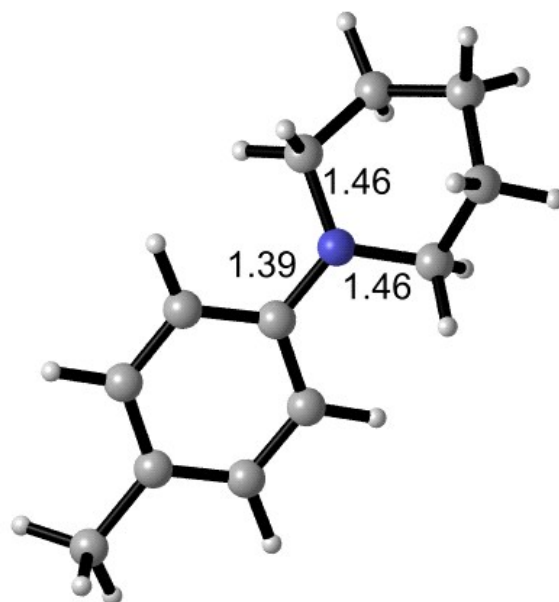

**H**

**$G_{\text{gas}} = -522.053370$  a.u.**

**$E_{\text{gas}} = -522.280258096$  a.u.**

|   |             |             |             |
|---|-------------|-------------|-------------|
| C | -0.39665600 | 0.00157500  | -0.00244700 |
| C | -1.13497000 | 1.16362700  | 0.31410900  |
| C | -2.52739000 | 1.15387200  | 0.30177000  |
| C | -3.26062500 | 0.00255700  | -0.00868400 |
| C | -2.52684500 | -1.14791100 | -0.32144100 |
| C | -1.13452900 | -1.15902300 | -0.32609700 |
| H | -0.62173700 | 2.07634300  | 0.59481500  |
| H | -3.05616400 | 2.07102500  | 0.55338600  |
| H | -3.05533200 | -2.06201800 | -0.58461300 |
| H | -0.62046500 | -2.06844900 | -0.61587600 |
| N | 0.99317800  | 0.00073100  | -0.00049900 |

|   |             |             |             |
|---|-------------|-------------|-------------|
| C | 1.74751300  | 1.25139900  | -0.03004500 |
| H | 1.89754500  | 1.66675800  | 0.98217600  |
| H | 1.17020400  | 1.99376900  | -0.59092600 |
| C | 3.10265500  | 1.04861700  | -0.71731300 |
| H | 3.62412900  | 2.00998900  | -0.77788700 |
| H | 2.91222400  | 0.73018900  | -1.74897800 |
| C | 3.97273200  | -0.00242500 | 0.00543800  |
| H | 4.62859800  | 0.48389100  | 0.73636300  |
| H | 4.63104700  | -0.48991100 | -0.72250100 |
| C | 3.09748300  | -1.05193800 | 0.72415400  |
| H | 2.90337800  | -0.73351800 | 1.75513900  |
| H | 3.61668000  | -2.01442800 | 0.78650000  |
| C | 1.74481400  | -1.25150200 | 0.03111800  |
| H | 1.89824300  | -1.66643800 | -0.98079200 |
| H | 1.16345600  | -1.99302000 | 0.58895100  |
| C | -4.77105500 | -0.00590000 | 0.01946500  |
| H | -5.18115300 | -0.72726500 | -0.69500900 |
| H | -5.15926200 | -0.27798800 | 1.01009900  |
| H | -5.18240500 | 0.97826500  | -0.22750900 |

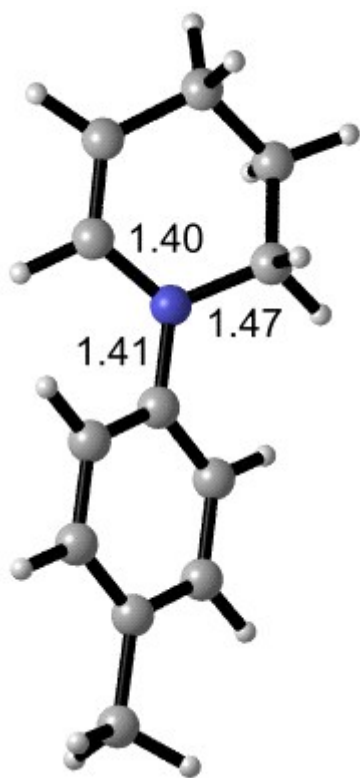

I

$G_{\text{gas}} = -520.856956 \text{ a.u.}$

$E_{\text{gas}} = -521.060895856 \text{ a.u.}$

|   |             |             |             |
|---|-------------|-------------|-------------|
| C | -0.35292500 | -0.01280400 | -0.09167500 |
| C | -1.05078000 | 1.15168800  | 0.26786800  |
| C | -2.44491300 | 1.16004500  | 0.31818900  |
| C | -3.19714700 | 0.01449800  | 0.04022000  |

|   |             |             |             |
|---|-------------|-------------|-------------|
| C | -2.49304200 | -1.15058800 | -0.29844400 |
| C | -1.10446700 | -1.16826100 | -0.37344400 |
| H | -0.50158900 | 2.04820800  | 0.53566000  |
| H | -2.95498500 | 2.07785100  | 0.60178200  |
| H | -3.04386300 | -2.06099000 | -0.52426100 |
| H | -0.59898300 | -2.08001900 | -0.67553300 |
| N | 1.05867000  | -0.03925100 | -0.18148800 |
| C | 3.09310200  | 1.28146600  | -0.29105900 |
| H | 3.54836500  | 2.21820700  | -0.59545800 |
| C | 3.96350100  | 0.16946300  | 0.23592900  |
| H | 4.21273200  | 0.32510100  | 1.29674100  |
| H | 4.92386500  | 0.15327500  | -0.29512000 |
| C | 3.24625700  | -1.17755700 | 0.05375000  |
| H | 3.75500000  | -1.97554300 | 0.60555200  |
| H | 3.25706800  | -1.45496400 | -1.00674700 |
| C | 1.79247800  | -1.09680000 | 0.52781300  |
| H | 1.29029800  | -2.05254800 | 0.36341700  |
| H | 1.76567200  | -0.89911700 | 1.61184800  |
| C | 1.76964600  | 1.12545600  | -0.47154700 |
| H | 1.17158200  | 1.91183900  | -0.91910200 |
| C | -4.70696600 | 0.03033200  | 0.08256800  |
| H | -5.13741900 | 0.06726800  | -0.92634500 |
| H | -5.10553400 | -0.86676700 | 0.56842300  |
| H | -5.08135900 | 0.90131800  | 0.62855900  |

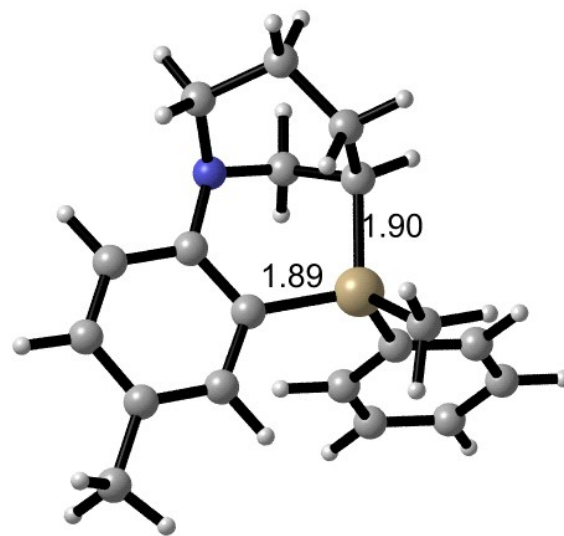

J

$G_{\text{gas}} = -1081.836238 \text{ a.u.}$

$E_{\text{gas}} = -1082.16254552 \text{ a.u.}$

|   |            |            |             |
|---|------------|------------|-------------|
| C | 1.80118300 | 0.09741800 | -0.68783600 |
| C | 0.80436900 | 0.66135600 | 0.15049000  |
| C | 0.97664500 | 1.99130800 | 0.58245400  |
| C | 2.08926000 | 2.76723400 | 0.25316000  |
| C | 3.07668400 | 2.16784300 | -0.54496100 |
| C | 2.93445400 | 0.86887100 | -1.01305700 |

|    |             |             |             |
|----|-------------|-------------|-------------|
| H  | 0.21703900  | 2.43591300  | 1.22476100  |
| H  | 3.96142900  | 2.73757900  | -0.82185400 |
| H  | 3.68984400  | 0.44257000  | -1.66715800 |
| N  | 1.70329700  | -1.20462400 | -1.23925400 |
| C  | 1.13966300  | -2.71756900 | 1.01296000  |
| H  | 0.79159300  | -3.49529800 | 1.70082000  |
| H  | 1.61174800  | -1.95125500 | 1.64222900  |
| C  | 2.21738800  | -3.28287700 | 0.07104900  |
| H  | 1.79625500  | -4.11219000 | -0.51026900 |
| H  | 3.05136600  | -3.70401700 | 0.64429900  |
| C  | 2.75424800  | -2.18292400 | -0.88141000 |
| H  | 3.57034600  | -1.63962800 | -0.39752500 |
| H  | 3.16516300  | -2.64523600 | -1.78989400 |
| C  | -0.06879600 | -2.12340300 | 0.22070000  |
| H  | -0.90582800 | -2.83204100 | 0.21061300  |
| Si | -0.59494700 | -0.40311100 | 0.83872800  |
| C  | -2.26987000 | 0.07984700  | 0.09771100  |
| C  | -2.38185800 | 1.02395600  | -0.93946700 |
| C  | -3.45746700 | -0.51878800 | 0.56207200  |
| C  | -3.62207400 | 1.35460500  | -1.49102600 |
| H  | -1.48646400 | 1.51071700  | -1.31713400 |
| C  | -4.69933600 | -0.19432400 | 0.01527100  |
| H  | -3.41760900 | -1.25221600 | 1.36531400  |
| C  | -4.78357100 | 0.74535400  | -1.01491600 |
| H  | -3.68074200 | 2.08811000  | -2.29081400 |
| H  | -5.60016000 | -0.67157300 | 0.39197400  |
| H  | -5.74943100 | 1.00111600  | -1.44208900 |
| C  | -0.68918100 | -0.26551300 | 2.72421900  |
| H  | -0.86831700 | 0.76949400  | 3.03353400  |
| H  | -1.50715200 | -0.87349700 | 3.12620500  |
| H  | 0.24023100  | -0.59814100 | 3.19690800  |
| C  | 0.38088500  | -1.82544200 | -1.23362000 |
| H  | -0.32573700 | -1.16792700 | -1.75323500 |
| H  | 0.44318000  | -2.73960600 | -1.83615800 |
| C  | 2.23085900  | 4.19450000  | 0.72759000  |
| H  | 3.20094500  | 4.36571900  | 1.20830800  |
| H  | 2.15665900  | 4.90588400  | -0.10448700 |
| H  | 1.45091100  | 4.45273000  | 1.44992700  |

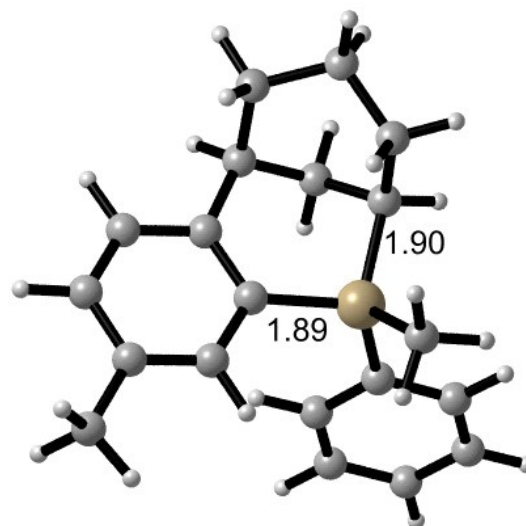

**J1**

**G<sub>gas</sub> = -1065.801046 a.u.**

**E<sub>gas</sub> = -1066.13769825 a.u.**

|    |             |             |             |
|----|-------------|-------------|-------------|
| C  | 1.76816500  | 0.22372300  | -0.73607900 |
| C  | 0.82737700  | 0.65207500  | 0.22869100  |
| C  | 0.93484900  | 1.96109800  | 0.73931800  |
| C  | 1.92669900  | 2.85747000  | 0.33555900  |
| C  | 2.84606000  | 2.41289100  | -0.62526900 |
| C  | 2.76391500  | 1.12633100  | -1.14606500 |
| H  | 0.21398500  | 2.29894800  | 1.48274100  |
| H  | 3.62929300  | 3.08381300  | -0.97217300 |
| H  | 3.48729400  | 0.81055500  | -1.89532600 |
| C  | 1.13694500  | -2.83074000 | 0.97162200  |
| H  | 0.74908500  | -3.67682800 | 1.54979000  |
| H  | 1.54164300  | -2.12709700 | 1.71238500  |
| C  | 2.30280500  | -3.28134000 | 0.08067000  |
| H  | 1.95926500  | -4.05989600 | -0.61196400 |
| H  | 3.08930300  | -3.74214900 | 0.69036700  |
| C  | 2.88952800  | -2.09353300 | -0.70358400 |
| H  | 3.50554200  | -1.48939600 | -0.02826900 |
| H  | 3.56420000  | -2.46848400 | -1.48183000 |
| C  | -0.01880600 | -2.17843700 | 0.14427600  |
| H  | -0.87721000 | -2.86041900 | 0.11704000  |
| Si | -0.54956800 | -0.49129100 | 0.83397700  |
| C  | -2.21606500 | 0.02713300  | 0.09292200  |
| C  | -3.40741500 | -0.59316200 | 0.51780600  |
| C  | -2.31996200 | 1.01271300  | -0.90574200 |
| C  | -4.64419900 | -0.24981400 | -0.02919000 |
| H  | -3.37481700 | -1.35899300 | 1.29048900  |
| C  | -3.55482400 | 1.36241300  | -1.45752900 |
| H  | -1.42292900 | 1.51815300  | -1.25347600 |
| C  | -4.71999600 | 0.73125200  | -1.02052700 |
| H  | -5.54757500 | -0.74467400 | 0.31755900  |

|   |             |             |             |
|---|-------------|-------------|-------------|
| H | -3.60656100 | 2.12820000  | -2.22703900 |
| H | -5.68173200 | 1.00203100  | -1.44778500 |
| C | -0.69110400 | -0.45731300 | 2.72228000  |
| H | 0.23909500  | -0.77392000 | 3.20396500  |
| H | -0.92554800 | 0.55084800  | 3.07976600  |
| H | -1.49064900 | -1.12032600 | 3.07101100  |
| C | 0.42454200  | -1.89293100 | -1.31483500 |
| H | -0.33041800 | -1.29127100 | -1.83605900 |
| H | 0.50419100  | -2.82768700 | -1.88390700 |
| C | 2.01343800  | 4.25319500  | 0.90730400  |
| H | 2.95368500  | 4.40600200  | 1.45056700  |
| H | 1.97306800  | 5.01315200  | 0.11828200  |
| H | 1.19274000  | 4.45104000  | 1.60258900  |
| C | 1.78684900  | -1.17712000 | -1.35429800 |
| H | 2.05619400  | -1.03894000 | -2.40836400 |

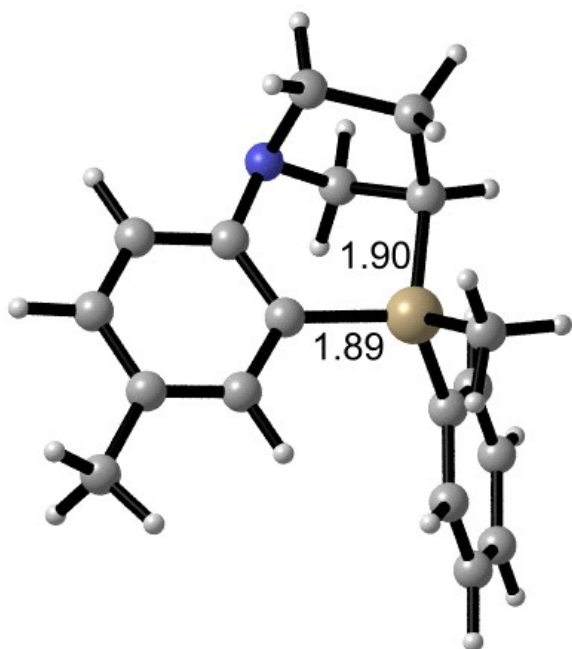

**J2**

$G_{\text{gas}} = -1042.546744 \text{ a.u.}$

$E_{\text{gas}} = -1042.84422383 \text{ a.u.}$

|   |             |             |             |
|---|-------------|-------------|-------------|
| C | 1.94879900  | -0.31821200 | -0.67159000 |
| C | 0.99516800  | 0.39076000  | 0.09572800  |
| C | 1.23895100  | 1.75139900  | 0.35635600  |
| C | 2.38571500  | 2.41640200  | -0.08748700 |
| C | 3.32520900  | 1.67672600  | -0.82064300 |
| C | 3.10659800  | 0.33480200  | -1.11469600 |
| H | 0.51610400  | 2.31833500  | 0.94172800  |
| H | 4.23016800  | 2.16304200  | -1.17850200 |
| H | 3.82114500  | -0.22877200 | -1.70741700 |
| N | 1.80630700  | -1.70977100 | -1.02850100 |
| C | -0.13027400 | -2.30664400 | 0.24194600  |
| H | -1.01203700 | -2.95422500 | 0.29399700  |

|    |             |             |             |
|----|-------------|-------------|-------------|
| Si | -0.48652900 | -0.53403800 | 0.82649000  |
| C  | -2.13684500 | 0.08987600  | 0.13114900  |
| C  | -2.91972400 | -0.68111500 | -0.74760000 |
| C  | -2.63160800 | 1.35921300  | 0.48925400  |
| C  | -4.13505400 | -0.20938500 | -1.24894800 |
| H  | -2.58296100 | -1.66960300 | -1.04856600 |
| C  | -3.84326100 | 1.83908700  | -0.00858300 |
| H  | -2.06626000 | 1.98918000  | 1.17266000  |
| C  | -4.59927000 | 1.05381300  | -0.88138900 |
| H  | -4.71833100 | -0.82852600 | -1.92530600 |
| H  | -4.19852600 | 2.82318500  | 0.28521800  |
| H  | -5.54399800 | 1.42379400  | -1.27011700 |
| C  | -0.52049400 | -0.33484400 | 2.70836500  |
| H  | -0.69311200 | 0.70846100  | 2.99390300  |
| H  | -1.32571400 | -0.93255100 | 3.14922100  |
| H  | 0.42493800  | -0.64508000 | 3.16423900  |
| C  | 0.41274600  | -2.13944100 | -1.20669000 |
| H  | -0.13067800 | -1.41884900 | -1.82466300 |
| H  | 0.41540100  | -3.09959800 | -1.74143500 |
| C  | 2.60420600  | 3.88431000  | 0.19643300  |
| H  | 3.62597100  | 4.07955700  | 0.53984100  |
| H  | 2.44560600  | 4.49350300  | -0.70219100 |
| H  | 1.91634000  | 4.24934000  | 0.96475800  |
| C  | 2.30568600  | -2.63576300 | 0.01564100  |
| H  | 3.15655500  | -2.19155700 | 0.53613600  |
| H  | 2.65286000  | -3.55429100 | -0.47173900 |
| C  | 1.09587600  | -2.95168700 | 0.95778300  |
| H  | 0.96299800  | -4.03440000 | 1.05898600  |
| H  | 1.25623800  | -2.56180200 | 1.96773100  |

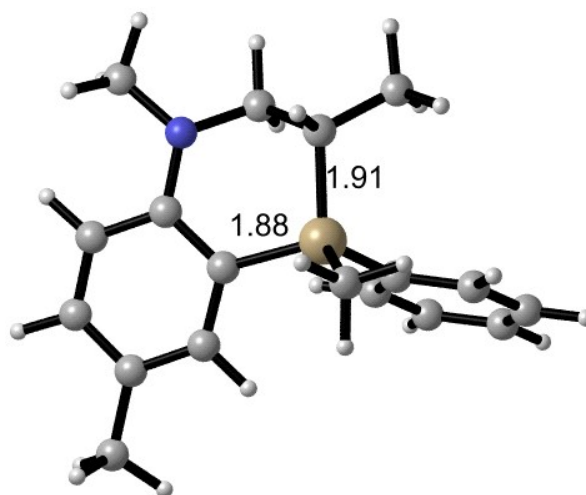

**J3**

$G_{\text{gas}} = -1043.750692 \text{ a.u.}$

$E_{\text{gas}} = -1044.06584505 \text{ a.u.}$

|   |            |             |             |
|---|------------|-------------|-------------|
| C | 2.09953500 | -0.50898600 | -0.25515100 |
|---|------------|-------------|-------------|

|    |             |             |             |
|----|-------------|-------------|-------------|
| C  | 1.07409500  | 0.28812400  | 0.32785700  |
| C  | 1.31974200  | 1.65731900  | 0.52835600  |
| C  | 2.52398700  | 2.28412600  | 0.19976500  |
| C  | 3.51795500  | 1.47688900  | -0.36585000 |
| C  | 3.31824400  | 0.12018300  | -0.59570500 |
| H  | 0.52988900  | 2.26706900  | 0.96634500  |
| H  | 4.47121200  | 1.91891700  | -0.64925900 |
| H  | 4.11668900  | -0.44370500 | -1.06168800 |
| N  | 1.91821800  | -1.88319300 | -0.47175500 |
| Si | -0.54304000 | -0.45138200 | 0.93223000  |
| C  | -2.00975600 | 0.35762000  | 0.04443900  |
| C  | -1.85204900 | 0.99281200  | -1.20198400 |
| C  | -3.30756400 | 0.31674900  | 0.59016000  |
| C  | -2.93818400 | 1.55578200  | -1.87537600 |
| H  | -0.86217400 | 1.05950800  | -1.64568100 |
| C  | -4.39785800 | 0.87750500  | -0.07683100 |
| H  | -3.47532900 | -0.15645600 | 1.55503200  |
| C  | -4.21475600 | 1.49847600  | -1.31403400 |
| H  | -2.78706100 | 2.04249900  | -2.83532200 |
| H  | -5.38800200 | 0.83311800  | 0.36909500  |
| H  | -5.06123600 | 1.93790300  | -1.83480600 |
| C  | -0.74404000 | -0.23551000 | 2.80235400  |
| H  | 0.10617600  | -0.68259000 | 3.32810400  |
| H  | -0.79131600 | 0.82220700  | 3.08104500  |
| H  | -1.65508700 | -0.71726300 | 3.17475600  |
| C  | 0.56452300  | -2.38481800 | -0.73558100 |
| H  | 0.11173700  | -1.85652600 | -1.59456600 |
| H  | 0.66366800  | -3.43367400 | -1.03794600 |
| C  | 2.75357000  | 3.75499900  | 0.45595400  |
| H  | 3.42463400  | 3.91867000  | 1.30894300  |
| H  | 3.21031400  | 4.24900900  | -0.40911200 |
| H  | 1.81442400  | 4.27132600  | 0.67629900  |
| C  | 2.99837200  | -2.63316400 | -1.09059300 |
| H  | 3.92655900  | -2.50403300 | -0.52569800 |
| H  | 2.74862900  | -3.69619400 | -1.07153200 |
| H  | 3.19517300  | -2.34684200 | -2.13803500 |
| C  | -1.69219600 | -3.03895200 | 0.21796300  |
| H  | -1.51371000 | -4.09563800 | -0.02133100 |
| H  | -2.35369700 | -3.00985900 | 1.09039600  |
| H  | -2.24264900 | -2.59736600 | -0.61966600 |
| C  | -0.37370400 | -2.29533300 | 0.48187300  |
| H  | 0.14669000  | -2.78132100 | 1.32000000  |

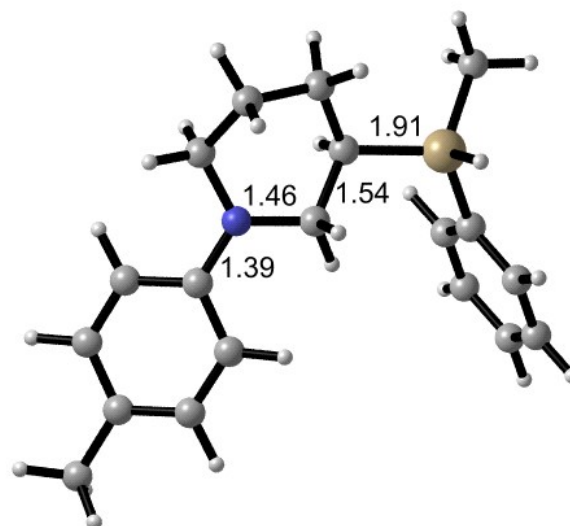

**K**

**G<sub>gas</sub> = -1083.022812 a.u.**

**E<sub>gas</sub> = -1083.36160458 a.u.**

|    |             |             |             |
|----|-------------|-------------|-------------|
| C  | -2.43107200 | -0.43083600 | -0.09172500 |
| C  | -2.43087300 | 0.77415900  | -0.83044900 |
| C  | -3.50614200 | 1.65535700  | -0.76485500 |
| C  | -4.63704700 | 1.39297400  | 0.01846800  |
| C  | -4.64066400 | 0.19359700  | 0.73914500  |
| C  | -3.57125700 | -0.69815100 | 0.69808800  |
| H  | -1.60086600 | 1.01124300  | -1.48626200 |
| H  | -3.46685500 | 2.56847600  | -1.35550900 |
| H  | -5.49857100 | -0.05151900 | 1.36208400  |
| H  | -3.61823900 | -1.59681300 | 1.30248300  |
| C  | 0.96727200  | -3.17188700 | -0.08678300 |
| H  | 1.35164500  | -3.67738000 | 0.80640000  |
| H  | 1.59297000  | -3.51180700 | -0.92251700 |
| C  | -0.49049000 | -3.60423800 | -0.35468400 |
| H  | -0.65277300 | -4.63713800 | -0.02721900 |
| H  | -0.69467300 | -3.58083100 | -1.43149500 |
| C  | -1.50106500 | -2.68660200 | 0.33850900  |
| H  | -2.51552400 | -3.03662200 | 0.11831700  |
| H  | -1.37625700 | -2.75117700 | 1.43451000  |
| C  | 1.08155800  | -1.63503800 | 0.11419400  |
| H  | 0.93993200  | -1.42056700 | 1.18413300  |
| Si | 2.81610800  | -0.98389700 | -0.34024200 |
| C  | 2.94245400  | 0.87716000  | -0.06004900 |
| C  | 2.76481500  | 1.44219900  | 1.21789000  |
| C  | 3.21771600  | 1.75240800  | -1.12665200 |
| C  | 2.85821300  | 2.81896100  | 1.42259600  |
| H  | 2.54917800  | 0.80148200  | 2.07089600  |
| C  | 3.31447800  | 3.13147500  | -0.92834300 |
| H  | 3.35966900  | 1.35180500  | -2.12768800 |
| C  | 3.13436300  | 3.66699400  | 0.34754500  |

|   |             |             |             |    |             |             |             |
|---|-------------|-------------|-------------|----|-------------|-------------|-------------|
| H | 2.71544600  | 3.23072900  | 2.41795000  | C  | 2.88952800  | -2.09353300 | -0.70358400 |
| H | 3.52895500  | 3.78631800  | -1.76855900 | H  | 3.50554200  | -1.48939600 | -0.02826900 |
| H | 3.20754800  | 4.73957100  | 0.50460300  | H  | 3.56420000  | -2.46848400 | -1.48183000 |
| C | -0.04600400 | -0.89028000 | -0.62422700 | C  | -0.01880600 | -2.17843700 | 0.14427600  |
| H | 0.05813200  | -1.03387700 | -1.71387400 | H  | -0.87721000 | -2.86041900 | 0.11704000  |
| H | 0.05185000  | 0.18336400  | -0.43911900 | Si | -0.54956800 | -0.49129100 | 0.83397700  |
| C | -5.78540900 | 2.37116900  | 0.10045300  | C  | -2.21606500 | 0.02713300  | 0.09292200  |
| H | -5.61434700 | 3.13821000  | 0.86758600  | C  | -3.40741500 | -0.59316200 | 0.51780600  |
| H | -5.93445500 | 2.89591400  | -0.84924900 | C  | -2.31996200 | 1.01271300  | -0.90574200 |
| H | -6.72363300 | 1.86678700  | 0.35305400  | C  | -4.64419900 | -0.24981400 | -0.02919000 |
| C | 4.12711800  | -1.91426400 | 0.65629100  | H  | -3.37481700 | -1.35899300 | 1.29048900  |
| H | 4.00782500  | -1.74024800 | 1.73131100  | C  | -3.55482400 | 1.36241300  | -1.45752900 |
| H | 4.06769800  | -2.99384400 | 0.48332900  | H  | -1.42292900 | 1.51815300  | -1.25347600 |
| H | 5.13270700  | -1.58409100 | 0.37693900  | C  | -4.71999600 | 0.73125200  | -1.02052700 |
| H | 3.04081800  | -1.22476200 | -1.79709600 | H  | -5.54757500 | -0.74467400 | 0.31755900  |
| N | -1.36307000 | -1.31851500 | -0.14915700 | H  | -3.60656100 | 2.12820000  | -2.22703900 |
|   |             |             |             | H  | -5.68173200 | 1.00203100  | -1.44778500 |

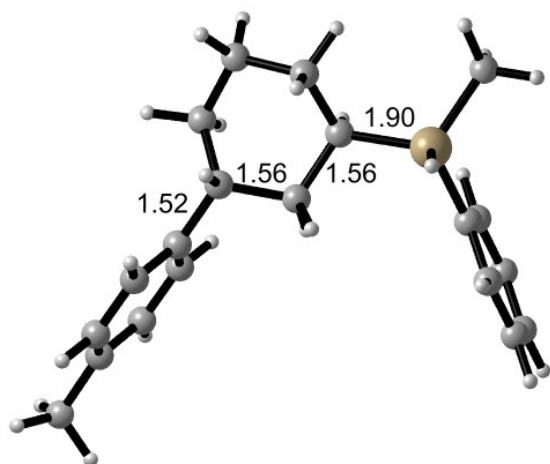

**K1**

**$G_{\text{gas}} = -1065.801046$  a.u.**

**$E_{\text{gas}} = -1066.13769825$  a.u.**

|   |            |             |             |
|---|------------|-------------|-------------|
| C | 1.76816500 | 0.22372300  | -0.73607900 |
| C | 0.82737700 | 0.65207500  | 0.22869100  |
| C | 0.93484900 | 1.96109800  | 0.73931800  |
| C | 1.92669900 | 2.85747000  | 0.33555900  |
| C | 2.84606000 | 2.41289100  | -0.62526900 |
| C | 2.76391500 | 1.12633100  | -1.14606500 |
| H | 0.21398500 | 2.29894800  | 1.48274100  |
| H | 3.62929300 | 3.08381300  | -0.97217300 |
| H | 3.48729400 | 0.81055500  | -1.89532600 |
| C | 1.13694500 | -2.83074000 | 0.97162200  |
| H | 0.74908500 | -3.67682800 | 1.54979000  |
| H | 1.54164300 | -2.12709700 | 1.71238500  |
| C | 2.30280500 | -3.28134000 | 0.08067000  |
| H | 1.95926500 | -4.05989600 | -0.61196400 |
| H | 3.08930300 | -3.74214900 | 0.69036700  |

|    |             |             |             |
|----|-------------|-------------|-------------|
| C  | 2.88952800  | -2.09353300 | -0.70358400 |
| H  | 3.50554200  | -1.48939600 | -0.02826900 |
| H  | 3.56420000  | -2.46848400 | -1.48183000 |
| C  | -0.01880600 | -2.17843700 | 0.14427600  |
| H  | -0.87721000 | -2.86041900 | 0.11704000  |
| Si | -0.54956800 | -0.49129100 | 0.83397700  |
| C  | -2.21606500 | 0.02713300  | 0.09292200  |
| C  | -3.40741500 | -0.59316200 | 0.51780600  |
| C  | -2.31996200 | 1.01271300  | -0.90574200 |
| C  | -4.64419900 | -0.24981400 | -0.02919000 |
| H  | -3.37481700 | -1.35899300 | 1.29048900  |
| C  | -3.55482400 | 1.36241300  | -1.45752900 |
| H  | -1.42292900 | 1.51815300  | -1.25347600 |
| C  | -4.71999600 | 0.73125200  | -1.02052700 |
| H  | -5.54757500 | -0.74467400 | 0.31755900  |
| H  | -3.60656100 | 2.12820000  | -2.22703900 |
| H  | -5.68173200 | 1.00203100  | -1.44778500 |
| C  | -0.69110400 | -0.45731300 | 2.72228000  |
| H  | 0.23909500  | -0.77392000 | 3.20396500  |
| H  | -0.92554800 | 0.55084800  | 3.07976600  |
| H  | -1.49064900 | -1.12032600 | 3.07101100  |
| C  | 0.42454200  | -1.89293100 | -1.31483500 |
| H  | -0.33041800 | -1.29127100 | -1.83605900 |
| H  | 0.50419100  | -2.82768700 | -1.88390700 |
| C  | 2.01343800  | 4.25319500  | 0.90730400  |
| H  | 2.95368500  | 4.40600200  | 1.45056700  |
| H  | 1.97306800  | 5.01315200  | 0.11828200  |
| H  | 1.19274000  | 4.45104000  | 1.60258900  |
| C  | 1.78684900  | -1.17712000 | -1.35429800 |
| H  | 2.05619400  | -1.03894000 | -2.40836400 |

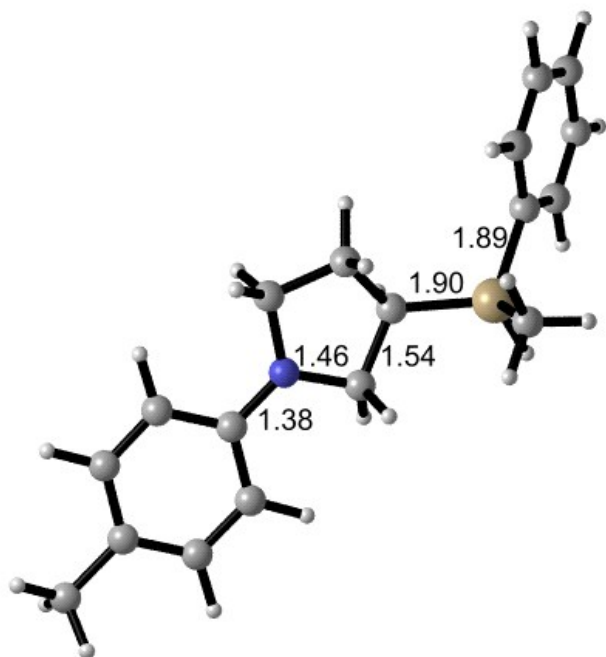

## K2

$G_{\text{gas}} = -1043.741062 \text{ a.u.}$

$E_{\text{gas}} = -1044.05256228 \text{ a.u.}$

|   |             |             |             |
|---|-------------|-------------|-------------|
| C | 4.98865300  | -1.10580000 | 0.43849000  |
| C | 3.60625600  | -1.01311100 | 0.30332500  |
| C | 2.99006300  | 0.22405400  | 0.01175200  |
| C | 3.83103400  | 1.34883700  | -0.13850800 |
| C | 5.21124900  | 1.22944100  | -0.00141800 |
| C | 5.82671500  | 0.00664600  | 0.29332000  |
| H | 5.42637300  | -2.07741600 | 0.65860300  |
| H | 3.00412400  | -1.90876900 | 0.40934300  |
| H | 3.40412600  | 2.32116000  | -0.35828200 |
| H | 5.82575600  | 2.11880300  | -0.12587200 |
| C | 7.32273800  | -0.10210300 | 0.47431600  |
| H | 7.85477100  | 0.63845100  | -0.13184200 |
| H | 7.62098100  | 0.06211300  | 1.51845800  |
| H | 7.69018700  | -1.09298600 | 0.18770000  |
| N | 1.61960500  | 0.32774400  | -0.12737000 |
| C | 0.69508000  | -0.76664900 | 0.15702100  |
| H | 0.92613700  | -1.24451500 | 1.11781000  |
| H | 0.76394500  | -1.55107800 | -0.61624000 |
| C | -0.69188500 | -0.09124100 | 0.18143900  |
| H | -0.83859100 | 0.32663000  | 1.18789500  |
| C | -0.50317600 | 1.09414000  | -0.79212400 |
| H | -1.23422600 | 1.89243100  | -0.63798900 |
| H | -0.58629700 | 0.75952000  | -1.83338700 |
| C | 0.93692200  | 1.55441700  | -0.51838900 |
| H | 1.40218400  | 2.00167800  | -1.40632900 |
| H | 0.96763300  | 2.31158800  | 0.28304100  |

|    |             |             |             |
|----|-------------|-------------|-------------|
| Si | -2.17283600 | -1.24152600 | -0.15376600 |
| H  | -2.10756100 | -2.36355600 | 0.82869300  |
| C  | -3.79227800 | -0.32707700 | 0.16267700  |
| C  | -4.29940300 | 0.61884700  | -0.74889800 |
| C  | -4.52865500 | -0.55725200 | 1.33919700  |
| C  | -5.48552800 | 1.30875900  | -0.49531500 |
| H  | -3.76588600 | 0.82098600  | -1.67534500 |
| C  | -5.71626000 | 0.12967600  | 1.59937400  |
| H  | -4.17253200 | -1.28726500 | 2.06245000  |
| C  | -6.19646500 | 1.06522000  | 0.68186800  |
| H  | -5.85663200 | 2.03316900  | -1.21528500 |
| H  | -6.26710300 | -0.06742000 | 2.51505600  |
| H  | -7.12108900 | 1.59996500  | 0.88081200  |
| C  | -2.11641600 | -1.93944800 | -1.91030200 |
| H  | -2.22350500 | -1.15437000 | -2.66628700 |
| H  | -1.17246900 | -2.45969900 | -2.10385000 |
| H  | -2.92971800 | -2.65639700 | -2.06179900 |

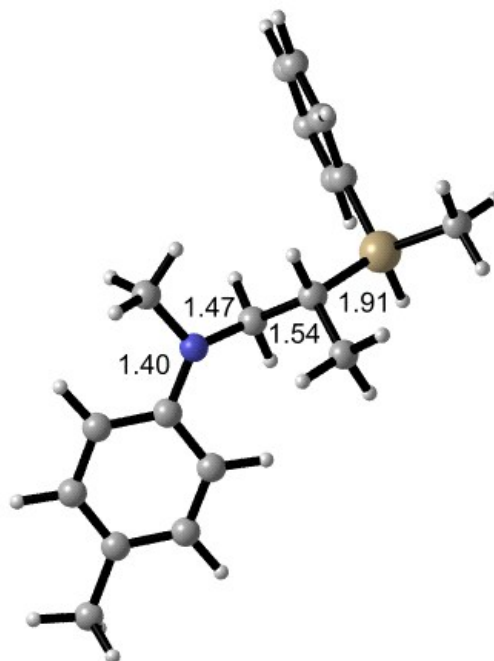

## K3

$G_{\text{gas}} = -1043.750692 \text{ a.u.}$

$E_{\text{gas}} = -1044.06584505 \text{ a.u.}$

|   |            |             |             |
|---|------------|-------------|-------------|
| C | 2.09953500 | -0.50898600 | -0.25515100 |
| C | 1.07409500 | 0.28812400  | 0.32785700  |
| C | 1.31974200 | 1.65731900  | 0.52835600  |
| C | 2.52398700 | 2.28412600  | 0.19976500  |
| C | 3.51795500 | 1.47688900  | -0.36585000 |
| C | 3.31824400 | 0.12018300  | -0.59570500 |
| H | 0.52988900 | 2.26706900  | 0.96634500  |
| H | 4.47121200 | 1.91891700  | -0.64925900 |
| H | 4.11668900 | -0.44370500 | -1.06168800 |

|    |             |             |             |
|----|-------------|-------------|-------------|
| N  | 1.91821800  | -1.88319300 | -0.47175500 |
| Si | -0.54304000 | -0.45138200 | 0.93223000  |
| C  | -2.00975600 | 0.35762000  | 0.04443900  |
| C  | -1.85204900 | 0.99281200  | -1.20198400 |
| C  | -3.30756400 | 0.31674900  | 0.59016000  |
| C  | -2.93818400 | 1.55578200  | -1.87537600 |
| H  | -0.86217400 | 1.05950800  | -1.64568100 |
| C  | -4.39785800 | 0.87750500  | -0.07683100 |
| H  | -3.47532900 | -0.15645600 | 1.55503200  |
| C  | -4.21475600 | 1.49847600  | -1.31403400 |
| H  | -2.78706100 | 2.04249900  | -2.83532200 |
| H  | -5.38800200 | 0.83311800  | 0.36909500  |
| H  | -5.06123600 | 1.93790300  | -1.83480600 |
| C  | -0.74404000 | -0.23551000 | 2.80235400  |
| H  | 0.10617600  | -0.68259000 | 3.32810400  |
| H  | -0.79131600 | 0.82220700  | 3.08104500  |
| H  | -1.65508700 | -0.71726300 | 3.17475600  |
| C  | 0.56452300  | -2.38481800 | -0.73558100 |
| H  | 0.11173700  | -1.85652600 | -1.59456600 |
| H  | 0.66366800  | -3.43367400 | -1.03794600 |
| C  | 2.75357000  | 3.75499900  | 0.45595400  |
| H  | 3.42463400  | 3.91867000  | 1.30894300  |
| H  | 3.21031400  | 4.24900900  | -0.40911200 |
| H  | 1.81442400  | 4.27132600  | 0.67629900  |
| C  | 2.99837200  | -2.63316400 | -1.09059300 |
| H  | 3.92655900  | -2.50403300 | -0.52569800 |
| H  | 2.74862900  | -3.69619400 | -1.07153200 |
| H  | 3.19517300  | -2.34684200 | -2.13803500 |
| C  | -1.69219600 | -3.03895200 | 0.21796300  |
| H  | -1.51371000 | -4.09563800 | -0.02133100 |
| H  | -2.35369700 | -3.00985900 | 1.09039600  |
| H  | -2.24264900 | -2.59736600 | -0.61966600 |
| C  | -0.37370400 | -2.29533300 | 0.48187300  |
| H  | 0.14669000  | -2.78132100 | 1.32000000  |

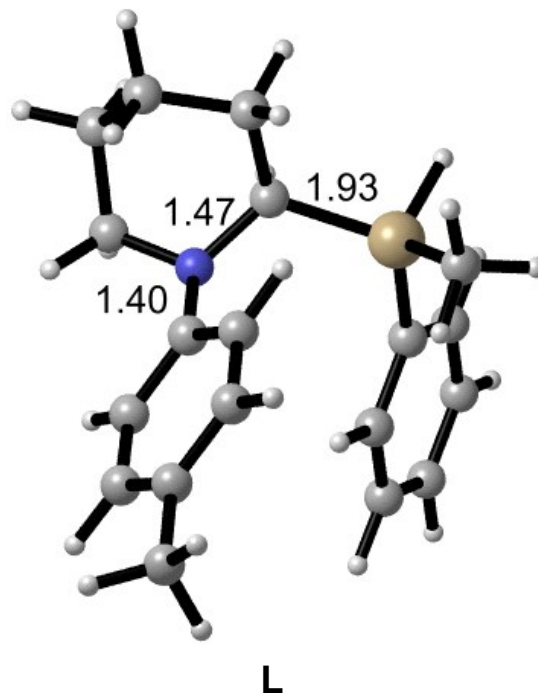

**$G_{\text{gas}} = -1083.009082 \text{ a.u.}$**

**$E_{\text{gas}} = -1083.35033278 \text{ a.u.}$**

|    |             |             |             |
|----|-------------|-------------|-------------|
| C  | -1.40959600 | -0.04047400 | -0.45164400 |
| C  | -1.82704800 | -0.30163700 | 0.86593200  |
| C  | -2.60558300 | -1.42142100 | 1.16714200  |
| C  | -3.02647400 | -2.31623000 | 0.17973200  |
| C  | -2.62452600 | -2.04530800 | -1.13729100 |
| C  | -1.82959500 | -0.94855800 | -1.44985200 |
| H  | -1.57314000 | 0.38834700  | 1.66004500  |
| H  | -2.91078000 | -1.58325600 | 2.19883700  |
| H  | -2.92525400 | -2.71951800 | -1.93667200 |
| H  | -1.50430600 | -0.80057400 | -2.47481100 |
| N  | -0.60056100 | 1.05009700  | -0.79847100 |
| C  | -1.78333700 | 3.41509500  | -0.13596600 |
| H  | -2.10155800 | 4.43426000  | 0.10910900  |
| H  | -2.67026400 | 2.77744900  | -0.03820900 |
| C  | -1.27067500 | 3.33486900  | -1.58064300 |
| H  | -0.36456300 | 3.94582900  | -1.68041700 |
| H  | -2.00094900 | 3.75374600  | -2.28176500 |
| C  | -0.97645000 | 1.86080600  | -1.97133900 |
| H  | -1.87452600 | 1.42052800  | -2.41149500 |
| H  | -0.18713900 | 1.82536300  | -2.73687200 |
| Si | 1.43305400  | 0.92501800  | 1.31944000  |
| C  | 2.47503000  | -0.28669000 | 0.32028000  |
| C  | 3.82785300  | -0.00475000 | 0.05449400  |
| C  | 1.94771200  | -1.49427600 | -0.17708200 |
| C  | 4.62407500  | -0.88856300 | -0.67723700 |
| H  | 4.26825500  | 0.91764300  | 0.42593800  |
| C  | 2.73931800  | -2.38024600 | -0.90848700 |



|   |             |             |             |    |             |             |             |
|---|-------------|-------------|-------------|----|-------------|-------------|-------------|
| H | 0.90582000  | -1.74674900 | 0.00119100  | H  | -2.21790600 | 0.46223800  | 3.97582700  |
| C | 4.07990900  | -2.07919400 | -1.16012600 | N  | -3.24760100 | 1.49251800  | 1.66132600  |
| H | 5.66661800  | -0.64834300 | -0.86818200 | C  | -3.08630900 | 4.13964400  | 0.84753500  |
| H | 2.30987100  | -3.30545200 | -1.28335500 | H  | -3.31510100 | 5.14819900  | 0.49121100  |
| H | 4.69651100  | -2.76969900 | -1.72927000 | H  | -2.01047300 | 4.11616400  | 1.04681200  |
| C | 0.80219200  | 0.13845900  | 2.92004400  | C  | -3.84809700 | 3.84544200  | 2.14580700  |
| H | 0.28321000  | -0.80678400 | 2.74454200  | H  | -4.92964900 | 3.84440700  | 1.96505300  |
| H | 1.65867800  | -0.06029200 | 3.57376600  | H  | -3.66056800 | 4.61923300  | 2.89677500  |
| H | 0.12322800  | 0.80623100  | 3.46188900  | C  | -3.40399300 | 2.49709000  | 2.73372900  |
| C | 0.16768000  | 1.82820000  | 0.18118100  | H  | -2.43215600 | 2.61463600  | 3.22387600  |
| H | 0.90327400  | 2.36343500  | -0.44125800 | H  | -4.11884600 | 2.13010800  | 3.48214400  |
| H | 2.34307800  | 2.04266000  | 1.71597500  | Si | -3.66996200 | 0.13916100  | -0.65481600 |
| C | -3.86186300 | -3.53045600 | 0.51071000  | C  | -5.21677400 | -0.92212100 | -0.60870600 |
| H | -3.27490900 | -4.45584400 | 0.44832600  | C  | -5.65554700 | -1.61207300 | -1.75407100 |
| H | -4.26734300 | -3.46979600 | 1.52511200  | C  | -5.97440900 | -1.05971500 | 0.57130900  |
| H | -4.70563900 | -3.64041700 | -0.17969200 | C  | -6.80342800 | -2.40632200 | -1.72355800 |
| C | -0.69226100 | 2.93759000  | 0.85134200  | H  | -5.09874500 | -1.53186700 | -2.68377000 |
| H | -1.16077900 | 2.59485900  | 1.78140700  | C  | -7.12151300 | -1.85117200 | 0.60666900  |
| H | -0.03439200 | 3.77214200  | 1.12586000  | H  | -5.66831600 | -0.54553100 | 1.48029500  |

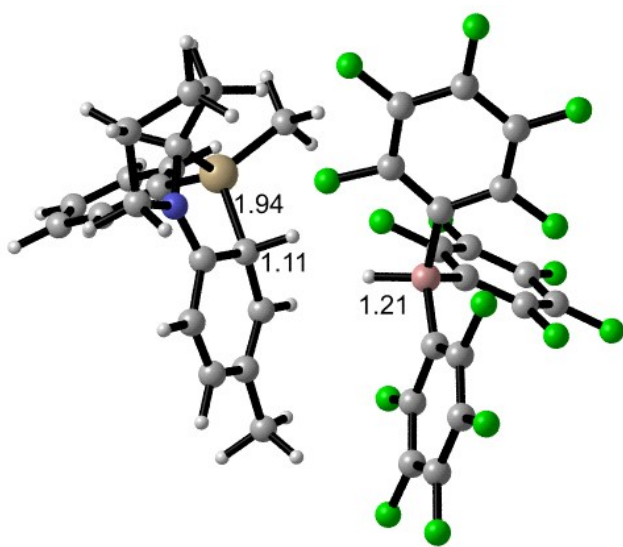

**M**

**$G_{\text{gas}} = -3291.093408 \text{ a.u.}$**

**$E_{\text{gas}} = -3291.55182845 \text{ a.u.}$**

|   |             |             |             |   |            |             |             |
|---|-------------|-------------|-------------|---|------------|-------------|-------------|
| C | -2.58083200 | 0.35210500  | 1.82175600  | C | 2.33210500 | -1.58286100 | 1.87101700  |
| C | -2.31641000 | -0.44806200 | 0.59734300  | C | 3.52484300 | 0.43214100  | 1.85929400  |
| C | -1.92628800 | -1.85650200 | 0.81464500  | C | 2.95210200 | -1.98969700 | 3.04635100  |
| C | -1.63771900 | -2.35304100 | 2.04771800  | C | 4.18350200 | 0.06480400  | 3.03515100  |
| C | -1.71648200 | -1.44580000 | 3.16390700  | C | 3.89621400 | -1.15519800 | 3.63706900  |
| C | -2.14547300 | -0.14481800 | 3.08146800  | C | 1.87148800 | -1.07201900 | -1.31147800 |
| H | -1.41222600 | 0.01648100  | 0.14189600  | C | 3.08705000 | -1.66990800 | -1.65659600 |
| H | -1.76797200 | -2.46375200 | -0.07110200 | C | 0.79955300 | -1.46307400 | -2.11149900 |
| H | -1.42725300 | -1.82595800 | 4.14157900  | C | 3.23042800 | -2.57546400 | -2.70850000 |

|   |             |             |             |    |             |             |             |
|---|-------------|-------------|-------------|----|-------------|-------------|-------------|
| C | 0.88769400  | -2.36135600 | -3.17021400 | C  | 2.89957500  | 1.12074500  | -0.61446200 |
| C | 2.12233900  | -2.92387600 | -3.47499200 | H  | -0.12881800 | 2.91082700  | 1.02735200  |
| C | 1.76447500  | 1.53399500  | -0.64533400 | H  | 3.75876900  | 3.07303400  | -0.76361800 |
| C | 0.71395500  | 2.44027400  | -0.53103700 | H  | 3.75506300  | 0.64689400  | -1.08362100 |
| C | 2.86922600  | 2.03311900  | -1.34268800 | N  | 1.72298800  | -1.02463000 | -0.29614300 |
| C | 0.72529300  | 3.72987400  | -1.05705600 | C  | 1.86360300  | -3.74008100 | 0.19742900  |
| C | 2.93492100  | 3.31539900  | -1.88298700 | H  | 1.69738300  | -4.82291200 | 0.18625300  |
| C | 1.84888500  | 4.17609000  | -1.74052300 | H  | 2.68007000  | -3.55797800 | 0.90694700  |
| F | 3.85899800  | 1.64117900  | 1.35950000  | C  | 2.30337900  | -3.24825500 | -1.18626900 |
| F | 5.08947500  | 0.88336500  | 3.59543700  | H  | 1.49906800  | -3.41635700 | -1.91291500 |
| F | 4.51198100  | -1.51899200 | 4.77268100  | H  | 3.17015000  | -3.81194100 | -1.54775000 |
| F | 2.63665600  | -3.16964300 | 3.61737200  | C  | 2.66778300  | -1.75599000 | -1.13586800 |
| F | 1.42190100  | -2.44677300 | 1.35129500  | H  | 3.67628300  | -1.64673900 | -0.71132400 |
| F | -0.44164600 | 2.09853900  | 0.12154300  | H  | 2.70613300  | -1.33679300 | -2.15644300 |
| F | -0.34593500 | 4.54186200  | -0.91330700 | Si | -0.59930500 | -0.26038100 | 0.84540900  |
| F | 1.88567900  | 5.41321200  | -2.25582600 | C  | -2.29048300 | 0.02963500  | 0.05789100  |
| F | 4.02715900  | 3.73270000  | -2.54039600 | C  | -3.47033000 | -0.49903000 | 0.61389700  |
| F | 3.95234200  | 1.25540600  | -1.51898600 | C  | -2.40654600 | 0.77097600  | -1.13369100 |
| F | -0.45276500 | -0.96798600 | -1.87382100 | C  | -4.71142300 | -0.30561500 | 0.00430100  |
| F | -0.20311000 | -2.68803000 | -3.89034900 | H  | -3.42620900 | -1.06896000 | 1.53891000  |
| F | 2.24141200  | -3.79223900 | -4.49018300 | C  | -3.64424500 | 0.96897900  | -1.74718400 |
| F | 4.42559100  | -3.11747200 | -2.98972100 | H  | -1.51697700 | 1.20763400  | -1.58091300 |
| F | 4.20371000  | -1.39859600 | -0.95569900 | C  | -4.80012100 | 0.42907400  | -1.17927800 |
| H | 0.51541500  | -0.14916100 | 0.29985700  | H  | -5.60776700 | -0.72448900 | 0.45390200  |

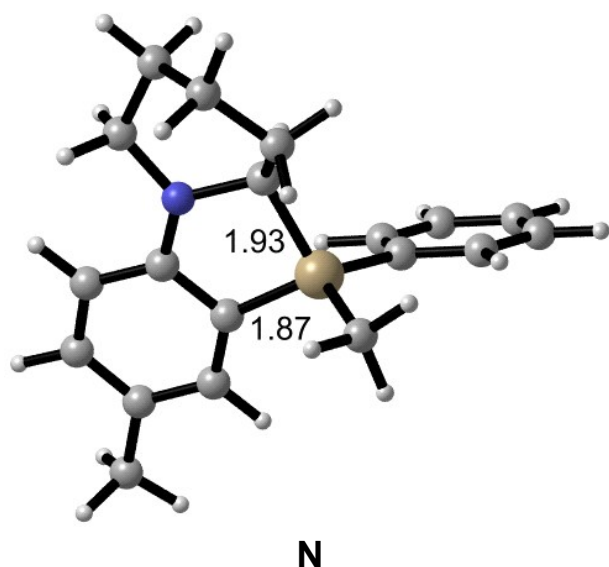

**$G_{\text{gas}} = -1081.846898 \text{ a.u.}$**

**$E_{\text{gas}} = -1082.17203611 \text{ a.u.}$**

|   |            |            |             |
|---|------------|------------|-------------|
| C | 1.79419800 | 0.35851600 | -0.18770200 |
| C | 0.68471000 | 1.01877200 | 0.40519300  |
| C | 0.72336000 | 2.40618900 | 0.57428200  |
| C | 1.81905100 | 3.17673400 | 0.16643900  |
| C | 2.89546500 | 2.50093600 | -0.42867700 |

|    |             |             |             |
|----|-------------|-------------|-------------|
| C  | 2.89957500  | 1.12074500  | -0.61446200 |
| H  | -0.12881800 | 2.91082700  | 1.02735200  |
| H  | 3.75876900  | 3.07303400  | -0.76361800 |
| H  | 3.75506300  | 0.64689400  | -1.08362100 |
| N  | 1.72298800  | -1.02463000 | -0.29614300 |
| C  | 1.86360300  | -3.74008100 | 0.19742900  |
| H  | 1.69738300  | -4.82291200 | 0.18625300  |
| H  | 2.68007000  | -3.55797800 | 0.90694700  |
| C  | 2.30337900  | -3.24825500 | -1.18626900 |
| H  | 1.49906800  | -3.41635700 | -1.91291500 |
| H  | 3.17015000  | -3.81194100 | -1.54775000 |
| C  | 2.66778300  | -1.75599000 | -1.13586800 |
| H  | 3.67628300  | -1.64673900 | -0.71132400 |
| H  | 2.70613300  | -1.33679300 | -2.15644300 |
| Si | -0.59930500 | -0.26038100 | 0.84540900  |
| C  | -2.29048300 | 0.02963500  | 0.05789100  |
| C  | -3.47033000 | -0.49903000 | 0.61389700  |
| C  | -2.40654600 | 0.77097600  | -1.13369100 |
| C  | -4.71142300 | -0.30561500 | 0.00430100  |
| H  | -3.42620900 | -1.06896000 | 1.53891000  |
| C  | -3.64424500 | 0.96897900  | -1.74718400 |
| H  | -1.51697700 | 1.20763400  | -1.58091300 |
| C  | -4.80012100 | 0.42907400  | -1.17927800 |
| H  | -5.60776700 | -0.72448900 | 0.45390200  |
| H  | -3.70794300 | 1.54756400  | -2.66489200 |
| H  | -5.76507500 | 0.58331400  | -1.65448700 |
| C  | -0.79528200 | -0.56760300 | 2.70101100  |
| H  | -1.26369400 | 0.29490200  | 3.18704700  |
| H  | -1.41090600 | -1.44708500 | 2.91899400  |
| H  | 0.18297800  | -0.72116900 | 3.16753300  |
| C  | 0.40729700  | -1.64479500 | -0.04495500 |
| H  | -0.08970500 | -1.83045400 | -1.01370400 |
| C  | 1.84584900  | 4.67689400  | 0.34847900  |
| H  | 1.95246300  | 5.20195500  | -0.60875700 |
| H  | 0.92479600  | 5.03464800  | 0.81837200  |
| H  | 2.68322300  | 4.99513800  | 0.98161800  |
| C  | 0.58553800  | -2.99943700 | 0.67424900  |
| H  | 0.63615200  | -2.86276700 | 1.75992700  |
| H  | -0.30434900 | -3.61039500 | 0.47833700  |

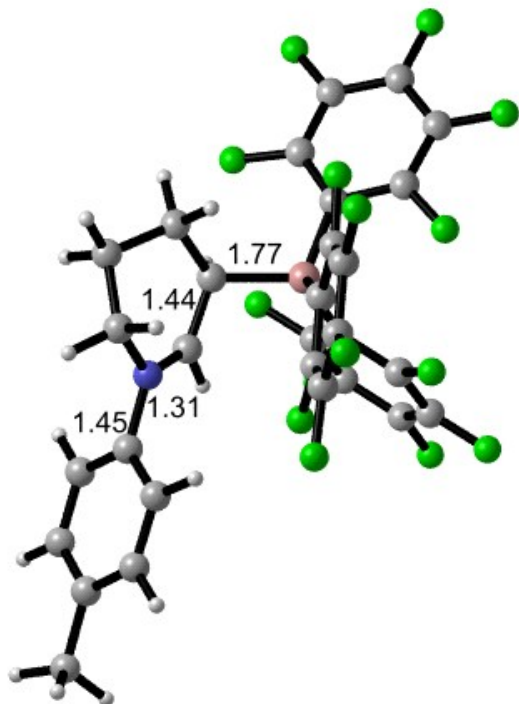

O

$G_{\text{gas}} = -2728.953862 \text{ a.u.}$

$E_{\text{gas}} = -2729.27732804 \text{ a.u.}$

|   |             |             |             |
|---|-------------|-------------|-------------|
| C | 3.88867400  | 0.07991600  | -1.34330600 |
| C | 4.47865400  | 1.05858100  | -2.14362100 |
| C | 5.75299600  | 1.52868400  | -1.82642100 |
| C | 6.45459200  | 1.02887500  | -0.72227400 |
| C | 5.83937500  | 0.04108900  | 0.06154300  |
| C | 4.56504200  | -0.43644900 | -0.23562100 |
| H | 3.94863600  | 1.44207200  | -3.01040200 |
| H | 6.20817300  | 2.29171400  | -2.45159300 |
| H | 6.36112500  | -0.35558200 | 0.92814800  |
| H | 4.09535200  | -1.17209700 | 0.40691600  |
| N | 2.57467300  | -0.41901900 | -1.68882500 |
| C | 1.50502800  | 0.32828700  | -1.54295800 |
| H | 1.69244900  | 1.32505500  | -1.15393200 |
| C | 0.15264400  | -0.07099400 | -1.82027500 |
| H | -0.31661500 | 0.77731600  | -2.31677400 |
| C | 0.00442900  | -1.37902400 | -2.62701700 |
| H | -0.76396300 | -1.22862000 | -3.38761200 |
| H | -0.35452300 | -2.18887500 | -1.98759900 |
| C | 1.31973100  | -1.81065700 | -3.28836100 |
| H | 1.56703100  | -1.14525300 | -4.12492100 |
| H | 1.23775500  | -2.82308500 | -3.69622800 |
| C | 2.47231600  | -1.77725800 | -2.28585600 |
| H | 2.32419600  | -2.50258700 | -1.47871200 |
| H | 3.43397100  | -1.98646500 | -2.75859800 |
| B | -0.76254900 | -0.05699500 | -0.30015500 |
| C | -0.59431400 | 1.38580400  | 0.50613000  |

|   |             |             |             |
|---|-------------|-------------|-------------|
| C | -0.54461700 | 1.50132700  | 1.90293300  |
| C | -0.64757800 | 2.62116600  | -0.15064200 |
| C | -0.51935800 | 2.71819300  | 2.58371600  |
| C | -0.62185400 | 3.86055300  | 0.48481600  |
| C | -0.55733600 | 3.91149500  | 1.87196400  |
| C | -0.16062500 | -1.35999000 | 0.51602300  |
| C | -0.73587800 | -2.63540800 | 0.52819600  |
| C | 1.07530000  | -1.30398600 | 1.16760900  |
| C | -0.16170500 | -3.74895200 | 1.14386500  |
| C | 1.69756000  | -2.38678400 | 1.77913100  |
| C | 1.07140500  | -3.62879600 | 1.77389300  |
| C | -2.38248900 | -0.14367600 | -0.63066700 |
| C | -3.03136500 | 0.16739300  | -1.82865600 |
| C | -3.26336300 | -0.42333500 | 0.42421500  |
| C | -4.41805400 | 0.17314200  | -1.98959500 |
| C | -4.64941000 | -0.42969000 | 0.31390100  |
| C | -5.23770700 | -0.12710500 | -0.91047200 |
| F | -0.73037600 | 2.67756100  | -1.50734600 |
| F | -0.66237700 | 4.99532100  | -0.22933400 |
| F | -0.53071600 | 5.08734000  | 2.50960900  |
| F | -0.45891500 | 2.74519900  | 3.92224900  |
| F | -0.51275400 | 0.41041000  | 2.69129900  |
| F | 1.76897600  | -0.13700400 | 1.20651900  |
| F | 2.91291300  | -2.24664400 | 2.34311500  |
| F | 1.65225200  | -4.68716700 | 2.35018200  |
| F | -0.77669000 | -4.93888800 | 1.10676800  |
| F | -1.89779500 | -2.87646100 | -0.11542100 |
| F | -2.33989300 | 0.48747500  | -2.95415200 |
| F | -2.76926800 | -0.71233200 | 1.64610300  |
| F | -5.41976300 | -0.71853700 | 1.37204200  |
| F | -6.56912400 | -0.12432500 | -1.04380500 |
| F | -4.95990000 | 0.47264900  | -3.17979700 |
| C | 7.82365700  | 1.55501700  | -0.36474700 |
| H | 7.76013500  | 2.29007400  | 0.44666900  |
| H | 8.48314900  | 0.75181500  | -0.02240500 |
| H | 8.29954600  | 2.04675200  | -1.21733700 |

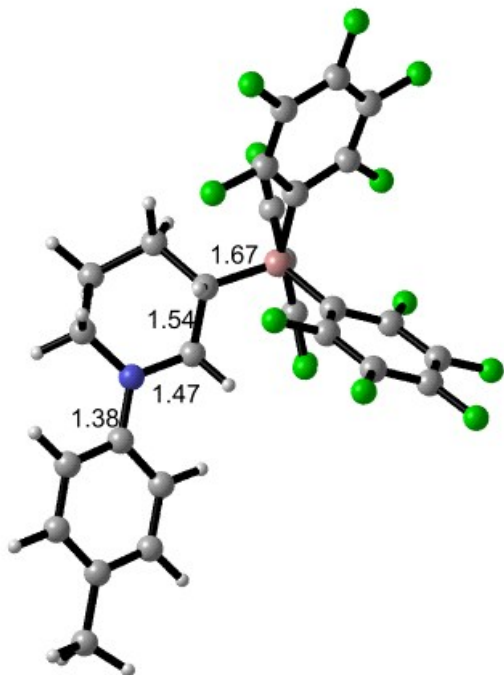

**P**

$G_{\text{gas}} = -2729.642861 \text{ a.u.}$

$E_{\text{gas}} = -2729.97556363 \text{ a.u.}$

|   |             |             |             |
|---|-------------|-------------|-------------|
| C | -4.34517200 | 0.00067900  | -1.26948700 |
| C | -4.72272500 | -0.27934500 | 0.06875700  |
| C | -6.02260300 | -0.05722400 | 0.50989300  |
| C | -7.02479400 | 0.44225300  | -0.33296400 |
| C | -6.65193400 | 0.72448300  | -1.65194500 |
| C | -5.35549200 | 0.51957700  | -2.11661300 |
| H | -3.99680400 | -0.69124500 | 0.75965400  |
| H | -6.26481200 | -0.29008100 | 1.54569600  |
| H | -7.39204200 | 1.13320900  | -2.33858900 |
| H | -5.11608600 | 0.80032600  | -3.13601500 |
| N | -3.05808900 | -0.21645900 | -1.71430500 |
| C | -0.59658200 | -0.06177000 | -1.36454500 |
| H | -0.73288700 | 0.96645200  | -1.69716700 |
| C | -0.31716800 | -0.89853700 | -2.64017200 |
| H | 0.22903900  | -1.81841900 | -2.40836000 |
| H | 0.33165900  | -0.31652900 | -3.30094200 |
| C | -1.61572500 | -1.27601900 | -3.38882600 |
| H | -1.97094200 | -2.26076800 | -3.05908200 |
| H | -1.43823200 | -1.35557800 | -4.46888200 |
| C | -2.74525000 | -0.27189300 | -3.13822100 |
| H | -2.46662600 | 0.71862100  | -3.53738100 |
| H | -3.64032500 | -0.59334200 | -3.68191900 |
| B | 0.65218600  | -0.06252800 | -0.25084900 |
| C | 2.07637900  | 0.58628700  | -0.85939100 |
| C | 3.29564300  | 0.38117700  | -0.19751300 |
| C | 2.18100700  | 1.47480200  | -1.93479300 |

|   |             |             |             |
|---|-------------|-------------|-------------|
| C | 4.50734400  | 0.95630900  | -0.56789000 |
| C | 3.37326200  | 2.07702400  | -2.34461400 |
| C | 4.54980300  | 1.81814900  | -1.65771400 |
| C | 0.83258300  | -1.65347500 | 0.21680100  |
| C | 0.00748100  | -2.26026400 | 1.17044200  |
| C | 1.71720300  | -2.54855600 | -0.39222700 |
| C | 0.06391800  | -3.60584700 | 1.52451100  |
| C | 1.81359400  | -3.90322900 | -0.07455400 |
| C | 0.98114900  | -4.44054300 | 0.89764700  |
| C | 0.36394900  | 0.96778800  | 1.04828300  |
| C | -0.18238900 | 2.24621000  | 0.86750600  |
| C | 0.75853800  | 0.72519200  | 2.37210900  |
| C | -0.37325300 | 3.17934400  | 1.88626100  |
| C | 0.58592900  | 1.62597400  | 3.42288900  |
| C | 0.01101200  | 2.86655500  | 3.18279900  |
| F | 1.10703200  | 1.82141800  | -2.68379800 |
| F | 3.38843300  | 2.91326600  | -3.40101000 |
| F | 5.70741100  | 2.38995600  | -2.03571000 |
| F | 5.63580700  | 0.69423400  | 0.11912900  |
| F | 3.35205300  | -0.42422200 | 0.88566100  |
| F | 2.55113700  | -2.13725000 | -1.37765000 |
| F | 2.69845100  | -4.69705600 | -0.70896700 |
| F | 1.05195800  | -5.74551900 | 1.21810100  |
| F | -0.76285000 | -4.10810800 | 2.46177800  |
| F | -0.93359000 | -1.53711900 | 1.82531600  |
| F | -0.54967100 | 2.68081300  | -0.36088500 |
| F | 1.35600500  | -0.43140600 | 2.72776400  |
| F | 0.98024200  | 1.30688200  | 4.67057200  |
| F | -0.16064600 | 3.74962900  | 4.18259000  |
| F | -0.91398800 | 4.38389500  | 1.62190900  |
| C | -8.44126300 | 0.64270000  | 0.15334700  |
| H | -9.02231400 | -0.29041800 | 0.13666100  |
| H | -8.46580600 | 1.01328100  | 1.18464300  |
| H | -8.97846300 | 1.36562900  | -0.47036200 |
| C | -1.95653000 | -0.46229300 | -0.76604400 |
| H | -1.95935300 | -1.51579100 | -0.44847600 |
| H | -2.14784200 | 0.13475200  | 0.12932100  |

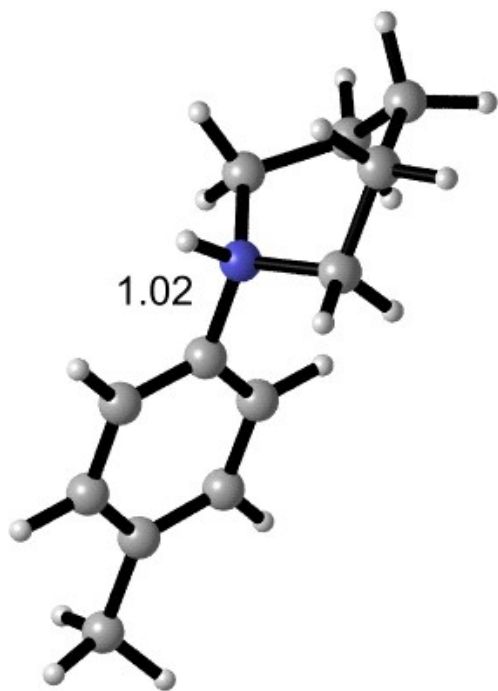

**Q**

$G_{\text{gas}} = -522.424491 \text{ a.u.}$

$E_{\text{gas}} = -522.666080632 \text{ a.u.}$

|   |             |             |             |
|---|-------------|-------------|-------------|
| C | -0.44191800 | -0.30052000 | 0.18244200  |
| C | -0.88127300 | 0.91668000  | -0.33718700 |
| C | -2.25034700 | 1.12822900  | -0.47890500 |
| C | -3.18721500 | 0.14748500  | -0.11282600 |
| C | -2.70809900 | -1.06454700 | 0.40179300  |
| C | -1.34055900 | -1.29551700 | 0.55321000  |
| H | -0.18190400 | 1.69391600  | -0.62896900 |
| H | -2.59709300 | 2.07411600  | -0.88414500 |
| H | -3.40956700 | -1.84127700 | 0.69003000  |
| H | -0.99342700 | -2.24466800 | 0.95631300  |
| C | 1.71877600  | -0.75217700 | -1.01036400 |
| H | 1.45005800  | 0.10882000  | -1.62364700 |
| H | 1.27492000  | -1.64215600 | -1.46076800 |
| C | 3.22285000  | -0.86923900 | -0.79790000 |
| H | 3.68106500  | -1.11539300 | -1.75996100 |
| H | 3.42639100  | -1.72722600 | -0.14442300 |
| C | 3.82453700  | 0.43221000  | -0.20793300 |
| H | 4.28624900  | 1.02915100  | -0.99897200 |
| H | 4.62346000  | 0.17643400  | 0.49412700  |
| C | 2.75318700  | 1.28503400  | 0.50226800  |
| H | 2.22302300  | 1.92198700  | -0.21431900 |
| H | 3.21549900  | 1.96806100  | 1.22148400  |
| C | 1.75203200  | 0.42853000  | 1.26765500  |
| H | 2.25735100  | -0.18222100 | 2.02013700  |
| H | 0.97875100  | 1.01716300  | 1.75998600  |
| C | -4.66616300 | 0.40577800  | -0.25121000 |
| H | -5.23711300 | -0.52550000 | -0.26058200 |

|   |             |             |             |
|---|-------------|-------------|-------------|
| H | -5.03207600 | 1.01026800  | 0.58712600  |
| H | -4.89009600 | 0.95532500  | -1.16977200 |
| N | 1.01091600  | -0.56747200 | 0.33571900  |
| H | 1.07325900  | -1.47618300 | 0.80006100  |

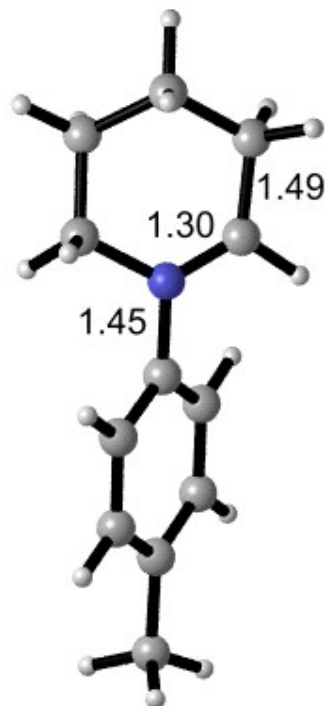

**R**

$G_{\text{gas}} = -521.244632 \text{ a.u.}$

$E_{\text{gas}} = -521.461983475 \text{ a.u.}$

|   |             |             |             |
|---|-------------|-------------|-------------|
| C | 0.41410400  | -0.01493800 | -0.04871500 |
| C | 1.09498900  | -1.10816800 | 0.49292300  |
| C | 2.48753200  | -1.09974800 | 0.50969800  |
| C | 3.21661400  | -0.01468200 | 0.00139600  |
| C | 2.50227500  | 1.07223200  | -0.52940700 |
| C | 1.11124000  | 1.08669100  | -0.55349800 |
| H | 0.54972900  | -1.94032000 | 0.92831300  |
| H | 3.01470300  | -1.94669700 | 0.93814700  |
| H | 3.04403800  | 1.91990400  | -0.93806800 |
| H | 0.58676900  | 1.93064800  | -0.98883800 |
| N | -1.03543700 | -0.02241700 | -0.08348100 |
| C | -1.68710300 | -1.06104600 | -0.50218900 |
| H | -1.07918600 | -1.88984300 | -0.85858800 |
| C | -3.16837500 | -1.19288500 | -0.51382100 |
| H | -3.40751700 | -1.98035100 | 0.21962200  |
| H | -3.45353000 | -1.62405500 | -1.48196900 |
| C | -3.91703600 | 0.11059200  | -0.20872600 |
| H | -4.93506100 | -0.11637700 | 0.11578700  |
| H | -4.00107600 | 0.70889400  | -1.12285600 |
| C | -3.16504200 | 0.90192700  | 0.86510800  |
| H | -3.13877000 | 0.34021200  | 1.80634500  |

|   |             |             |             |
|---|-------------|-------------|-------------|
| H | -3.66364900 | 1.85214200  | 1.07575500  |
| C | -1.73980500 | 1.20673900  | 0.41393700  |
| H | -1.72646000 | 1.93145300  | -0.40645700 |
| H | -1.12503200 | 1.60026300  | 1.22449800  |
| C | 4.72262800  | 0.00192900  | 0.05022900  |
| H | 5.14440900  | 0.49736400  | -0.82848000 |
| H | 5.07285200  | 0.55059600  | 0.93280200  |
| H | 5.13370800  | -1.00878000 | 0.10674200  |

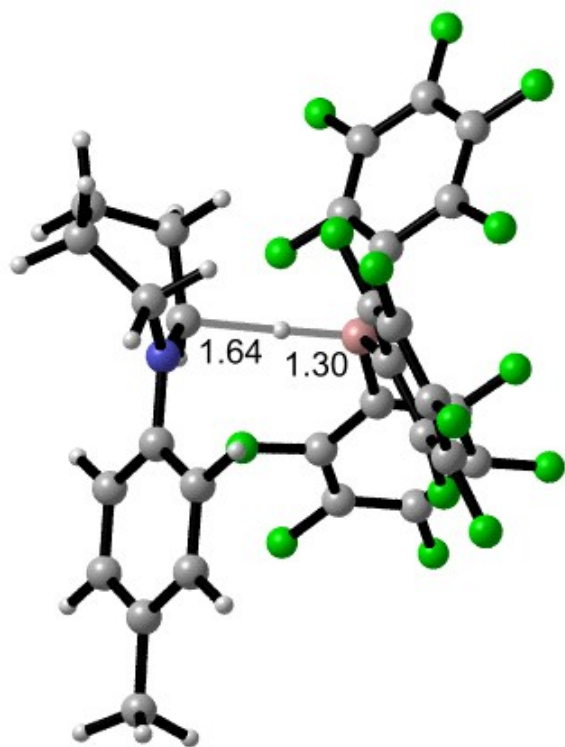

**TS<sub>1</sub>**

**G<sub>gas</sub> = -2730.124794 a.u.**

**E<sub>gas</sub> = -2730.46591480 a.u.**

|   |             |             |             |
|---|-------------|-------------|-------------|
| C | 3.04565700  | -0.63324500 | -1.59981700 |
| C | 3.49105300  | 0.37849400  | -2.45469200 |
| C | 4.60501100  | 1.13791300  | -2.10535600 |
| C | 5.30093200  | 0.90536800  | -0.91146800 |
| C | 4.84355800  | -0.12076000 | -0.07317800 |
| C | 3.72606400  | -0.88333100 | -0.40424400 |
| H | 2.98188000  | 0.56136700  | -3.39553800 |
| H | 4.94402900  | 1.91953900  | -2.77953300 |
| H | 5.36040600  | -0.31959400 | 0.86159800  |
| H | 3.36952500  | -1.65017300 | 0.27574700  |
| N | 1.89629500  | -1.42134900 | -1.94701800 |
| C | 0.74159500  | -0.86485500 | -2.31764400 |
| H | 0.77699300  | 0.17675300  | -2.60694600 |
| C | -0.29009600 | -1.78607100 | -2.91305800 |
| H | -1.06272800 | -1.18998500 | -3.39747500 |

|   |             |             |             |
|---|-------------|-------------|-------------|
| H | -0.77352200 | -2.35797800 | -2.11536200 |
| C | 0.40692400  | -2.74833900 | -3.90184300 |
| H | 0.78632700  | -2.16859000 | -4.74974900 |
| H | -0.33669700 | -3.44044900 | -4.30648600 |
| C | 1.56756700  | -3.51841700 | -3.22529700 |
| H | 2.44378800  | -3.52799300 | -3.88035900 |
| H | 1.29329300  | -4.56281800 | -3.04551300 |
| C | 1.94907500  | -2.89859500 | -1.86391600 |
| H | 1.25779200  | -3.23332100 | -1.08794900 |
| H | 2.95911500  | -3.18158600 | -1.56996200 |
| B | -0.63557300 | 0.08593600  | 0.10189500  |
| C | -0.58145500 | 1.71367000  | 0.16834200  |
| C | -1.31920600 | 2.37680500  | 1.15452400  |
| C | 0.09982900  | 2.55535300  | -0.70491400 |
| C | -1.38795300 | 3.76085800  | 1.27275200  |
| C | 0.06190800  | 3.94716500  | -0.63134700 |
| C | -0.69052900 | 4.55589400  | 0.36595700  |
| C | 0.21179500  | -0.70909700 | 1.23889000  |
| C | 0.25470900  | -2.10584700 | 1.23528800  |
| C | 0.99715500  | -0.12192200 | 2.23811700  |
| C | 1.00040500  | -2.88024500 | 2.11594100  |
| C | 1.75477200  | -0.85502900 | 3.15370300  |
| C | 1.75945700  | -2.24441700 | 3.09523900  |
| C | -2.17718400 | -0.38810900 | -0.12791600 |
| C | -2.82628200 | -0.06434700 | -1.32170800 |
| C | -2.97863000 | -1.04814600 | 0.80748000  |
| C | -4.15080800 | -0.38256500 | -1.60428400 |
| C | -4.31178100 | -1.38304800 | 0.57311900  |
| C | -4.90341700 | -1.04844700 | -0.64120600 |
| F | 0.86965600  | 2.04725300  | -1.70555300 |
| F | 0.74392300  | 4.69770600  | -1.51096400 |
| F | -0.74108100 | 5.89051000  | 0.45722200  |
| F | -2.11091900 | 4.33511300  | 2.24431000  |
| F | -1.99715000 | 1.65324300  | 2.06929300  |
| F | 1.07686100  | 1.21495000  | 2.36837800  |
| F | 2.48486000  | -0.22875400 | 4.08704200  |
| F | 2.48521300  | -2.96014200 | 3.96185200  |
| F | 0.99908300  | -4.21950000 | 2.02513100  |
| F | -0.44514700 | -2.79773500 | 0.29500500  |
| F | -2.14237900 | 0.58691200  | -2.29916100 |
| F | -2.48503000 | -1.39300500 | 2.01168100  |
| F | -5.03064400 | -2.01987500 | 1.50814100  |
| F | -6.18071900 | -1.36662200 | -0.88263100 |
| F | -4.70283500 | -0.05634000 | -2.78316300 |
| H | -0.03656300 | -0.29381400 | -0.99125500 |
| C | 6.48915600  | 1.75237900  | -0.52576600 |
| H | 7.20883700  | 1.18521700  | 0.07152700  |

|   |            |            |             |
|---|------------|------------|-------------|
| H | 7.00750300 | 2.14050400 | -1.40718900 |
| H | 6.17488400 | 2.61486100 | 0.07466000  |

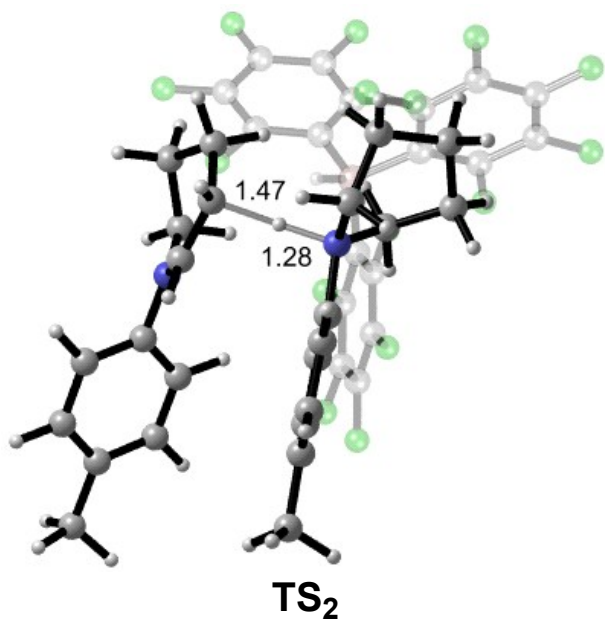

**G<sub>gas</sub> = -3252.152875 a.u.**

**E<sub>gas</sub> = -3252.74030795 a.u.**

|   |             |             |             |
|---|-------------|-------------|-------------|
| C | -3.71897900 | -2.05819200 | -1.42857000 |
| C | -3.36926100 | -2.54590400 | -0.16569200 |
| C | -4.16494700 | -3.51216300 | 0.44463100  |
| C | -5.31755600 | -4.01025400 | -0.18087300 |
| C | -5.65436300 | -3.50127000 | -1.44181000 |
| C | -4.86253200 | -2.53962400 | -2.06995500 |
| H | -2.50535600 | -2.14524200 | 0.34981900  |
| H | -3.88699800 | -3.87217700 | 1.43164100  |
| H | -6.54173300 | -3.87103500 | -1.94880100 |
| H | -5.12137600 | -2.17490800 | -3.05968600 |
| N | -2.89933800 | -1.06115300 | -2.05560400 |
| C | -2.63198900 | 1.20440400  | -2.87303200 |
| H | -2.56486100 | 2.04340700  | -1.66519000 |
| H | -3.22752100 | 1.91485400  | -3.45136400 |
| C | -1.21168400 | 0.91919000  | -3.38846600 |
| H | -0.44519000 | 1.33907900  | -2.72829700 |
| H | -1.07511700 | 1.40347300  | -4.36138800 |
| C | -0.97275800 | -0.59233600 | -3.52223600 |
| H | 0.08911600  | -0.81205400 | -3.64692100 |
| H | -1.50475300 | -0.98079900 | -4.39937400 |
| C | -1.45813300 | -1.33285000 | -2.27524800 |
| H | -1.33973100 | -2.41246500 | -2.38017100 |
| H | -0.88946300 | -1.01104200 | -1.39883700 |
| C | -3.39714000 | 0.12662200  | -2.40101300 |
| H | -4.46329000 | 0.24641500  | -2.22673300 |
| C | -3.77724700 | 2.46305700  | 0.06788000  |

|   |             |             |             |
|---|-------------|-------------|-------------|
| C | -5.00758900 | 3.12617200  | -0.00280500 |
| C | -6.11353600 | 2.63158800  | 0.69249200  |
| C | -6.03803800 | 1.46792200  | 1.46299600  |
| C | -4.80765400 | 0.79777200  | 1.49881700  |
| C | -3.69605200 | 1.27433700  | 0.81008700  |
| H | -5.13211500 | 4.02738100  | -0.58887600 |
| H | -7.05412400 | 3.17225600  | 0.62881100  |
| H | -4.70699600 | -0.12261000 | 2.06737600  |
| H | -2.77623000 | 0.70599000  | 0.86413400  |
| N | -2.61342100 | 2.89791000  | -0.70773300 |
| C | -2.79348100 | 4.20781500  | -1.42218600 |
| H | -3.28256700 | 4.91819600  | -0.74902300 |
| H | -3.46488600 | 4.02644200  | -2.26670700 |
| C | -1.45081500 | 4.78106600  | -1.86847200 |
| H | -1.64002200 | 5.63963600  | -2.52032700 |
| H | -0.91541200 | 4.04398000  | -2.47731300 |
| C | -0.60787900 | 5.18975800  | -0.64218300 |
| H | -0.85239500 | 6.21545200  | -0.34534400 |
| H | 0.45104000  | 5.17744600  | -0.90686100 |
| C | -0.87544100 | 4.22881400  | 0.53976100  |
| H | -1.66131400 | 4.61963100  | 1.19750800  |
| H | 0.01855900  | 4.11588800  | 1.15982600  |
| C | -1.28661000 | 2.84680100  | 0.03715200  |
| H | -0.53827200 | 2.45187200  | -0.65192800 |
| H | -1.37963400 | 2.13519500  | 0.85167100  |
| B | 2.03295900  | -0.26658600 | 0.04524600  |
| C | 3.14647900  | -1.14773200 | -0.78200300 |
| C | 4.52973200  | -1.10899600 | -0.58555000 |
| C | 2.74072200  | -2.02054800 | -1.79372200 |
| C | 5.44165800  | -1.84738500 | -1.33877100 |
| C | 3.61041500  | -2.78027700 | -2.57236700 |
| C | 4.97874400  | -2.69176100 | -2.34245900 |
| C | 1.40615300  | -1.10629000 | 1.31696700  |
| C | 0.04172800  | -1.06968100 | 1.59128600  |
| C | 2.12529000  | -1.94888000 | 2.17228000  |
| C | -0.59074000 | -1.79639600 | 2.59442600  |
| C | 1.54366100  | -2.69354500 | 3.19907900  |
| C | 0.16957300  | -2.62280800 | 3.41210700  |
| C | 2.57991000  | 1.22913800  | 0.45706700  |
| C | 2.40560900  | 2.31056800  | -0.40957200 |
| C | 3.25617400  | 1.55149800  | 1.63788000  |
| C | 2.87701900  | 3.59756400  | -0.15763600 |
| C | 3.72880800  | 2.82736400  | 1.94303200  |
| C | 3.54038700  | 3.86380300  | 1.03432700  |
| F | 1.41972600  | -2.17517000 | -2.08055800 |
| F | 3.14259800  | -3.59395400 | -3.53646700 |
| F | 5.83931500  | -3.41282200 | -3.07662400 |

|   |             |             |             |   |            |             |             |
|---|-------------|-------------|-------------|---|------------|-------------|-------------|
| F | 6.76060100  | -1.75819800 | -1.10176900 | C | 6.02954800 | -0.19021500 | -0.20802900 |
| F | 5.06281300  | -0.32935000 | 0.37667000  | C | 4.90194300 | 0.15211700  | -0.95078300 |
| F | 3.45465500  | -2.08573000 | 2.03124500  | H | 4.99822200 | 3.52888600  | -0.52117000 |
| F | 2.29179800  | -3.48459200 | 3.98248600  | H | 7.01766700 | 2.90537700  | 0.76165800  |
| F | -0.41093200 | -3.34001500 | 4.38539400  | H | 6.30702100 | -1.23844900 | -0.14131300 |
| F | -1.93392400 | -1.72941800 | 2.75077100  | H | 4.32952100 | -0.61567200 | -1.45640000 |
| F | -0.79622800 | -0.29859400 | 0.82444000  | N | 3.37540700 | 1.85434200  | -1.83992400 |
| F | 1.73007700  | 2.16235600  | -1.58274900 | C | 1.02648400 | 1.60227200  | -2.37664200 |
| F | 3.49500000  | 0.60548500  | 2.56510000  | H | 0.32490500 | 2.55449700  | -1.50712600 |
| F | 4.36730000  | 3.06704500  | 3.09916200  | H | 0.26678500 | 0.82198200  | -2.30934900 |
| F | 3.99081700  | 5.09863200  | 1.30140300  | C | 1.19572500 | 2.29381800  | -3.73914100 |
| F | 2.67755800  | 4.59406800  | -1.04865900 | H | 0.75874500 | 3.30031300  | -3.73916300 |
| H | 1.11629500  | -0.08421500 | -0.71839000 | H | 0.64950700 | 1.72998000  | -4.50272400 |
| C | -6.15386700 | -5.08190400 | 0.47668400  | C | 2.67592600 | 2.39891300  | -4.13222000 |
| H | -6.19316500 | -4.94867100 | 1.56208200  | H | 2.81522900 | 3.11295300  | -4.95013300 |
| H | -7.17909800 | -5.08164800 | 0.09581800  | H | 3.04388600 | 1.42694800  | -4.47962500 |
| H | -5.73465700 | -6.07799100 | 0.28887300  | C | 3.52220500 | 2.83410000  | -2.93154500 |
| C | -7.22760200 | 0.95383200  | 2.23644700  | H | 4.58195600 | 2.89038600  | -3.18639800 |
| H | -8.15843400 | 1.41348300  | 1.89325700  | H | 3.20398200 | 3.82451000  | -2.57703000 |
| H | -7.32749100 | -0.13179100 | 2.13835500  | C | 2.17794600 | 1.28837700  | -1.64267200 |
| H | -7.12586500 | 1.17278700  | 3.30619000  | H | 2.11667800 | 0.57541700  | -0.82642700 |

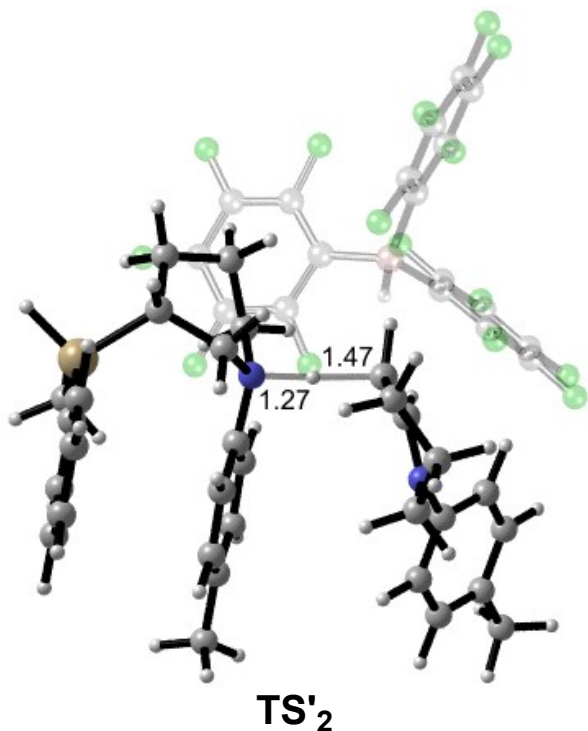

$G_{\text{gas}} = -3813.122744 \text{ a.u.}$

$E_{\text{gas}} = -3813.82560902 \text{ a.u.}$

|   |            |            |             |   |             |             |             |
|---|------------|------------|-------------|---|-------------|-------------|-------------|
| C | 4.52568100 | 1.49376100 | -1.06060000 | C | -1.25348600 | 4.02935400  | -1.88881500 |
| C | 5.29332800 | 2.48673600 | -0.44504600 | H | -1.62072600 | 3.21813400  | -2.52153100 |
| C | 6.42610800 | 2.12801700 | 0.28485400  | H | -0.61098000 | 4.64531000  | -2.51854800 |
| C | 6.81111800 | 0.78726900 | 0.42303900  | B | 0.15044800  | -2.07923900 | -0.05471400 |



|    |             |             |             |
|----|-------------|-------------|-------------|
| C  | -0.42857700 | -1.57563900 | 1.40101000  |
| C  | -1.40561200 | -2.23303800 | 2.15561500  |
| C  | -0.01186900 | -0.36303300 | 1.94601700  |
| C  | -1.94114900 | -1.72564500 | 3.33992200  |
| C  | -0.53490600 | 0.19984600  | 3.10589900  |
| C  | -1.50900100 | -0.49145900 | 3.81576700  |
| C  | 1.47397900  | -3.03488600 | 0.10309500  |
| C  | 2.58800100  | -2.83721700 | -0.71276400 |
| C  | 1.65317500  | -4.01727500 | 1.08131600  |
| C  | 3.80054500  | -3.50407400 | -0.55799300 |
| C  | 2.84027500  | -4.72528500 | 1.26412200  |
| C  | 3.93105200  | -4.45988000 | 0.44184600  |
| C  | -1.05680700 | -2.67413100 | -0.99009500 |
| C  | -1.92792700 | -1.79356800 | -1.63262900 |
| C  | -1.33498100 | -4.02271800 | -1.22389400 |
| C  | -2.98500900 | -2.18778300 | -2.44563400 |
| C  | -2.37582900 | -4.46861600 | -2.03910700 |
| C  | -3.21471500 | -3.54339200 | -2.65226800 |
| F  | 0.94324900  | 0.38481900  | 1.31506100  |
| F  | -0.14833500 | 1.43023500  | 3.51414500  |
| F  | -2.04235300 | 0.03973100  | 4.92710600  |
| F  | -2.88304900 | -2.40128000 | 4.01528700  |
| F  | -1.89937300 | -3.41486100 | 1.74661000  |
| F  | 0.65112400  | -4.32274600 | 1.92731800  |
| F  | 2.94818000  | -5.65110300 | 2.23048000  |
| F  | 5.09082800  | -5.11242800 | 0.61251800  |
| F  | 4.85813800  | -3.20328100 | -1.34395600 |
| F  | 2.54963000  | -1.92367700 | -1.72164700 |
| F  | -1.78126700 | -0.44237200 | -1.48149600 |
| F  | -0.58503700 | -4.98337600 | -0.65022700 |
| F  | -2.58662500 | -5.78061200 | -2.22852100 |
| F  | -4.22852900 | -3.95045500 | -3.43048300 |
| F  | -3.79639200 | -1.27083300 | -3.01668700 |
| H  | 0.53117000  | -1.08161100 | -0.61881700 |
| Si | -3.76787600 | 1.47571600  | 1.02647600  |
| H  | -3.16641000 | 0.12004900  | 1.04975600  |
| C  | -3.72071400 | 2.22463500  | 2.76013600  |
| H  | -4.28009400 | 1.59653500  | 3.46110900  |
| H  | -2.69558700 | 2.28436200  | 3.13965200  |
| H  | -4.15182600 | 3.23070500  | 2.79410600  |
| C  | -5.52288500 | 1.36621700  | 0.35033900  |
| C  | -5.77939200 | 0.63701400  | -0.82795600 |
| C  | -6.60883800 | 2.00229000  | 0.97833600  |
| C  | -7.06792400 | 0.55208200  | -1.35620600 |
| H  | -4.97218600 | 0.12136800  | -1.34283500 |
| C  | -7.90014900 | 1.91931900  | 0.45259900  |
| H  | -6.45164300 | 2.56571100  | 1.89490600  |

|   |             |             |             |
|---|-------------|-------------|-------------|
| C | -8.13113500 | 1.19386900  | -0.71679700 |
| H | -7.24218700 | -0.02053100 | -2.26291600 |
| H | -8.72404000 | 2.41627700  | 0.95765800  |
| H | -9.13531700 | 1.12442600  | -1.12592600 |
| C | 3.55852700  | 6.57434800  | 1.92576000  |
| H | 3.92712800  | 7.40126600  | 1.31197700  |
| H | 3.13197100  | 7.00910400  | 2.83804500  |
| H | 4.41616900  | 5.96654200  | 2.22966800  |
| C | 8.02081400  | 0.40240100  | 1.24070100  |
| H | 8.57158100  | -0.42038800 | 0.77474500  |
| H | 8.70745000  | 1.24472000  | 1.36407500  |
| H | 7.72769900  | 0.06679600  | 2.24305600  |

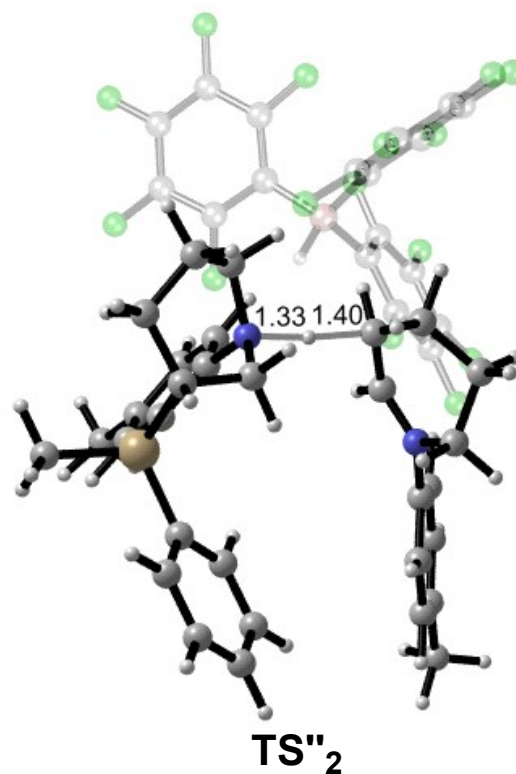

**G<sub>gas</sub> = -3811.944592 a.u.**

**E<sub>gas</sub> = -3812.62797471 a.u.**

|   |            |             |             |
|---|------------|-------------|-------------|
| C | 2.73671800 | 3.35942000  | 0.61216800  |
| C | 4.03656800 | 3.81953500  | 0.38103600  |
| C | 4.24915300 | 4.86644400  | -0.51638800 |
| C | 3.18624400 | 5.46815600  | -1.20197000 |
| C | 1.89176000 | 4.98901900  | -0.95428900 |
| C | 1.65852400 | 3.95571300  | -0.05140000 |
| H | 4.88125600 | 3.35292900  | 0.87843400  |
| H | 5.26356400 | 5.21605400  | -0.69014600 |
| H | 1.03908700 | 5.43634100  | -1.45755800 |
| H | 0.64244400 | 3.63147000  | 0.13899500  |
| N | 2.50993200 | 2.28774600  | 1.53952200  |
| C | 1.35863100 | 0.23697900  | 2.14126900  |
| H | 0.36209800 | -0.16959700 | 1.98019100  |

|   |             |             |             |    |             |             |             |
|---|-------------|-------------|-------------|----|-------------|-------------|-------------|
| C | 1.83370600  | 0.31791000  | 3.59881900  | C  | 3.47801600  | -1.96488100 | -1.35494700 |
| H | 2.65389500  | -0.38543300 | 3.79194300  | C  | 3.22144000  | -1.75117900 | -2.72347800 |
| H | 1.01737200  | 0.01346000  | 4.26077000  | C  | 1.96390200  | -1.40000100 | -3.22281300 |
| C | 2.30401200  | 1.73794000  | 3.93938100  | C  | 0.91189600  | -1.26746000 | -2.30562900 |
| H | 2.84604200  | 1.75838300  | 4.89001900  | C  | 1.12427300  | -1.45776400 | -0.94367700 |
| H | 1.44045800  | 2.40499300  | 4.04134400  | H  | 4.03607400  | -1.88063600 | -3.43392700 |
| C | 3.21655500  | 2.28844800  | 2.83793600  | H  | -0.08899400 | -1.01899300 | -2.64607300 |
| H | 3.51583100  | 3.31711200  | 3.04710700  | H  | 0.28359100  | -1.35404400 | -0.26531300 |
| H | 4.12898800  | 1.68250900  | 2.75625100  | N  | 2.51869600  | -1.94920300 | 0.99096800  |
| C | 1.61710500  | 1.32461600  | 1.29312000  | C  | 3.88197800  | -4.42225400 | 1.06455100  |
| H | 1.10201500  | 1.39269300  | 0.34131700  | H  | 4.51132200  | -5.25865900 | 1.38287100  |
| B | -2.95847000 | -0.19737400 | -0.10033300 | H  | 3.49307000  | -4.69547500 | 0.07517800  |
| C | -3.77175400 | -1.26754700 | -1.03417400 | C  | 2.68663000  | -4.26330800 | 2.01792200  |
| C | -4.84011900 | -2.07354800 | -0.63719200 | H  | 3.04455600  | -4.07863600 | 3.03751700  |
| C | -3.38193000 | -1.44800600 | -2.36305400 | H  | 2.10182100  | -5.18787900 | 2.06312200  |
| C | -5.45716100 | -3.00588100 | -1.47140500 | C  | 1.75240300  | -3.12854800 | 1.56295600  |
| C | -3.96522700 | -2.36278200 | -3.23503600 | H  | 1.07674900  | -3.47499700 | 0.78093600  |
| C | -5.01756300 | -3.15220000 | -2.78257200 | H  | 1.13179800  | -2.76216500 | 2.38609400  |
| C | -3.30666400 | 1.36515000  | -0.47696900 | C  | 4.73072400  | -3.11491000 | 0.98939900  |
| C | -2.32819900 | 2.35174400  | -0.36825400 | H  | 5.62668200  | -3.20957500 | 1.61357900  |
| C | -4.53538200 | 1.83172200  | -0.95176000 | Si | 5.16669400  | -2.58859900 | -0.78646600 |
| C | -2.51160500 | 3.68450700  | -0.72297500 | C  | 6.42586100  | -1.17896100 | -0.74800600 |
| C | -4.77068100 | 3.15688000  | -1.31949800 | C  | 6.05895900  | 0.15328100  | -1.01635000 |
| C | -3.74861000 | 4.09441000  | -1.20673500 | C  | 7.77350100  | -1.43084400 | -0.42325100 |
| C | -3.08242600 | -0.45611300 | 1.51845500  | C  | 6.99437400  | 1.18946000  | -0.96052500 |
| C | -2.10910500 | -1.17139000 | 2.20974600  | H  | 5.03108700  | 0.38471600  | -1.28305400 |
| C | -4.08085300 | 0.07388700  | 2.34172300  | C  | 8.71199100  | -0.40015600 | -0.36431300 |
| C | -2.05517000 | -1.30416200 | 3.59410300  | H  | 8.10258300  | -2.44707300 | -0.21476900 |
| C | -4.09076300 | -0.05128100 | 3.73044300  | C  | 8.32277900  | 0.91432300  | -0.63310900 |
| C | -3.06158200 | -0.74048700 | 4.36786900  | H  | 6.68406300  | 2.20749800  | -1.18004800 |
| F | -2.36831100 | -0.70284100 | -2.87863600 | H  | 9.74558400  | -0.62122800 | -0.11288200 |
| F | -3.52755700 | -2.48914400 | -4.50113900 | H  | 9.05325000  | 1.71747100  | -0.59196700 |
| F | -5.59960900 | -4.04285100 | -3.60083400 | C  | 5.78924900  | -4.00403400 | -1.86686900 |
| F | -6.47556700 | -3.75979400 | -1.02418800 | H  | 5.91439400  | -3.67929500 | -2.90479100 |
| F | -5.33891400 | -1.98794100 | 0.61467700  | H  | 6.76296400  | -4.36551100 | -1.51873600 |
| F | -5.57900500 | 0.99131800  | -1.07880300 | H  | 5.09536700  | -4.85018200 | -1.86322800 |
| F | -5.97300900 | 3.54134600  | -1.77601500 | C  | 3.90760400  | -1.92639600 | 1.52421600  |
| F | -3.95268300 | 5.37426700  | -1.55363300 | H  | 4.35398600  | -0.96147500 | 1.26088700  |
| F | -1.50689400 | 4.58285500  | -0.59896400 | H  | 3.81795500  | -1.94863700 | 2.61424500  |
| F | -1.09085800 | 2.03635800  | 0.11616800  | H  | 1.97855800  | -0.84697600 | 1.50055100  |
| F | -1.08115500 | -1.77371000 | 1.53779000  | C  | 1.73540200  | -1.17224200 | -4.69739900 |
| F | -5.10540600 | 0.75973900  | 1.80205100  | H  | 1.55076700  | -0.11227200 | -4.90807000 |
| F | -5.07490400 | 0.49104900  | 4.46451000  | H  | 2.59912200  | -1.48425800 | -5.29111800 |
| F | -3.03912300 | -0.85273900 | 5.70480500  | H  | 0.85928000  | -1.72437100 | -5.05233700 |
| F | -1.01899100 | -1.94620800 | 4.18332700  | C  | 3.41751900  | 6.61235600  | -2.15947200 |
| H | -1.78792500 | -0.34324300 | -0.37285500 | H  | 3.08087100  | 7.56258200  | -1.72784700 |
| C | 2.39649900  | -1.79963800 | -0.46614400 | H  | 4.47683300  | 6.71957400  | -2.40842200 |

H 2.86258700 6.46936000 -3.09224500

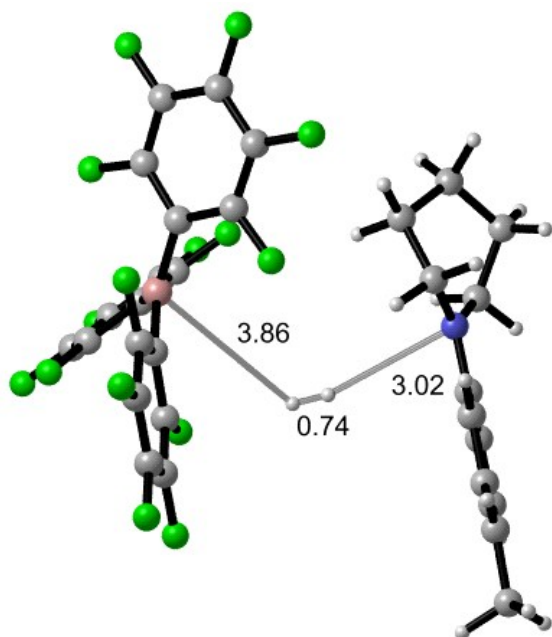

**TS<sub>3</sub>**

**G<sub>gas</sub> = -2731.323667 a.u.**

**E<sub>gas</sub> = -2731.66928116 a.u.**

H 2.07312900 0.32839800 1.72312500  
 C 4.59573100 -1.00227200 0.69117200  
 C 5.00297000 -0.41940200 -0.52843100  
 C 5.92052000 0.62935700 -0.55050000  
 C 6.48540100 1.14886200 0.61895000  
 C 6.08378000 0.56555300 1.82760400  
 C 5.16148400 -0.47525600 1.87450800  
 H 4.62517600 -0.80055500 -1.46982200  
 H 6.21335900 1.04385400 -1.51305600  
 H 6.49322900 0.94069700 2.76337100  
 H 4.86105800 -0.86432200 2.84111800  
 N 3.66554400 -2.03852000 0.73383000  
 C 2.94339800 -2.42612300 -0.47494800  
 H 3.58351300 -2.99094900 -1.17668700  
 H 2.62602800 -1.51944700 -0.99979800  
 C 1.70189500 -3.25226600 -0.12544600  
 H 1.16523700 -3.47950000 -1.05142000  
 H 1.03722300 -2.62860100 0.48438500  
 C 2.05394200 -4.54983100 0.63711500  
 H 2.12010800 -5.39527100 -0.05684800  
 H 1.24673400 -4.78940900 1.33856300  
 C 3.38984600 -4.40636700 1.39393000  
 H 4.22244800 -4.69488300 0.74129900  
 H 3.42173500 -5.08060200 2.25687000  
 C 3.63425200 -2.96849400 1.86720800  
 H 2.86448200 -2.68126400 2.60253400

H 4.59740800 -2.92370900 2.38440400  
 B -1.71778100 0.57275900 -0.28897900  
 C -1.99599300 -0.78349400 -1.03316000  
 C -3.21212100 -1.46592400 -0.89540700  
 C -1.03917600 -1.40716600 -1.84287700  
 C -3.47678500 -2.67774700 -1.52539600  
 C -1.25624600 -2.63087900 -2.46367900  
 C -2.48558400 -3.26830000 -2.30662000  
 C -1.02263500 1.76029400 -1.03255400  
 C -0.22838600 2.71140700 -0.36624200  
 C -1.14058300 1.95022700 -2.42170100  
 C 0.41333100 3.75900700 -1.01612900  
 C -0.52888000 2.99684200 -3.10184100  
 C 0.25671600 3.90378900 -2.39335600  
 C -2.14980700 0.69180900 1.21442900  
 C -1.99438300 -0.37429400 2.11302100  
 C -2.73323900 1.85149400 1.74496000  
 C -2.37716500 -0.30130200 3.44803600  
 C -3.14814900 1.95388600 3.06741700  
 C -2.96406200 0.86942600 3.92406400  
 F 0.17015100 -0.84152700 -2.01119000  
 F -0.28958200 -3.21372800 -3.18395200  
 F -2.71094600 -4.43961500 -2.89996000  
 F -4.66033400 -3.28165000 -1.38088100  
 F -4.19841100 -0.93757200 -0.15098600  
 F -1.89467300 1.12187700 -3.16039200  
 F -0.68685700 3.14126700 -4.42082600  
 F 0.85497100 4.90679000 -3.03043500  
 F 1.16945200 4.62569100 -0.33794000  
 F -0.02970500 2.62488100 0.95835100  
 F -1.42310900 -1.52305000 1.70906400  
 F -2.93749200 2.92016200 0.95767200  
 F -3.71679900 3.07376600 3.52398600  
 F -3.34682700 0.95343700 5.19683800  
 F -2.19086100 -1.33676500 4.27246500  
 H 1.54252600 0.84747800 1.76029700  
 C 7.46006000 2.30259300 0.58495400  
 H 7.95053000 2.38188200 -0.39038700  
 H 6.96216100 3.26247200 0.77598400  
 H 8.24241400 2.19132400 1.34336100

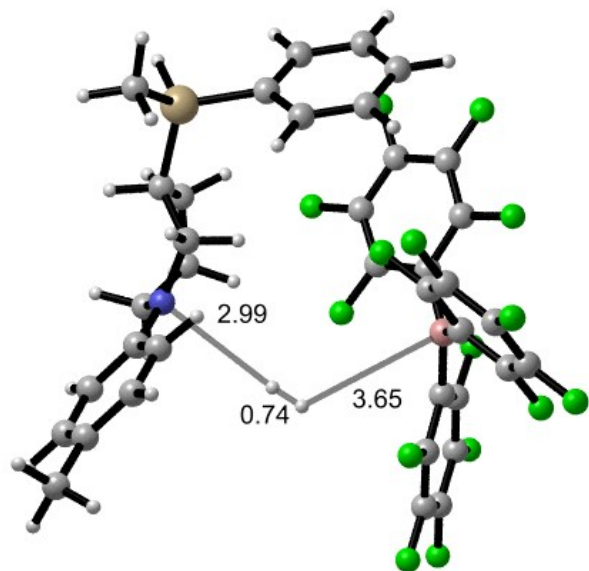

**TS'<sub>3</sub>**

**G<sub>gas</sub> = -3292.290283 a.u.**

**E<sub>gas</sub> = -3292.75424034 a.u.**

|   |             |             |             |
|---|-------------|-------------|-------------|
| H | -0.24117100 | 2.58072600  | 0.20086400  |
| C | -3.18866400 | 3.40680700  | 0.55213400  |
| C | -3.38322600 | 4.59034900  | 1.29500900  |
| C | -3.50568000 | 5.82493000  | 0.65849600  |
| C | -3.45385800 | 5.95296800  | -0.73278600 |
| C | -3.25391100 | 4.77722400  | -1.46873600 |
| C | -3.11723200 | 3.53725900  | -0.85379500 |
| H | -3.45493100 | 4.55386700  | 2.37541000  |
| H | -3.65655700 | 6.71221100  | 1.26990500  |
| H | -3.18620900 | 4.83152600  | -2.55346900 |
| H | -2.91654200 | 2.66725600  | -1.46957200 |
| N | -3.03653600 | 2.16400600  | 1.17028000  |
| C | -2.95122600 | 2.09198800  | 2.62768800  |
| H | -3.91125500 | 2.34853400  | 3.11189500  |
| H | -2.22133600 | 2.83446700  | 2.96857500  |
| C | -2.50521400 | 0.69664800  | 3.06903000  |
| H | -2.37206600 | 0.68916900  | 4.15620000  |
| H | -1.51919600 | 0.49908000  | 2.63719400  |
| C | -3.51160500 | -0.39588900 | 2.63794500  |
| H | -4.21965700 | -0.60057600 | 3.44891400  |
| H | -2.96652800 | -1.33220900 | 2.46872700  |
| C | -4.30651900 | 0.03056500  | 1.37716400  |
| H | -5.15792300 | 0.64593200  | 1.70688500  |
| C | -3.45064500 | 0.93546400  | 0.47007700  |
| H | -2.57522300 | 0.37943000  | 0.10075300  |
| H | -4.03229800 | 1.22928200  | -0.40865200 |
| B | 2.34611400  | -0.49844800 | -0.09758000 |
| C | 1.54677700  | -1.65103100 | 0.60830000  |
| C | 1.42731000  | -2.92813600 | 0.04440800  |

|    |             |             |             |
|----|-------------|-------------|-------------|
| C  | 0.85665500  | -1.45182400 | 1.81012700  |
| C  | 0.68704800  | -3.94718500 | 0.63165000  |
| C  | 0.07373800  | -2.43376600 | 2.40477200  |
| C  | -0.00912500 | -3.69103800 | 1.81019900  |
| C  | 3.29216600  | 0.43335700  | 0.72911400  |
| C  | 3.51851900  | 1.77778500  | 0.38650500  |
| C  | 3.97297300  | -0.01560300 | 1.87454300  |
| C  | 4.34287700  | 2.62240600  | 1.12026000  |
| C  | 4.82102600  | 0.79474100  | 2.62099200  |
| C  | 5.00275600  | 2.12323900  | 2.24195500  |
| C  | 2.16025200  | -0.31001400 | -1.64418100 |
| C  | 0.91281500  | -0.48588600 | -2.26232900 |
| C  | 3.22236200  | 0.00515100  | -2.50417600 |
| C  | 0.72474700  | -0.36806200 | -3.63457700 |
| C  | 3.07410300  | 0.11879800  | -3.88192500 |
| C  | 1.81462700  | -0.06958300 | -4.44952300 |
| F  | 0.89312400  | -0.24859600 | 2.41254300  |
| F  | -0.61908900 | -2.17636500 | 3.52134600  |
| F  | -0.75782500 | -4.64440900 | 2.36320100  |
| F  | 0.61211200  | -5.15585900 | 0.06288200  |
| F  | 2.06367400  | -3.21802000 | -1.10384000 |
| F  | 3.84981100  | -1.28761600 | 2.28345300  |
| F  | 5.45973500  | 0.31474600  | 3.69215800  |
| F  | 5.80416100  | 2.91469900  | 2.95058300  |
| F  | 4.51014400  | 3.89848600  | 0.76293100  |
| F  | 2.89857400  | 2.32104700  | -0.67344700 |
| F  | -0.17632700 | -0.75473100 | -1.52376200 |
| F  | 4.45823300  | 0.18102500  | -2.00947500 |
| F  | 4.12055800  | 0.40116900  | -4.66374400 |
| F  | 1.65388100  | 0.03787700  | -5.76706600 |
| F  | -0.48687100 | -0.54681500 | -4.17782100 |
| H  | 0.45208000  | 2.62269400  | -0.06444800 |
| Si | -5.11701500 | -1.44283100 | 0.47142100  |
| C  | -3.62282700 | 7.29006200  | -1.41516900 |
| H  | -4.64251500 | 7.42517400  | -1.79932800 |
| H  | -3.42405200 | 8.11719700  | -0.72669200 |
| H  | -2.94337200 | 7.39577600  | -2.26800600 |
| C  | -3.85460200 | -2.55360900 | -0.38656000 |
| C  | -3.22558900 | -2.16584400 | -1.58519500 |
| C  | -3.50686600 | -3.80594300 | 0.15411200  |
| C  | -2.28943300 | -2.98603900 | -2.21638600 |
| H  | -3.46485800 | -1.20708200 | -2.03996400 |
| C  | -2.57206400 | -4.63357000 | -0.47210500 |
| H  | -3.97557200 | -4.14303900 | 1.07564600  |
| C  | -1.96207600 | -4.22420800 | -1.65990200 |
| H  | -1.81156300 | -2.65030400 | -3.13182700 |
| H  | -2.31257700 | -5.59103900 | -0.03001300 |

|   |             |             |             |
|---|-------------|-------------|-------------|
| H | -1.22863400 | -4.86417800 | -2.14185700 |
| C | -6.40975700 | -0.82138600 | -0.76097400 |
| H | -7.14998600 | -0.18495800 | -0.26419700 |
| H | -5.95895200 | -0.23524200 | -1.56899400 |
| H | -6.94201300 | -1.66056300 | -1.22011400 |
| H | -5.78259000 | -2.27579600 | 1.51577400  |

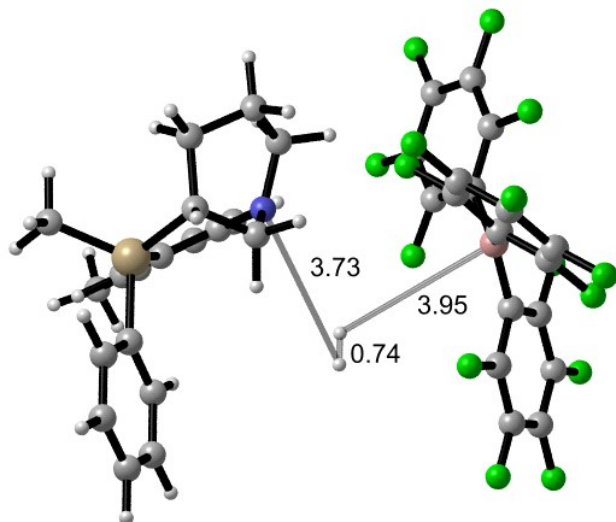

**TS''<sub>3</sub>**

**G<sub>gas</sub> = -3291.106235a.u.**

**E<sub>gas</sub> = -3291.55322062 a.u.**

|   |             |             |             |
|---|-------------|-------------|-------------|
| H | -0.68483800 | -0.02921400 | 1.98478600  |
| B | 2.72713200  | -0.09259300 | -0.01279400 |
| C | 2.33506900  | -1.51172900 | -0.55661600 |
| C | 2.80248500  | -1.99545000 | -1.78820300 |
| C | 1.48571000  | -2.37780500 | 0.14888300  |
| C | 2.47133000  | -3.25035000 | -2.28731600 |
| C | 1.11808500  | -3.63024900 | -0.32861200 |
| C | 1.61478000  | -4.06947000 | -1.55401500 |
| C | 3.01103600  | 0.11146600  | 1.51466500  |
| C | 2.66471200  | 1.29148300  | 2.19313500  |
| C | 3.62451300  | -0.87670600 | 2.30214300  |
| C | 2.89547200  | 1.48279300  | 3.55044800  |
| C | 3.88923400  | -0.71279900 | 3.65694800  |
| C | 3.51656300  | 0.47421000  | 4.28464700  |
| C | 2.83579000  | 1.11732600  | -1.00799400 |
| C | 1.96376100  | 1.27547800  | -2.09556900 |
| C | 3.81379100  | 2.11560100  | -0.87586200 |
| C | 2.03093500  | 2.34543700  | -2.97962500 |
| C | 3.92902500  | 3.18783400  | -1.75380100 |
| C | 3.02746600  | 3.30463600  | -2.81015800 |
| F | 0.96676900  | -2.00610200 | 1.32914000  |
| F | 0.27955800  | -4.40861800 | 0.36712300  |
| F | 1.27517900  | -5.26922200 | -2.02129300 |

|    |             |             |             |
|----|-------------|-------------|-------------|
| F  | 2.95897700  | -3.67369500 | -3.45762300 |
| F  | 3.63577700  | -1.25006900 | -2.53309600 |
| F  | 4.01604700  | -2.03644600 | 1.74977900  |
| F  | 4.49294300  | -1.67666700 | 4.35900000  |
| F  | 3.75407700  | 0.64464700  | 5.58342800  |
| F  | 2.53078900  | 2.61772900  | 4.15447400  |
| F  | 2.05281600  | 2.29214100  | 1.54084300  |
| F  | 0.97363500  | 0.38695800  | -2.30630500 |
| F  | 4.71450500  | 2.05110100  | 0.11761200  |
| F  | 4.88960500  | 4.10303000  | -1.59463500 |
| F  | 3.11690800  | 4.33077600  | -3.65377000 |
| F  | 1.15687600  | 2.45841100  | -3.98474700 |
| H  | -0.72940700 | 0.58966500  | 2.39401900  |
| C  | -3.19064800 | -1.46003400 | 0.05050200  |
| C  | -2.91808000 | -2.71642800 | 0.62581500  |
| C  | -3.85596500 | -3.35633000 | 1.42487100  |
| C  | -5.09897900 | -2.76722300 | 1.70503400  |
| C  | -5.36252400 | -1.52532900 | 1.12492000  |
| C  | -4.45006900 | -0.85242200 | 0.28833800  |
| H  | -1.94473100 | -3.17072800 | 0.46782800  |
| H  | -3.61032700 | -4.32316000 | 1.85943800  |
| H  | -6.33282600 | -1.06830400 | 1.31667100  |
| N  | -2.16733700 | -0.85204600 | -0.72698100 |
| C  | -1.75528800 | -1.55576100 | -1.96589100 |
| H  | -2.20543700 | -2.55240200 | -1.95186600 |
| H  | -0.66567000 | -1.68866300 | -1.97957500 |
| C  | -2.19660900 | -0.79712500 | -3.24210700 |
| H  | -2.24511600 | -1.50195300 | -4.08036200 |
| H  | -1.44053200 | -0.05041700 | -3.51151100 |
| C  | -3.55576900 | -0.10899800 | -3.03082500 |
| H  | -4.30436000 | -0.89198800 | -2.84971700 |
| H  | -3.87106800 | 0.39796600  | -3.94883300 |
| Si | -4.96247500 | 0.71298300  | -0.63413900 |
| C  | -5.05411000 | 2.20692300  | 0.52702800  |
| C  | -4.66117400 | 2.13100200  | 1.87581400  |
| C  | -5.50892500 | 3.45274000  | 0.05207700  |
| C  | -4.71714000 | 3.24785000  | 2.71328800  |
| H  | -4.31097800 | 1.18374800  | 2.27733800  |
| C  | -5.56618000 | 4.57257200  | 0.88223000  |
| H  | -5.82563300 | 3.55578400  | -0.98420100 |
| C  | -5.16928700 | 4.47135400  | 2.21775900  |
| H  | -4.40899400 | 3.16179500  | 3.75194400  |
| H  | -5.92082300 | 5.52205300  | 0.48996300  |
| H  | -5.21394200 | 5.34130300  | 2.86734800  |
| C  | -6.64025200 | 0.48628700  | -1.48064100 |
| H  | -7.42093000 | 0.25695000  | -0.74785300 |
| H  | -6.94428300 | 1.39717000  | -2.00807900 |

|   |             |             |             |
|---|-------------|-------------|-------------|
| H | -6.61608000 | -0.33100300 | -2.20813900 |
| C | -2.28415200 | 0.58909500  | -0.95095900 |
| H | -1.34820700 | 0.92388400  | -1.41063200 |
| H | -2.34636500 | 1.09472100  | 0.01931800  |
| C | -3.51032000 | 0.90766300  | -1.84577600 |
| H | -3.42875800 | 1.93327100  | -2.22588500 |
| C | -6.10147700 | -3.45288300 | 2.60342700  |
| H | -6.30152800 | -4.47938600 | 2.27502400  |
| H | -5.74117800 | -3.51302200 | 3.63796100  |
| H | -7.05462300 | -2.91624200 | 2.61843300  |

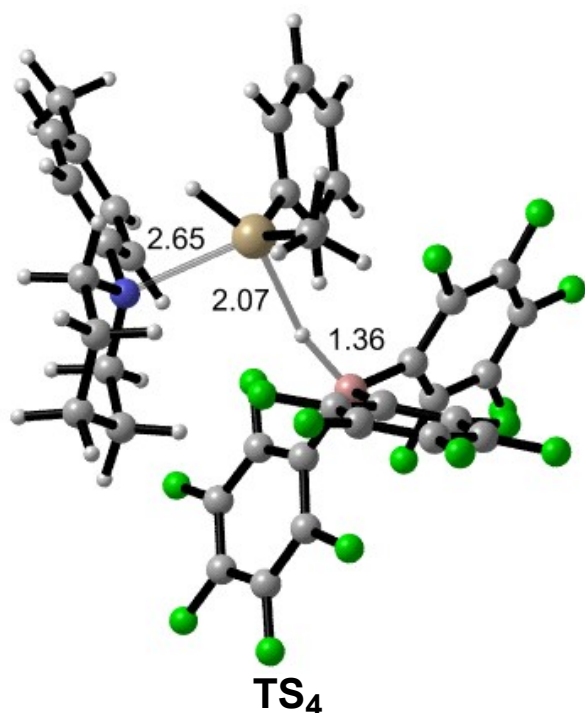

**G<sub>gas</sub> = -3292.235796 a.u.**

**E<sub>gas</sub> = -3292.71575531 a.u.**

|    |             |             |             |
|----|-------------|-------------|-------------|
| Si | 1.42716400  | -0.07436200 | -1.94319500 |
| H  | 2.51746800  | -0.70268200 | -2.73368700 |
| C  | 2.24169300  | 1.49151900  | -1.31507600 |
| C  | 3.17987100  | 2.02615900  | -2.22251900 |
| C  | 2.02149700  | 2.17270000  | -0.10833800 |
| C  | 3.83286200  | 3.22915600  | -1.95461600 |
| H  | 3.41099600  | 1.50007900  | -3.14576200 |
| C  | 2.69247700  | 3.36409200  | 0.16963700  |
| H  | 1.33816500  | 1.76827500  | 0.62396400  |
| C  | 3.58996600  | 3.90016600  | -0.75522900 |
| H  | 4.53930100  | 3.63187100  | -2.67473200 |
| H  | 2.51163600  | 3.87416400  | 1.11138000  |
| H  | 4.10540400  | 4.83148300  | -0.53819000 |
| B  | -1.23274100 | 0.17173900  | 0.15437500  |
| C  | -1.16019000 | -0.79495300 | 1.46812300  |

|   |             |             |             |
|---|-------------|-------------|-------------|
| C | -0.03220500 | -0.81158900 | 2.28807800  |
| C | -2.19730200 | -1.61903300 | 1.91997000  |
| C | 0.11125000  | -1.58972800 | 3.42857600  |
| C | -2.10870500 | -2.41341600 | 3.06518000  |
| C | -0.94476900 | -2.40554900 | 3.82509600  |
| C | -2.41709900 | -0.26207200 | -0.88375900 |
| C | -3.61612100 | 0.43966700  | -1.05870300 |
| C | -2.34161300 | -1.43729100 | -1.63070300 |
| C | -4.63119700 | 0.02995800  | -1.92355800 |
| C | -3.31841300 | -1.88641200 | -2.51119000 |
| C | -4.48346100 | -1.14095000 | -2.65912800 |
| C | -1.26050800 | 1.76801100  | 0.51321300  |
| C | -1.46485400 | 2.30448800  | 1.79003100  |
| C | -1.14355600 | 2.73472000  | -0.49100700 |
| C | -1.51838000 | 3.67429100  | 2.05467300  |
| C | -1.18948300 | 4.10672100  | -0.27854000 |
| C | -1.37909400 | 4.58472800  | 1.01482400  |
| F | -3.13986400 | -3.18292800 | 3.43782800  |
| F | -3.37457500 | -1.68167100 | 1.26820800  |
| F | -0.83957000 | -3.16770600 | 4.91888300  |
| F | 1.25568900  | -1.57147700 | 4.13025000  |
| F | 1.03468100  | -0.02788000 | 1.97205600  |
| F | -1.23429200 | -2.22000300 | -1.52947400 |
| F | -3.14630100 | -3.01951300 | -3.20928700 |
| F | -5.44594100 | -1.54516900 | -3.49481400 |
| F | -5.75321300 | 0.75180900  | -2.04340300 |
| F | -3.87135900 | 1.56466400  | -0.36345300 |
| F | -0.96087000 | 2.34636900  | -1.77522300 |
| F | -1.05540600 | 4.96615400  | -1.29814000 |
| F | -1.42587400 | 5.90042400  | 1.25161200  |
| F | -1.71190500 | 4.11573700  | 3.30561800  |
| F | -1.64397700 | 1.51173700  | 2.86675700  |
| H | -0.05712100 | -0.06060800 | -0.49646900 |
| C | 1.39049100  | -3.94885100 | -2.03066800 |
| H | 0.58433500  | -3.29507100 | -2.37561600 |
| H | 1.58088100  | -4.66802600 | -2.83570600 |
| C | 2.67229100  | -3.14441800 | -1.82385700 |
| H | 3.49909800  | -3.83025900 | -1.58467700 |
| H | 2.93329400  | -2.62907500 | -2.74936800 |
| C | 0.07325400  | -0.04425700 | -3.24465900 |
| H | -0.11840600 | -1.05532300 | -3.61292500 |
| H | -0.85713600 | 0.43141200  | -2.95423600 |
| H | 0.52834600  | 0.52372100  | -4.06854400 |
| N | 2.58378200  | -2.12921400 | -0.73164800 |
| C | 3.85855200  | -1.45097200 | -0.50862700 |
| C | 4.02414600  | -0.62899400 | 0.62091100  |
| C | 4.93615200  | -1.56333200 | -1.39725100 |

|   |            |             |             |   |             |             |             |
|---|------------|-------------|-------------|---|-------------|-------------|-------------|
| C | 5.22431300 | 0.03166200  | 0.85081800  | H | -0.47970900 | -0.14479500 | 1.95550600  |
| H | 3.21125800 | -0.47929200 | 1.31853400  | C | -1.61365000 | 2.78678700  | 3.23335400  |
| C | 6.13456100 | -0.88505800 | -1.15610800 | H | -3.68196800 | 3.28956200  | 3.59522300  |
| H | 4.87438600 | -2.17972100 | -2.28332900 | H | 0.34946300  | 2.02735900  | 2.74594200  |
| C | 6.30929900 | -0.07986100 | -0.03076600 | H | -1.23982300 | 3.74394400  | 3.58531900  |
| H | 5.31303000 | 0.65878600  | 1.73421500  | B | 2.88758400  | -0.14672000 | 0.13001900  |
| H | 6.94922400 | -0.99835400 | -1.86683200 | C | 3.30361400  | -1.07660500 | -1.15695600 |
| C | 0.96076200 | -4.66024100 | -0.74614800 | C | 2.59241400  | -0.98454200 | -2.35521700 |
| H | 1.70087400 | -5.42975200 | -0.48591600 | C | 4.33885700  | -2.01528600 | -1.17431900 |
| H | 0.00404300 | -5.17249200 | -0.89009400 | C | 2.86294900  | -1.75618900 | -3.48306600 |
| C | 7.60180700 | 0.65486900  | 0.22912500  | C | 4.64667900  | -2.80981200 | -2.27802400 |
| H | 8.35960600 | 0.40850300  | -0.51955200 | C | 3.89999500  | -2.68110600 | -3.44508800 |
| H | 7.45129100 | 1.74056000  | 0.20747500  | C | 2.98253900  | -0.97272300 | 1.54798100  |
| H | 8.01087000 | 0.40727300  | 1.21505000  | C | 4.05838500  | -0.97385200 | 2.44045900  |
| C | 2.13858900 | -2.81713000 | 0.53213400  | C | 1.90876400  | -1.75547100 | 1.96434900  |
| H | 2.01274900 | -2.06648800 | 1.30497900  | C | 4.05800900  | -1.66636100 | 3.65193700  |
| H | 2.96224200 | -3.47553800 | 0.84729200  | C | 1.85202100  | -2.46121000 | 3.16121100  |
| C | 0.85702700 | -3.63261600 | 0.38207800  | C | 2.94553900  | -2.41901400 | 4.01826100  |
| H | 0.01439000 | -2.96550700 | 0.19447700  | C | 3.66873900  | 1.29747200  | 0.14403200  |
| H | 0.66826200 | -4.12307800 | 1.34379400  | C | 5.00151100  | 1.50842200  | -0.22227400 |

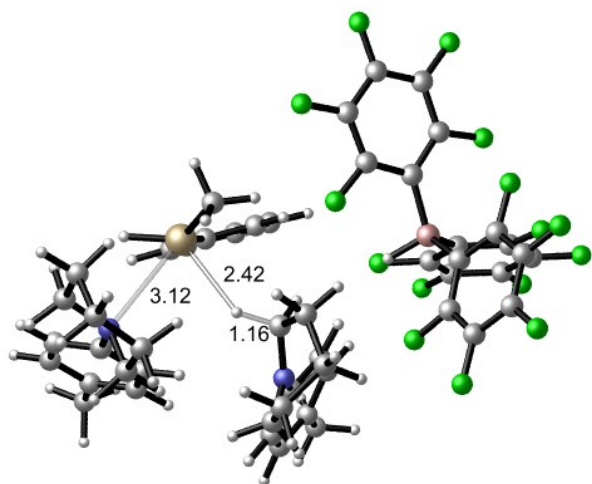

TS'4

$G_{\text{gas}} = -3814.264985 \text{ a.u.}$

$E_{\text{gas}} = -3814.99036222 \text{ a.u.}$

|    |             |             |            |   |            |             |             |
|----|-------------|-------------|------------|---|------------|-------------|-------------|
| Si | -3.26476100 | -1.29828100 | 1.82307600 | F | 5.65272100 | -3.69850000 | -2.22882400 |
| H  | -4.62352100 | -1.44965900 | 2.36773300 | F | 5.10836100 | -2.19971000 | -0.08339100 |
| C  | -2.57372200 | 0.32130200  | 2.31288000 | F | 4.17494100 | -3.43932100 | -4.51759300 |
| C  | -3.47047000 | 1.31397500  | 2.77512400 | F | 2.11633500 | -1.62905000 | -4.59943400 |
| C  | -1.18701500 | 0.59585100  | 2.31216700 | F | 1.55218200 | -0.11996600 | -2.47569200 |
| C  | -2.98894600 | 2.53401700  | 3.23794700 | F | 0.78543100 | -1.84732400 | 1.17951500  |
| H  | -4.54091800 | 1.12900100  | 2.76717600 | F | 0.75447200 | -3.17523800 | 3.49252300  |
| C  | -0.71367900 | 1.82030200  | 2.77311600 | F | 2.92620500 | -3.08979700 | 5.17974700  |
|    |             |             |            | F | 5.12096400 | -1.62058900 | 4.46960300  |
|    |             |             |            | F | 5.17555100 | -0.27919300 | 2.16051700  |
|    |             |             |            | F | 1.67963300 | 2.41400600  | 0.87089500  |
|    |             |             |            | F | 2.77873000 | 4.82347200  | 0.72398900  |

|   |             |             |             |   |             |             |             |
|---|-------------|-------------|-------------|---|-------------|-------------|-------------|
| F | 5.41268300  | 5.11881300  | -0.01912900 | H | -4.19416100 | -3.47531700 | -1.20778400 |
| F | 6.88530100  | 2.90016800  | -0.64618700 | H | -5.26364400 | -3.71568300 | -2.58698400 |
| F | 5.78985300  | 0.46700100  | -0.54923700 | C | -0.72711600 | 2.13554100  | -1.23632900 |
| H | -2.54628400 | -0.93620400 | -0.45883200 | C | -1.77041600 | 1.59461400  | -2.01577100 |
| C | -6.13620900 | -3.91447300 | 0.75947600  | C | -2.62162200 | 2.49129900  | -2.68767100 |
| H | -5.14211700 | -3.99048000 | 1.21786300  | C | -2.43919500 | 3.87090500  | -2.57063100 |
| H | -6.80805000 | -4.53795100 | 1.35977900  | C | -1.41857900 | 4.41128000  | -1.78397400 |
| C | -6.62291800 | -2.46536600 | 0.83473200  | C | -0.56824700 | 3.51039500  | -1.12216300 |
| H | -7.67492100 | -2.42190800 | 0.50258100  | H | -0.00223400 | 1.49194100  | -0.75282100 |
| H | -6.60222000 | -2.11940000 | 1.87224300  | H | -3.43595700 | 2.12410500  | -3.30152200 |
| C | -2.25307700 | -2.86274300 | 1.83294700  | H | -3.11133400 | 4.53582000  | -3.10806600 |
| H | -2.62983900 | -3.59543200 | 1.11508600  | H | 0.25345500  | 3.88503100  | -0.51849400 |
| H | -1.19246300 | -2.68750600 | 1.64936400  | C | -0.98842700 | -2.05343600 | -1.57825800 |
| H | -2.35906900 | -3.29644700 | 2.83687200  | H | -1.54978000 | -2.88534200 | -1.13697300 |
| N | -5.79566900 | -1.55303000 | 0.02365700  | H | 0.02899100  | -2.11797700 | -1.18686700 |
| C | -6.12649400 | -0.15807400 | 0.16655200  | C | -1.61162100 | -0.71001200 | -1.10989200 |
| C | -5.30430000 | 0.80799200  | -0.44298100 | H | -0.94428100 | -0.21398800 | -0.40915000 |
| C | -7.21238900 | 0.29737400  | 0.92701500  | C | -2.61906700 | -0.28880600 | -3.36507100 |
| C | -5.56799800 | 2.16545700  | -0.30861100 | H | -2.23955200 | 0.30107800  | -4.20612100 |
| H | -4.43177600 | 0.49946500  | -1.00807800 | H | -3.70319100 | -0.09380100 | -3.31147300 |
| C | -7.46170800 | 1.66791300  | 1.06332900  | C | -2.36857200 | -1.78295400 | -3.63099400 |
| H | -7.88410000 | -0.39744300 | 1.41526700  | H | -2.46393300 | -1.96124900 | -4.70696600 |
| C | -6.65759800 | 2.62797800  | 0.44682800  | H | -3.13908100 | -2.39371400 | -3.14524800 |
| H | -4.89802400 | 2.87480200  | -0.78743400 | C | -0.99598400 | -2.19726500 | -3.10404900 |
| H | -8.31253500 | 1.98596500  | 1.66088900  | H | -0.21586400 | -1.56991200 | -3.54375700 |
| C | -6.07622400 | -4.40873100 | -0.68870400 | H | -0.77024100 | -3.23250500 | -3.38006700 |
| H | -7.09405200 | -4.46603200 | -1.09787200 | N | -1.92872000 | 0.19823500  | -2.16651800 |
| H | -5.65878100 | -5.42005600 | -0.73740700 | H | 1.71562200  | 0.11238600  | -0.00989000 |
| C | -6.94292500 | 4.10505500  | 0.57592000  | C | -1.21778600 | 5.90182900  | -1.65793100 |
| H | -6.03884300 | 4.66603400  | 0.83583500  | H | -1.95951000 | 6.45702400  | -2.23926300 |
| H | -7.31716300 | 4.52135700  | -0.36713600 | H | -1.29503200 | 6.22988500  | -0.61460400 |
| H | -7.69567500 | 4.30199800  | 1.34428900  | H | -0.22403000 | 6.20084100  | -2.01059100 |
| C | -5.75579100 | -2.00018000 | -1.39181200 |   |             |             |             |
| H | -5.11878300 | -1.31815000 | -1.95539200 |   |             |             |             |
| H | -6.76838200 | -1.92556300 | -1.82499300 |   |             |             |             |
| C | -5.24331300 | -3.43521100 | -1.52801100 |   |             |             |             |



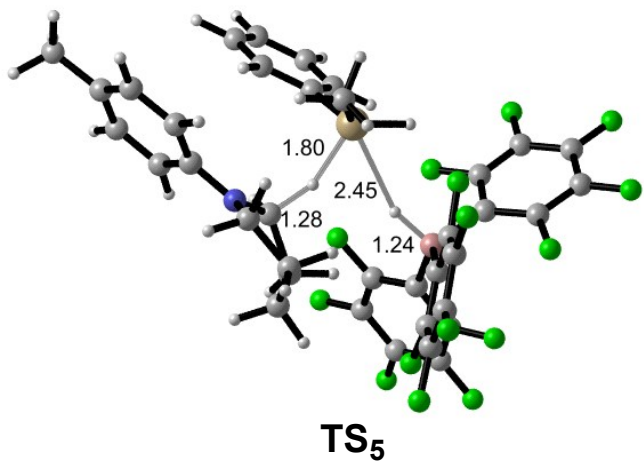

TS<sub>5</sub>

$G_{\text{gas}} = -3292.235713 \text{ a.u.}$

$E_{\text{gas}} = -3292.70935486 \text{ a.u.}$

|   |             |             |             |    |             |             |             |
|---|-------------|-------------|-------------|----|-------------|-------------|-------------|
| C | -4.77841900 | 1.09087700  | 0.35294900  | C  | 1.43978900  | 2.14009200  | -1.56300400 |
| C | -5.30202900 | 0.18587500  | 1.29326400  | C  | 2.01544700  | 2.67963300  | 0.63925400  |
| C | -6.60984500 | -0.27105400 | 1.18181000  | C  | 1.46504300  | 3.47812100  | -1.94029400 |
| C | -7.45704200 | 0.16574900  | 0.15133000  | C  | 2.05334400  | 4.03742500  | 0.31320600  |
| C | -6.93439000 | 1.08158800  | -0.76722400 | C  | 1.78625500  | 4.44292400  | -0.98859500 |
| C | -5.61992000 | 1.54254100  | -0.67497100 | C  | 2.48602700  | -0.88945700 | -0.99155500 |
| H | -4.69419800 | -0.14630300 | 2.12841200  | C  | 2.17890200  | -2.24860000 | -1.09161800 |
| H | -6.98693100 | -0.96890000 | 1.92497500  | C  | 3.58305800  | -0.49425200 | -1.76184500 |
| H | -7.56185900 | 1.44472300  | -1.57699000 | C  | 2.85472500  | -3.15294000 | -1.90478400 |
| H | -5.25768500 | 2.24881500  | -1.41320900 | C  | 4.29612500  | -1.36203700 | -2.58900500 |
| N | -3.44675700 | 1.57247400  | 0.47867500  | C  | 3.92995800  | -2.70232900 | -2.66359300 |
| C | -2.40651400 | 0.73902200  | 0.87189200  | F  | -0.25039800 | -1.41369900 | 1.86733100  |
| H | -2.77438200 | -0.21158500 | 1.25143100  | F  | 0.37860300  | -2.36163500 | 4.28013300  |
| C | -1.32588700 | 1.37108100  | 1.76271500  | F  | 2.87709800  | -1.97051600 | 5.32905400  |
| H | -0.34116200 | 1.08406700  | 1.39914000  | F  | 4.74993100  | -0.59152900 | 3.88974600  |
| H | -1.42672800 | 0.92565000  | 2.75777000  | F  | 4.13774500  | 0.37526600  | 1.44753100  |
| C | -1.43998700 | 2.89862700  | 1.82419000  | F  | 2.22304900  | 2.39873900  | 1.94477000  |
| H | -0.49858600 | 3.31613500  | 2.19157500  | F  | 2.32017500  | 4.95505600  | 1.25585000  |
| H | -2.22645400 | 3.19906000  | 2.52784300  | F  | 1.80997000  | 5.74137500  | -1.31836700 |
| C | -1.76871100 | 3.42568100  | 0.42788500  | F  | 1.17378500  | 3.84630100  | -3.19884000 |
| H | -1.00250900 | 3.08480000  | -0.27671200 | F  | 1.07992000  | 1.25989900  | -2.53453900 |
| H | -1.76537000 | 4.51921300  | 0.39053800  | F  | 1.15501600  | -2.76066300 | -0.35575700 |
| C | -3.15436600 | 2.93481800  | -0.00967400 | F  | 4.01473900  | 0.78261900  | -1.74144700 |
| H | -3.93698500 | 3.58802600  | 0.39168000  | F  | 5.33632800  | -0.91828600 | -3.31032700 |
| H | -3.23174900 | 2.97038100  | -1.10458200 | F  | 4.60371300  | -3.54775400 | -3.45484000 |
| B | 1.61434800  | 0.05840100  | 0.02278600  | F  | 2.48425400  | -4.44333500 | -1.95778200 |
| C | 1.91881800  | -0.44490900 | 1.54769500  | H  | 0.42413200  | -0.20154900 | -0.20994000 |
| C | 3.18077700  | -0.28921300 | 2.12627300  | C  | -8.88779500 | -0.30793800 | 0.06548900  |
| C | 1.01110800  | -1.16967600 | 2.31813800  | H  | -9.30440500 | -0.14408400 | -0.93216500 |
| C | 3.52307800  | -0.78142600 | 3.38169200  | H  | -8.97211100 | -1.37439500 | 0.29738500  |
| C | 1.30474000  | -1.68225400 | 3.58125700  | H  | -9.52537300 | 0.22801600  | 0.77936000  |
| C | 2.57255700  | -1.48686800 | 4.11689200  | Si | -1.51418100 | -0.77359600 | -1.58698000 |
| C | 1.72933700  | 1.66675900  | -0.27861800 | H  | -1.77615200 | 0.26928900  | -0.14205200 |
|   |             |             |             | H  | -0.20015600 | -1.24385500 | -2.03901500 |
|   |             |             |             | C  | -2.59296300 | -2.21972300 | -1.14354400 |
|   |             |             |             | C  | -1.98321800 | -3.45703600 | -0.84627900 |
|   |             |             |             | C  | -4.00066900 | -2.15126000 | -1.16994400 |
|   |             |             |             | C  | -2.76011800 | -4.58606900 | -0.58690500 |
|   |             |             |             | H  | -0.90148800 | -3.53627300 | -0.81993700 |
|   |             |             |             | C  | -4.77310100 | -3.28248700 | -0.91574200 |
|   |             |             |             | H  | -4.50224200 | -1.21404800 | -1.39426600 |
|   |             |             |             | C  | -4.15297600 | -4.50012000 | -0.62132200 |
|   |             |             |             | H  | -2.27693200 | -5.53147200 | -0.35939500 |
|   |             |             |             | H  | -5.85642700 | -3.21443000 | -0.94618600 |
|   |             |             |             | H  | -4.75626300 | -5.38092300 | -0.42017200 |
|   |             |             |             | C  | -2.23726000 | 0.50178200  | -2.75928200 |
|   |             |             |             | H  | -1.54916300 | 1.34488400  | -2.86444800 |

|   |             |            |             |
|---|-------------|------------|-------------|
| H | -2.33153300 | 0.02937400 | -3.74511100 |
| H | -3.22180900 | 0.86219500 | -2.45429600 |

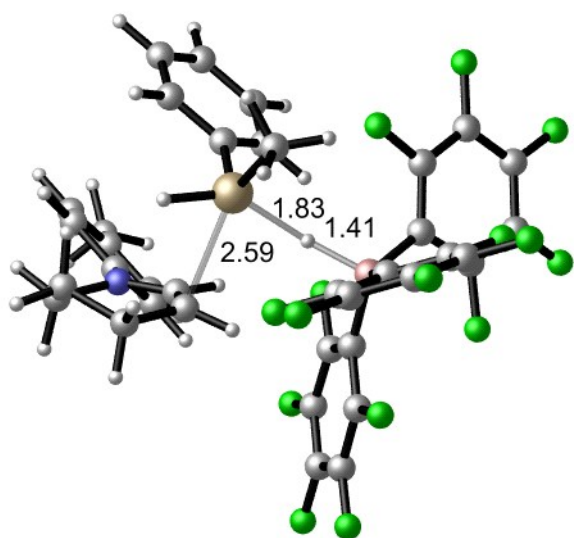

**TS<sub>6</sub>**

**G<sub>gas</sub> = -3291.057639 a.u.**

**E<sub>gas</sub> = -3291.51266972 a.u.**

|    |             |             |             |
|----|-------------|-------------|-------------|
| Si | 0.25860900  | -0.58873700 | -2.31396800 |
| H  | 0.79021300  | -1.75737200 | -3.07464300 |
| C  | 1.57095300  | 0.75475600  | -2.44451400 |
| C  | 2.38396000  | 0.71946500  | -3.59409700 |
| C  | 1.78688300  | 1.78785500  | -1.51734600 |
| C  | 3.36330400  | 1.68915900  | -3.81732600 |
| H  | 2.25270900  | -0.07179700 | -4.32919600 |
| C  | 2.77153300  | 2.75273300  | -1.73309500 |
| H  | 1.19428200  | 1.83653700  | -0.61133600 |
| C  | 3.55918000  | 2.70856300  | -2.88475800 |
| H  | 3.97225200  | 1.64603700  | -4.71626900 |
| H  | 2.92255600  | 3.54065700  | -1.00070400 |
| H  | 4.32284000  | 3.46270900  | -3.05282500 |
| B  | -1.56315200 | 0.10180200  | 0.22336000  |
| C  | -0.96339800 | -0.70798200 | 1.50390300  |
| C  | 0.26347600  | -0.33337300 | 2.06147100  |
| C  | -1.58590800 | -1.77220100 | 2.16812100  |
| C  | 0.86810800  | -0.96983100 | 3.13653300  |
| C  | -1.02525700 | -2.43139700 | 3.26425600  |
| C  | 0.21501800  | -2.03513700 | 3.74995200  |
| C  | -2.90889800 | -0.51657000 | -0.43628300 |
| C  | -4.14994500 | 0.12979000  | -0.46416600 |
| C  | -2.91572300 | -1.78784100 | -1.01587000 |
| C  | -5.29479200 | -0.43030700 | -1.03429700 |
| C  | -4.02281900 | -2.38323400 | -1.60393600 |
| C  | -5.23294500 | -1.69388800 | -1.60975800 |
| C  | -1.60184500 | 1.71045700  | 0.47368800  |

|   |             |             |             |
|---|-------------|-------------|-------------|
| C | -1.87040000 | 2.24957900  | 1.73852400  |
| C | -1.46069500 | 2.66688500  | -0.53273300 |
| C | -1.95191000 | 3.61539500  | 1.99740100  |
| C | -1.52616800 | 4.04234000  | -0.32226200 |
| C | -1.77473100 | 4.52300300  | 0.95823800  |
| F | -1.67457500 | -3.44546100 | 3.84918400  |
| F | -2.79527700 | -2.22220200 | 1.78857100  |
| F | 0.77391700  | -2.66575800 | 4.78677500  |
| F | 2.08013600  | -0.58208800 | 3.57232400  |
| F | 0.96698400  | 0.69088500  | 1.51331900  |
| F | -1.76463400 | -2.51108900 | -1.04441500 |
| F | -3.93796900 | -3.60029200 | -2.15943700 |
| F | -6.31900600 | -2.24140100 | -2.16355500 |
| F | -6.45369000 | 0.24055500  | -1.02556200 |
| F | -4.31478900 | 1.34860900  | 0.08306400  |
| F | -1.23932800 | 2.28154200  | -1.80967000 |
| F | -1.36228400 | 4.89816600  | -1.34035800 |
| F | -1.84641300 | 5.83861200  | 1.18720300  |
| F | -2.20890900 | 4.06037900  | 3.23500400  |
| F | -2.09655000 | 1.44152200  | 2.79522900  |
| H | -0.58559500 | -0.14270600 | -0.75742100 |
| C | 1.26011500  | -2.27515000 | -0.61591100 |
| H | 0.36957400  | -2.14682400 | -0.01565200 |
| C | 2.75695500  | -3.57822000 | -2.14477400 |
| H | 2.64380600  | -2.92182100 | -3.01430100 |
| H | 2.99221800  | -4.57880300 | -2.52214700 |
| C | 3.93290900  | -3.08367300 | -1.30168500 |
| H | 4.17853000  | -3.81285300 | -0.51680300 |
| H | 4.82515400  | -2.96275300 | -1.91853300 |
| C | 2.36371600  | -1.52337300 | -0.27064200 |
| H | 2.25271300  | -0.61709200 | 0.31000400  |
| C | -1.29054200 | -0.27139200 | -3.35412500 |
| H | -1.84853700 | -1.19822900 | -3.51087600 |
| H | -1.96008500 | 0.50576000  | -2.99435500 |
| H | -0.89321800 | 0.03409200  | -4.33207100 |
| N | 3.63449800  | -1.79145300 | -0.65336100 |
| C | 4.72196200  | -0.98318400 | -0.19378500 |
| C | 4.77608400  | -0.54398700 | 1.13496600  |
| C | 5.74883900  | -0.62133200 | -1.07428100 |
| C | 5.83777900  | 0.25162500  | 1.56300900  |
| H | 3.99459200  | -0.81758400 | 1.83670400  |
| C | 6.81148200  | 0.15897400  | -0.62679800 |
| H | 5.69999600  | -0.91989800 | -2.11652700 |
| C | 6.87941600  | 0.60999100  | 0.69867000  |
| H | 5.85963200  | 0.58755000  | 2.59642400  |
| H | 7.59493000  | 0.43692600  | -1.32722500 |
| C | 1.44935500  | -3.58914900 | -1.34000800 |

|   |            |             |             |
|---|------------|-------------|-------------|
| H | 1.46281100 | -4.41168600 | -0.61048200 |
| H | 0.60262900 | -3.78903000 | -2.00547800 |
| C | 8.04836300 | 1.43434400  | 1.18253200  |
| H | 8.86519100 | 0.79365300  | 1.53792100  |
| H | 8.45361300 | 2.06200900  | 0.38308700  |
| H | 7.76191000 | 2.08602700  | 2.01302400  |

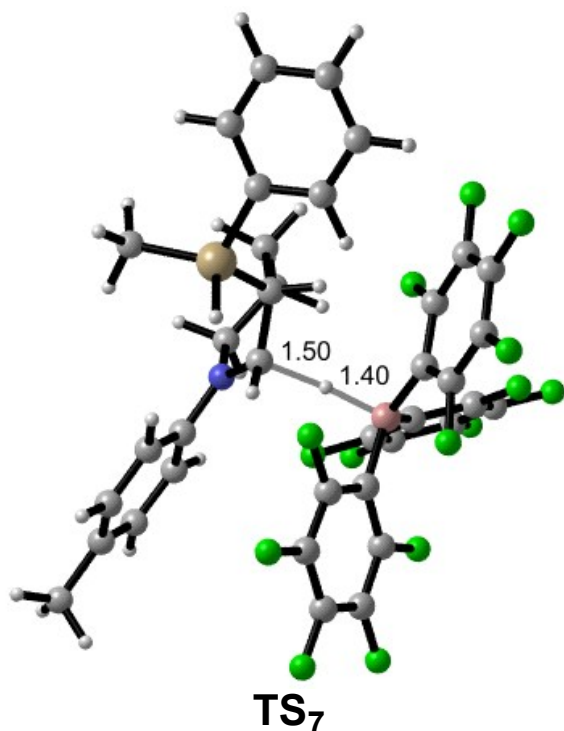

**G<sub>gas</sub> = -3291.093723 a.u.**

**E<sub>gas</sub> = -3291.54794388 a.u.**

|   |             |             |             |
|---|-------------|-------------|-------------|
| C | 1.98967400  | -2.54834300 | -1.47079800 |
| C | 3.24036100  | -2.31459400 | -2.05604500 |
| C | 4.33699300  | -3.09919200 | -1.70285500 |
| C | 4.23406100  | -4.13005600 | -0.76187900 |
| C | 2.97474200  | -4.36217300 | -0.19240300 |
| C | 1.86714100  | -3.59762200 | -0.54534900 |
| H | 3.37984000  | -1.50497500 | -2.76041800 |
| H | 5.29825200  | -2.89251700 | -2.16593200 |
| H | 2.85069900  | -5.16776300 | 0.52655200  |
| H | 0.90103700  | -3.83404600 | -0.11096800 |
| N | 0.83323300  | -1.78795200 | -1.83470600 |
| C | -1.75161100 | -1.03715200 | -2.79450200 |
| H | -2.62133400 | -0.38664700 | -2.91517100 |
| H | -1.96226200 | -1.95499400 | -3.35800400 |
| C | -0.50309700 | -0.38083400 | -3.38959000 |
| H | -0.32892900 | 0.58333800  | -2.90382500 |
| H | -0.63405600 | -0.18401800 | -4.45878000 |

|    |             |             |             |
|----|-------------|-------------|-------------|
| C  | 0.72078600  | -1.27907600 | -3.21744400 |
| H  | 0.67588000  | -2.14262100 | -3.89288500 |
| H  | 1.62275500  | -0.71222100 | -3.45882200 |
| C  | -0.08466600 | -1.42469000 | -0.89970300 |
| H  | 0.11396500  | -1.84842600 | 0.07605600  |
| C  | -1.53925600 | -1.34491500 | -1.29115900 |
| H  | -1.99863900 | -0.56053600 | -0.68551500 |
| Si | -2.49699400 | -2.91578400 | -0.68732000 |
| H  | -1.95101900 | -3.23801000 | 0.66147200  |
| C  | -4.30447400 | -2.41928900 | -0.53752100 |
| C  | -4.66288700 | -1.39925000 | 0.36490500  |
| C  | -5.32269400 | -2.98872000 | -1.32131900 |
| C  | -5.97832100 | -0.94901500 | 0.46933900  |
| H  | -3.90428800 | -0.94382800 | 0.99748200  |
| C  | -6.64522200 | -2.55176100 | -1.21246700 |
| H  | -5.08808200 | -3.78194500 | -2.02692400 |
| C  | -6.97328000 | -1.52821700 | -0.32217700 |
| H  | -6.21924100 | -0.14359900 | 1.15713500  |
| H  | -7.41750000 | -3.00678100 | -1.82646000 |
| H  | -7.99997200 | -1.18181900 | -0.24525500 |
| C  | -2.24046100 | -4.39884400 | -1.82561000 |
| H  | -2.64615100 | -4.23205800 | -2.82842100 |
| H  | -1.17576200 | -4.63227300 | -1.93159300 |
| H  | -2.73286700 | -5.28481100 | -1.41110500 |
| B  | 0.43579900  | 1.06572700  | 0.43572200  |
| C  | -1.06563700 | 1.41808700  | 0.94237600  |
| C  | -1.49362600 | 1.43977400  | 2.27610000  |
| C  | -2.06711200 | 1.74957900  | 0.01915000  |
| C  | -2.80661900 | 1.71664100  | 2.66096300  |
| C  | -3.38660900 | 2.03167100  | 0.35429500  |
| C  | -3.76220400 | 2.00753100  | 1.69392600  |
| C  | 1.06371900  | 2.15002300  | -0.59599900 |
| C  | 2.05778200  | 1.79426900  | -1.50807400 |
| C  | 0.70448400  | 3.50129600  | -0.64064300 |
| C  | 2.63076200  | 2.66306700  | -2.42857000 |
| C  | 1.25760900  | 4.41543900  | -1.53740700 |
| C  | 2.22491600  | 3.99425700  | -2.44370000 |
| C  | 1.47006800  | 0.46245300  | 1.53072300  |
| C  | 1.15942800  | -0.68258500 | 2.27280600  |
| C  | 2.73594300  | 0.99212200  | 1.80731300  |
| C  | 2.01271400  | -1.28732500 | 3.18576200  |
| C  | 3.62615000  | 0.42506200  | 2.72085400  |
| C  | 3.26614500  | -0.72448000 | 3.41292300  |
| F  | -1.77474700 | 1.79205900  | -1.30405500 |
| F  | -4.29351700 | 2.30925900  | -0.59185800 |
| F  | -5.03404900 | 2.24274100  | 2.04297400  |
| F  | -3.15084600 | 1.70925200  | 3.95514400  |

|   |             |             |             |
|---|-------------|-------------|-------------|
| F | -0.63734900 | 1.20664400  | 3.28724700  |
| F | -0.20723800 | 4.00221000  | 0.21573100  |
| F | 0.86562600  | 5.69660700  | -1.53108700 |
| F | 2.75950200  | 4.85567900  | -3.31583100 |
| F | 3.56507800  | 2.22992600  | -3.29025700 |
| F | 2.52227400  | 0.52064600  | -1.52035100 |
| F | -0.05377500 | -1.27497300 | 2.11362400  |
| F | 3.16993900  | 2.11507700  | 1.20302700  |
| F | 4.82504500  | 0.98355600  | 2.93576800  |
| F | 4.10953400  | -1.28370600 | 4.28724700  |
| F | 1.64327400  | -2.39290300 | 3.84829800  |
| H | 0.21186400  | -0.05291100 | -0.38029500 |
| C | 5.43618800  | -4.94873500 | -0.35844500 |
| H | 5.15954200  | -5.98384400 | -0.13594100 |
| H | 6.19494500  | -4.96147900 | -1.14601900 |
| H | 5.90752000  | -4.53829200 | 0.54322100  |

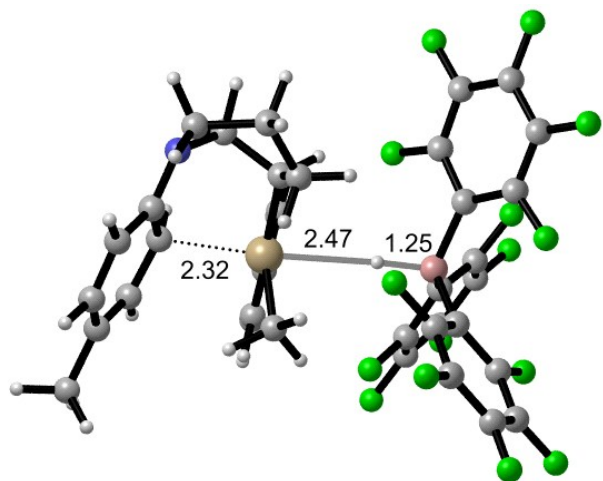

**TS<sub>8</sub>**

**G<sub>gas</sub> = -3291.072351 a.u.**

**E<sub>gas</sub> = -3291.53666076 a.u.**

|   |            |             |             |
|---|------------|-------------|-------------|
| C | 4.95019300 | -1.07137500 | -0.45234700 |
| C | 4.58612200 | 0.32565900  | -0.42166200 |
| C | 5.14135100 | 1.18016300  | 0.58244300  |
| C | 5.90590500 | 0.69786300  | 1.62053500  |
| C | 6.20227700 | -0.69274000 | 1.60036400  |
| C | 5.75890500 | -1.54977800 | 0.61495500  |
| H | 4.37040800 | 0.81313800  | -1.36783100 |
| H | 4.91817100 | 2.24153900  | 0.51474900  |
| H | 6.82469400 | -1.10253500 | 2.39278200  |
| H | 6.07210600 | -2.58546300 | 0.64749600  |
| N | 4.49148000 | -1.86473200 | -1.46515700 |
| C | 2.00811100 | -2.62254500 | -0.60870300 |
| H | 0.95524700 | -2.90492200 | -0.57006700 |
| H | 2.32946800 | -2.55309000 | 0.43611900  |

|    |             |             |             |
|----|-------------|-------------|-------------|
| C  | 2.84439200  | -3.72134900 | -1.28444300 |
| H  | 2.47687400  | -3.91140300 | -2.29836200 |
| H  | 2.73735900  | -4.66444900 | -0.73962600 |
| C  | 4.34535100  | -3.33219100 | -1.31768000 |
| H  | 4.82592000  | -3.64724700 | -0.39284900 |
| H  | 4.86547800  | -3.82744900 | -2.14504900 |
| C  | 2.15277400  | -1.24328200 | -1.33704600 |
| H  | 1.27370700  | -1.04347000 | -1.95349800 |
| Si | 2.29107500  | 0.22386100  | -0.12883200 |
| C  | 1.95202400  | 1.91992100  | -0.82798300 |
| C  | 1.60438500  | 2.11008900  | -2.17916400 |
| C  | 2.08491200  | 3.05813100  | -0.00850000 |
| C  | 1.40456300  | 3.39193800  | -2.69223800 |
| H  | 1.45365100  | 1.25755300  | -2.83326000 |
| C  | 1.88074200  | 4.33918400  | -0.51965600 |
| H  | 2.32274600  | 2.94661500  | 1.04551700  |
| C  | 1.54378900  | 4.50728500  | -1.86448700 |
| H  | 1.12424900  | 3.51767400  | -3.73382600 |
| H  | 1.96464500  | 5.20171100  | 0.13395100  |
| H  | 1.37740000  | 5.50401200  | -2.26239500 |
| C  | 2.15654800  | 0.00031800  | 1.72463800  |
| H  | 3.11930400  | 0.12354000  | 2.22649500  |
| H  | 1.44941800  | 0.73913400  | 2.10847700  |
| H  | 1.75068100  | -0.98511400 | 1.95628900  |
| C  | 3.39280100  | -1.31626300 | -2.26668000 |
| H  | 3.66569900  | -0.35815600 | -2.71277900 |
| H  | 3.21846700  | -1.99499000 | -3.10394600 |
| B  | -1.39440500 | -0.13819500 | 0.16024200  |
| C  | -1.84559900 | 1.41030100  | -0.12865900 |
| C  | -2.77404700 | 1.84417700  | -1.07727500 |
| C  | -1.26228500 | 2.44393900  | 0.60628000  |
| C  | -3.07648300 | 3.18739900  | -1.30599500 |
| C  | -1.52451400 | 3.79504400  | 0.41403800  |
| C  | -2.44447900 | 4.17352900  | -0.55804500 |
| C  | -1.73798800 | -0.61684800 | 1.69094400  |
| C  | -1.03190000 | -1.65393600 | 2.29912800  |
| C  | -2.73934100 | -0.06759100 | 2.49667200  |
| C  | -1.24041900 | -2.09890900 | 3.60025300  |
| C  | -2.99276900 | -0.47837700 | 3.80552800  |
| C  | -2.23661300 | -1.50218100 | 4.36547200  |
| C  | -1.90001800 | -1.21062900 | -0.97650100 |
| C  | -1.42472300 | -1.12763600 | -2.28654900 |
| C  | -2.78725700 | -2.27099000 | -0.76898700 |
| C  | -1.74402400 | -2.01414100 | -3.30781800 |
| C  | -3.14709900 | -3.18621200 | -1.76108800 |
| C  | -2.62168600 | -3.06068700 | -3.04130000 |
| F  | -0.36451300 | 2.15027300  | 1.58522400  |

|   |             |             |             |    |            |             |             |
|---|-------------|-------------|-------------|----|------------|-------------|-------------|
| F | -0.89314600 | 4.73253300  | 1.14462700  | H  | 0.66146900 | -2.53939200 | -0.75895300 |
| F | -2.71408300 | 5.47051000  | -0.77082400 | H  | 2.32416200 | -2.69741400 | -0.24236900 |
| F | -3.97338100 | 3.53590100  | -2.24284300 | C  | 2.03340300 | -3.19994000 | -2.31662100 |
| F | -3.45151000 | 0.96084300  | -1.84166600 | H  | 1.37261200 | -2.89255900 | -3.13646400 |
| F | -3.54088300 | 0.91141600  | 2.02909900  | H  | 1.80604500 | -4.25435300 | -2.12735800 |
| F | -3.96497800 | 0.09990200  | 4.52760900  | C  | 3.51312300 | -3.04681000 | -2.75265600 |
| F | -2.46420900 | -1.90946400 | 5.62233500  | H  | 4.12200300 | -3.85662200 | -2.34097800 |
| F | -0.49880800 | -3.09500400 | 4.11663300  | H  | 3.57293500 | -3.16445400 | -3.83994700 |
| F | -0.05445500 | -2.30575400 | 1.60711200  | C  | 1.89443100 | -0.85120600 | -1.35832700 |
| F | -0.57621400 | -0.11624300 | -2.62915800 | H  | 0.96645000 | -0.44866500 | -1.77583700 |
| F | -3.36485400 | -2.47136400 | 0.43304900  | Si | 2.19177600 | 0.17583800  | 0.19212300  |
| F | -3.99873200 | -4.18661100 | -1.48834700 | C  | 2.58973200 | 1.95523700  | -0.10255300 |
| F | -2.95051900 | -3.93374300 | -4.00401200 | C  | 2.09056100 | 2.62927300  | -1.23743000 |
| F | -1.22041500 | -1.86970100 | -4.53844500 | C  | 3.38305400 | 2.67394500  | 0.81474500  |
| H | -0.14465200 | -0.12809100 | 0.07069500  | C  | 2.38541900 | 3.97534500  | -1.44781200 |
| C | 6.44947300  | 1.58170400  | 2.71585000  | H  | 1.45183200 | 2.11209300  | -1.94674900 |
| H | 6.05676900  | 1.28934300  | 3.69651900  | C  | 3.68613700 | 4.01540600  | 0.59490400  |
| H | 7.54183600  | 1.51839400  | 2.77445800  | H  | 3.76963600 | 2.18351700  | 1.70353000  |
| H | 6.18303200  | 2.62841700  | 2.54919800  | C  | 3.18665700 | 4.66631900  | -0.53601700 |

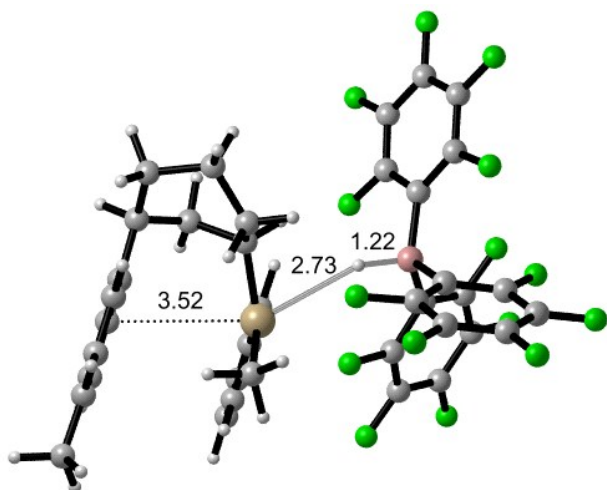

**TS'8**

**$G_{\text{gas}} = -3275.024356$  a.u.**

**$E_{\text{gas}} = -3275.49801867$  a.u.**

|   |            |             |             |   |             |             |            |
|---|------------|-------------|-------------|---|-------------|-------------|------------|
| C | 4.91818800 | -1.59052600 | -1.07735500 | C | -1.63857600 | 1.36815200  | 0.51674100 |
| C | 5.54079100 | -0.37492900 | -0.73415700 | C | -0.58188400 | 1.86996700  | 1.26150700 |
| C | 6.30515800 | -0.24364500 | 0.42572400  | C | -2.62520700 | 2.31522300  | 0.22955900 |
| C | 6.49090100 | -1.32452700 | 1.29741400  | C | -0.44513200 | 3.17796200  | 1.70755500 |
| C | 5.87431000 | -2.53645800 | 0.95978600  | C | -2.55266400 | 3.64309400  | 0.65348700 |
| C | 5.10753500 | -2.66795800 | -0.20025100 | C | -1.45918500 | 4.07921400  | 1.39933700 |
| H | 5.45084800 | 0.48079000  | -1.39827900 | C | -2.18736200 | -1.11129500 | 1.33350900 |
| H | 6.77359700 | 0.71196900  | 0.64876500  | C | -1.42038800 | -2.07972200 | 1.97797800 |
| H | 5.99536100 | -3.39686900 | 1.61353500  | C | -3.45197300 | -0.91162500 | 1.89412300 |
| H | 4.65437200 | -3.63039800 | -0.40973200 | C | -1.85091200 | -2.80570800 | 3.08774600 |
| C | 1.69202500 | -2.36594700 | -1.07339900 | C | -3.93124200 | -1.61130400 | 2.99744900 |

|   |             |             |             |    |            |             |             |
|---|-------------|-------------|-------------|----|------------|-------------|-------------|
| C | -3.12032300 | -2.56929100 | 3.60176200  | H  | 6.60901900 | -2.66299300 | 1.94317700  |
| F | -0.70062600 | 1.01602900  | -2.33390300 | H  | 5.45408100 | -3.65542900 | 0.04967100  |
| F | -1.64018400 | 0.68034200  | -4.81874300 | N  | 4.10821800 | -2.33330700 | -1.86163700 |
| F | -3.76825800 | -0.98908100 | -5.28491400 | C  | 2.06110000 | -1.23260400 | -1.61753800 |
| F | -4.91738100 | -2.31749300 | -3.18879900 | H  | 1.19203300 | -0.77002400 | -2.08670100 |
| F | -4.00477700 | -2.01068100 | -0.71171200 | Si | 2.54972700 | -0.11521200 | -0.15279900 |
| F | -3.70309200 | 1.97873000  | -0.49759300 | C  | 2.45622900 | 1.71643300  | -0.46517600 |
| F | -3.52666100 | 4.51099000  | 0.34999500  | C  | 2.10757400 | 2.22800300  | -1.73053000 |
| F | -1.38084000 | 5.35189200  | 1.80931600  | C  | 2.76262200 | 2.62930700  | 0.56334600  |
| F | 0.62851700  | 3.57072000  | 2.41201600  | C  | 2.07088100 | 3.60341500  | -1.95802400 |
| F | 0.46383100  | 1.01472000  | 1.59506300  | H  | 1.82914100 | 1.55857600  | -2.53754700 |
| F | -0.16151100 | -2.37451600 | 1.54494600  | C  | 2.72194000 | 4.00375200  | 0.33677600  |
| F | -4.28058900 | 0.00280700  | 1.35201400  | H  | 3.01329700 | 2.26975700  | 1.55690200  |
| F | -5.15774500 | -1.37479300 | 3.48644500  | C  | 2.37844300 | 4.49181800  | -0.92602800 |
| F | -3.55863800 | -3.25367800 | 4.66711500  | H  | 1.78600400 | 3.98035100  | -2.93562700 |
| F | -1.05376300 | -3.72370900 | 3.66093600  | H  | 2.93822100 | 4.69177300  | 1.14780600  |
| H | -0.44452600 | -0.49946000 | -0.04549800 | H  | 2.33853100 | 5.56284900  | -1.10134500 |
| C | 7.35141900  | -1.19997900 | 2.53193800  | C  | 2.45171900 | -0.71514500 | 1.61352100  |
| H | 8.39241700  | -1.46897100 | 2.31409900  | H  | 3.36228800 | -1.23682500 | 1.91912000  |
| H | 7.35535100  | -0.17619200 | 2.91752600  | H  | 2.28218700 | 0.13166600  | 2.28147800  |
| H | 7.00616000  | -1.86314800 | 3.33056000  | H  | 1.60078500 | -1.38994000 | 1.72032700  |
| C | 4.12613500  | -1.66826900 | -2.38715100 | C  | 3.24326300 | -1.40195200 | -2.60442600 |
| H | 4.84106900  | -1.40509900 | -3.17835600 | H  | 3.76584100 | -0.49703100 | -2.91152500 |

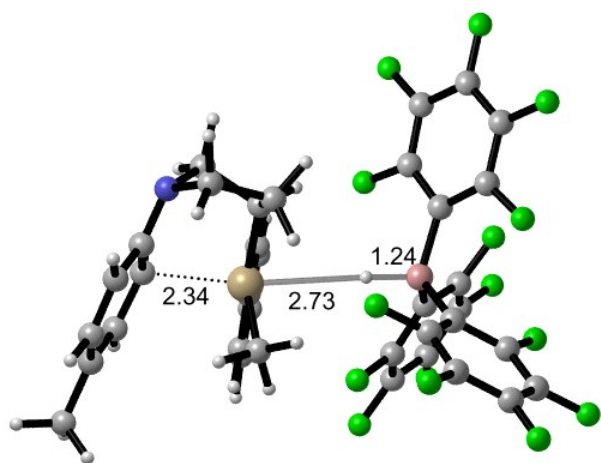

TS'8

$G_{\text{gas}} = -3251.77934 \text{ a.u.}$

$E_{\text{gas}} = -3252.21494123 \text{ a.u.}$

|   |            |             |             |   |             |             |             |
|---|------------|-------------|-------------|---|-------------|-------------|-------------|
| C | 4.79790000 | -1.77234300 | -0.80193400 | C | -3.03153300 | -1.63130400 | -1.44364400 |
| C | 4.83255400 | -0.35097800 | -0.59769000 | C | -1.85725200 | -0.71361500 | -3.76307600 |
| C | 5.58169900 | 0.19568700  | 0.48727700  | C | -3.47867000 | -2.10284600 | -2.68010900 |
| C | 6.19307800 | -0.60242400 | 1.43190900  | C | -2.89001300 | -1.64173100 | -3.85146700 |
| C | 6.11273700 | -2.00603000 | 1.23258200  | F | 0.21640400  | 1.44811700  | 1.93285700  |
| C | 5.44535200 | -2.57805300 | 0.16704000  | F | 0.14834100  | 4.09991200  | 2.28106700  |
| H | 4.67707200 | 0.31314000  | -1.44108000 | F | -1.65613700 | 5.63557300  | 0.89582100  |
| H | 5.64693500 | 1.27761900  | 0.56168700  | F | -3.38107200 | 4.43322600  | -0.85548300 |

|   |             |             |             |    |            |             |             |
|---|-------------|-------------|-------------|----|------------|-------------|-------------|
| F | -3.32438100 | 1.79251400  | -1.22797200 | H  | 6.68595500 | -1.33307900 | 2.63813200  |
| F | -3.83964000 | 0.47883500  | 1.68023700  | H  | 5.93039700 | -2.91039200 | 0.95764400  |
| F | -4.68220800 | -0.76661200 | 3.89036100  | N  | 4.52872400 | -2.26357100 | -1.27164100 |
| F | -3.31000300 | -2.91423900 | 4.88584900  | C  | 2.12615500 | -1.52241200 | -1.33899200 |
| F | -1.04841200 | -3.78372600 | 3.59901900  | H  | 1.39517800 | -1.17834900 | -2.07779100 |
| F | -0.18113200 | -2.55911200 | 1.39984300  | Si | 2.26569700 | -0.06538300 | -0.11125900 |
| F | -0.43913700 | 0.63882700  | -2.50207700 | C  | 2.07623700 | 1.65485600  | -0.81201000 |
| F | -3.67292700 | -2.13944500 | -0.37142300 | C  | 1.81797400 | 1.87610300  | -2.17822800 |
| F | -4.47503200 | -2.99942900 | -2.74750100 | C  | 2.25846200 | 2.77702000  | 0.02011700  |
| F | -3.30304300 | -2.08819500 | -5.04653000 | C  | 1.75160400 | 3.17111900  | -2.69321900 |
| F | -1.26327200 | -0.25589900 | -4.88028800 | H  | 1.63809900 | 1.04054200  | -2.84652500 |
| H | -0.16159600 | -0.35331200 | 0.05974800  | C  | 2.18890000 | 4.07148600  | -0.49332600 |
| C | 6.94747000  | -0.03707400 | 2.60938600  | H  | 2.43102700 | 2.64435200  | 1.08398300  |
| H | 6.48505500  | -0.33544300 | 3.55716100  | C  | 1.93843900 | 4.26980400  | -1.85289100 |
| H | 7.98233700  | -0.39620100 | 2.62829700  | H  | 1.53957200 | 3.32100300  | -3.74768600 |
| H | 6.97130100  | 1.05497500  | 2.57878400  | H  | 2.30896300 | 4.92259700  | 0.16949600  |
| C | 3.16395000  | -3.43899900 | -1.52550200 | H  | 1.87708900 | 5.27758800  | -2.25300400 |
| H | 3.52470700  | -4.01796100 | -0.67777100 | C  | 2.14074500 | -0.30481400 | 1.74011800  |
| H | 3.09898800  | -4.10622100 | -2.38832900 | H  | 3.11284000 | -0.22060100 | 2.23183300  |
| C | 1.80049500  | -2.72434000 | -1.24233900 | H  | 1.46396000 | 0.45235100  | 2.14322000  |
| H | 1.01074500  | -3.13129800 | -1.88012000 | H  | 1.70441600 | -1.27992300 | 1.96050200  |
| H | 1.46915300  | -2.86354000 | -0.21373800 | C  | 3.42741200 | -1.81905900 | -2.13071000 |

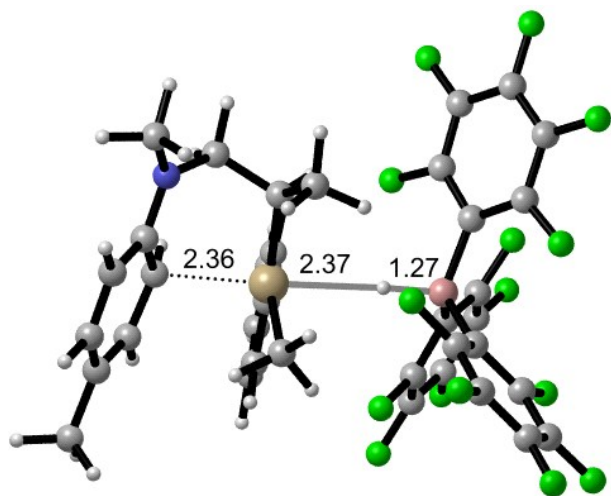

**TS''<sub>8</sub>**

**G<sub>gas</sub> = -3252.982412 a.u.**

**E<sub>gas</sub> = -3253.43695488 a.u.**

|   |            |             |             |   |             |             |             |
|---|------------|-------------|-------------|---|-------------|-------------|-------------|
| C | 4.95053400 | -1.41763400 | -0.29110300 | C | -2.82776700 | -2.21641900 | -0.80774800 |
| C | 4.61298200 | -0.02447000 | -0.35850800 | C | -1.71850100 | -2.04779200 | -3.32655100 |
| C | 5.14409000 | 0.87397600  | 0.61277400  | C | -3.20651800 | -3.13069400 | -1.79409700 |
| C | 5.86669500 | 0.43767900  | 1.70431100  | C | -2.64771800 | -3.05012300 | -3.06339900 |
| C | 6.12287200 | -0.95646300 | 1.78699900  | F | -0.22846800 | 2.08689200  | 1.56332500  |
| C | 5.69324500 | -1.86088300 | 0.83611800  | F | -0.55434100 | 4.69600400  | 1.08151700  |
| H | 4.40079500 | 0.39816500  | -1.33648100 | F | -2.20632000 | 5.53910600  | -0.94024900 |
| H | 4.94026700 | 1.93300200  | 0.48237700  | F | -3.50856500 | 3.68205000  | -2.47309200 |

|   |             |             |             |    |             |             |             |
|---|-------------|-------------|-------------|----|-------------|-------------|-------------|
| F | -3.19331500 | 1.08225100  | -2.02633000 | H  | -0.90505300 | 0.19518100  | -0.24713100 |
| F | -3.54013800 | 1.12953400  | 1.77336800  | H  | -2.44984500 | 1.75099900  | 1.31698300  |
| F | -4.18901000 | 0.49079600  | 4.26846300  | H  | -1.28682800 | 3.99687400  | -2.13023400 |
| F | -2.90912500 | -1.54647700 | 5.57368800  | H  | -1.54934800 | 2.02550800  | -3.55834200 |
| F | -0.93462500 | -2.94271400 | 4.27570500  | N  | -2.52971200 | -0.29672300 | -2.83812100 |
| F | -0.26767000 | -2.33329500 | 1.77232300  | C  | -1.64549800 | -2.60271700 | -1.69666000 |
| F | -0.48133300 | -0.19433300 | -2.64977400 | H  | -1.48585400 | -3.63948900 | -1.38640900 |
| F | -3.43885100 | -2.37412100 | 0.38376400  | H  | -0.89943500 | -2.01946800 | -1.15216600 |
| F | -4.10750700 | -4.08743900 | -1.52470400 | C  | -1.35248800 | -2.44893600 | -3.20333900 |
| F | -2.99399100 | -3.92309800 | -4.01943900 | H  | -2.02634700 | -3.09253100 | -3.78051400 |
| F | -1.16167800 | -1.94757100 | -4.54652400 | H  | -0.33618500 | -2.78961600 | -3.42746800 |
| H | -0.09228600 | -0.23476000 | 0.08122400  | C  | -1.50408800 | -0.97142900 | -3.66486100 |
| C | 6.38862700  | 1.37809300  | 2.76304500  | H  | -0.56286200 | -0.43340600 | -3.54424300 |
| H | 5.95705700  | 1.15404700  | 3.74540700  | H  | -1.78467400 | -0.93058000 | -4.72512700 |
| H | 7.47697800  | 1.30063300  | 2.86429500  | C  | -3.08829600 | -2.13581400 | -1.31580500 |
| H | 6.14829100  | 2.41700200  | 2.52345000  | H  | -3.75925900 | -2.99572700 | -1.20008700 |
| C | 4.88445300  | -3.67901900 | -1.23913000 | Si | -3.16541400 | -0.98460900 | 0.20628200  |
| H | 4.38465100  | -4.22340200 | -0.42733000 | C  | -4.96785400 | -0.56093500 | 0.59903700  |
| H | 4.59486400  | -4.13539100 | -2.18602000 | C  | -5.75808700 | -1.48607300 | 1.30982700  |
| H | 5.96628200  | -3.79571500 | -1.12707700 | C  | -5.58231000 | 0.63790000  | 0.19230200  |
| C | 1.58688500  | -2.81024500 | -0.68774800 | C  | -7.09929600 | -1.22983800 | 1.59619400  |
| H | 0.59324100  | -2.66004600 | -0.26948600 | H  | -5.32458300 | -2.42377900 | 1.65064100  |
| H | 1.52144800  | -3.61064800 | -1.43480900 | C  | -6.92381200 | 0.90177500  | 0.47761400  |
| H | 2.23219000  | -3.16542700 | 0.12296700  | H  | -5.00586300 | 1.38435900  | -0.34834900 |

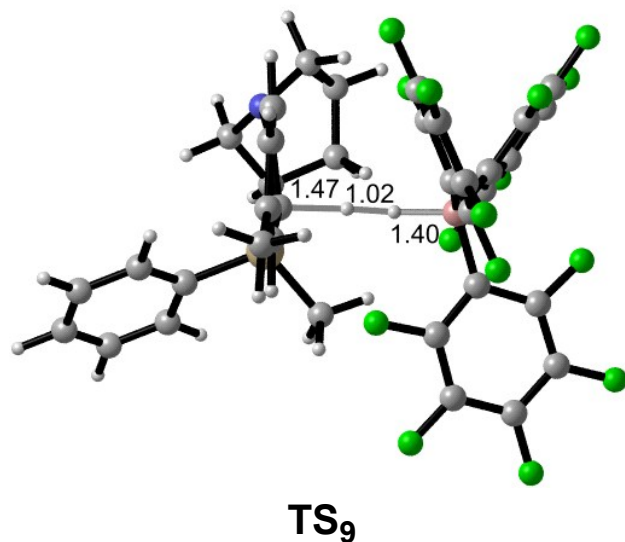

**G<sub>gas</sub> = -3291.052103 a.u.**

**E<sub>gas</sub> = -3291.50872757 a.u.**

|   |             |            |             |   |            |             |             |
|---|-------------|------------|-------------|---|------------|-------------|-------------|
| C | -2.18132400 | 0.72034900 | -1.96249500 | C | 2.97648500 | -3.52679400 | -1.99367600 |
| C | -2.29255400 | 0.58249500 | -0.51608900 | C | 1.54234900 | -0.20387400 | 1.85323200  |
| C | -2.25198500 | 1.80715000 | 0.25150300  | C | 0.57994200 | 0.21916600  | 2.76722100  |
| C | -1.89749300 | 3.02373600 | -0.29417000 | C | 2.65483600 | -0.82372200 | 2.43191600  |
| C | -1.59167000 | 3.05558400 | -1.67884100 | C | 0.66064800 | 0.01347200  | 4.14033500  |
| C | -1.71623300 | 1.94274400 | -2.48935300 | C | 2.78891200 | -1.04067700 | 3.80195900  |



|   |             |             |             |    |             |             |             |
|---|-------------|-------------|-------------|----|-------------|-------------|-------------|
| C | 1.77995400  | -0.62428800 | 4.66514300  | C  | 2.14573700  | 1.53644400  | 0.91668200  |
| C | 1.78637300  | 1.51350300  | -0.27697900 | C  | 2.18381800  | 2.11351200  | 2.17821600  |
| C | 1.55085800  | 1.86590200  | -1.60865600 | C  | 2.22889600  | 1.24904400  | 3.29032900  |
| C | 2.29300800  | 2.55114500  | 0.51223600  | C  | 2.25640800  | -0.13808700 | 3.15143600  |
| C | 1.75058500  | 3.13472400  | -2.13107400 | H  | 0.80023900  | -0.03367400 | 0.20755800  |
| C | 2.53032900  | 3.83984500  | 0.02625300  | H  | 2.10937400  | 2.17704100  | 0.04114900  |
| C | 2.24976800  | 4.13764700  | -1.30156000 | H  | 2.26203300  | 1.67940700  | 4.28877900  |
| F | 0.58634200  | -2.72384200 | 0.58089100  | H  | 2.33416600  | -0.76492000 | 4.03615500  |
| F | 1.44801900  | -4.85694400 | -0.76510900 | C  | 2.25002400  | -4.87098100 | 0.56664400  |
| F | 3.42025700  | -4.59994800 | -2.65648400 | H  | 3.20730300  | -5.10373400 | 1.05129300  |
| F | 4.48089500  | -2.13176800 | -3.16344200 | H  | 1.94192300  | -5.78366700 | 0.04515000  |
| F | 3.62946200  | 0.01125100  | -1.85282200 | C  | 1.19561200  | -4.48555200 | 1.63690800  |
| F | 3.68483000  | -1.23086100 | 1.66304200  | H  | 1.48424500  | -4.90947200 | 2.60606500  |
| F | 3.88030000  | -1.64199000 | 4.29419700  | H  | 0.22485600  | -4.92717000 | 1.38612900  |
| F | 1.88662700  | -0.83063100 | 5.98230800  | C  | 1.01228200  | -2.95938800 | 1.77430200  |
| F | -0.32561400 | 0.42438000  | 4.95199000  | H  | 0.33846500  | -2.59279500 | 0.99451100  |
| F | -0.52474200 | 0.87137300  | 2.32836600  | H  | 0.53346500  | -2.72224900 | 2.73093900  |
| F | 1.06755100  | 0.93531100  | -2.46537600 | Si | 3.03118100  | -0.83636900 | -0.69314100 |
| F | 2.59084300  | 2.36135300  | 1.81065500  | C  | 4.75649300  | -0.09346100 | -0.87142900 |
| F | 3.01886900  | 4.79100400  | 0.83384000  | C  | 5.22949900  | 0.39028300  | -2.10456500 |
| F | 2.45319200  | 5.36985600  | -1.78010600 | C  | 5.62294600  | -0.01363900 | 0.23649800  |
| F | 1.45068300  | 3.40940600  | -3.41086500 | C  | 6.51293800  | 0.92748300  | -2.22921100 |
| H | 0.05567800  | -0.03921000 | -0.01187500 | H  | 4.59233700  | 0.35091100  | -2.98383800 |
| C | -1.81452000 | 4.28256100  | 0.53424200  | C  | 6.90537600  | 0.52034300  | 0.11865000  |
| H | -2.45705100 | 5.07188200  | 0.12784200  | H  | 5.29251300  | -0.36946100 | 1.21036300  |
| H | -2.11800400 | 4.09859000  | 1.56771700  | C  | 7.35337300  | 0.99237100  | -1.11782000 |
| H | -0.79175200 | 4.67575400  | 0.55179800  | H  | 6.85451500  | 1.29425500  | -3.19311000 |
|   |             |             |             | H  | 7.55498100  | 0.56986200  | 0.98817700  |
|   |             |             |             | H  | 8.35213500  | 1.40912000  | -1.21259000 |
|   |             |             |             | C  | 2.16874300  | -0.86952300 | -2.36229600 |
|   |             |             |             | H  | 1.95598700  | 0.13661500  | -2.73358500 |
|   |             |             |             | H  | 2.79648000  | -1.38087500 | -3.10008500 |
|   |             |             |             | H  | 1.22496900  | -1.41176100 | -2.29880700 |
|   |             |             |             | C  | 3.05620700  | -2.48852300 | 0.27871500  |
|   |             |             |             | H  | 4.11410300  | -2.70004000 | 0.48504100  |
|   |             |             |             | C  | 2.16890600  | 3.61099800  | 2.36738400  |
|   |             |             |             | H  | 2.97641000  | 3.93919400  | 3.03041500  |
|   |             |             |             | H  | 2.28020600  | 4.13349700  | 1.41393900  |
|   |             |             |             | H  | 1.22475200  | 3.93729500  | 2.81848500  |
|   |             |             |             | C  | 2.47759000  | -3.73122700 | -0.43800400 |
|   |             |             |             | H  | 1.53123400  | -3.49896000 | -0.93784600 |
|   |             |             |             | H  | 3.16959300  | -4.05216400 | -1.22527900 |
|   |             |             |             | B  | -1.45805000 | 0.24002300  | -0.22785000 |
|   |             |             |             | C  | -2.08042900 | -0.47862400 | 1.07851300  |
|   |             |             |             | C  | -1.63588200 | -0.11716000 | 2.35531900  |
|   |             |             |             | C  | -3.04860700 | -1.48871800 | 1.06687000  |
|   |             |             |             | C  | -2.08764900 | -0.69909800 | 3.53377400  |

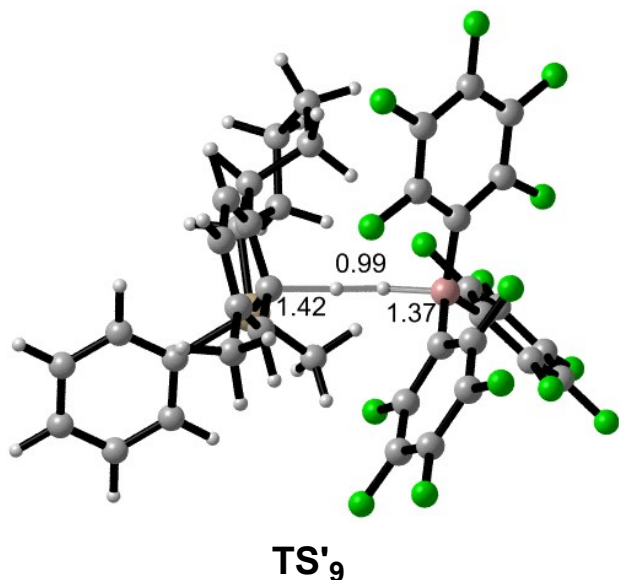

$G_{\text{gas}} = -3275.026807 \text{ a.u.}$

$E_{\text{gas}} = -3275.4920616 \text{ a.u.}$

|   |            |             |            |
|---|------------|-------------|------------|
| C | 2.22107500 | -0.72055600 | 1.88536300 |
| C | 2.11573600 | 0.11870800  | 0.72473900 |

|   |             |             |             |
|---|-------------|-------------|-------------|
| C | -3.53452500 | -2.09763000 | 2.22455800  |
| C | -3.04959100 | -1.70370200 | 3.46673200  |
| C | -1.41151100 | 1.85506900  | -0.20679300 |
| C | -2.31321700 | 2.66108000  | 0.49400400  |
| C | -0.45072200 | 2.55718900  | -0.93497300 |
| C | -2.25188500 | 4.05324900  | 0.49970500  |
| C | -0.33659500 | 3.94366300  | -0.94344800 |
| C | -1.25235600 | 4.70155300  | -0.22074600 |
| C | -1.82873700 | -0.40036200 | -1.66472100 |
| C | -1.39902900 | -1.67568900 | -2.03230500 |
| C | -2.61847600 | 0.24300900  | -2.62248300 |
| C | -1.67733300 | -2.27677900 | -3.25293300 |
| C | -2.93595400 | -0.32287800 | -3.85768500 |
| C | -2.46015100 | -1.58996200 | -4.17767700 |
| F | -3.58665100 | -1.92402800 | -0.08802100 |
| F | -4.46512100 | -3.05834600 | 2.14804500  |
| F | -3.50268900 | -2.28000800 | 4.58489800  |
| F | -1.61079200 | -0.30409700 | 4.72406200  |
| F | -0.70936900 | 0.85840500  | 2.48384900  |
| F | -0.63783000 | -2.39551800 | -1.16680800 |
| F | -1.20404800 | -3.49684200 | -3.54416500 |
| F | -2.74955400 | -2.14348300 | -5.35966300 |
| F | -3.69834300 | 0.34256100  | -4.73512300 |
| F | -3.13664200 | 1.46274600  | -2.38212600 |
| F | 0.46888000  | 1.87769400  | -1.66801400 |
| F | 0.65107400  | 4.54493800  | -1.62513100 |
| F | -1.17005600 | 6.03652100  | -0.21392000 |
| F | -3.14459600 | 4.77341600  | 1.19165000  |
| F | -3.31447700 | 2.10761600  | 1.20367300  |
| H | -0.13296100 | -0.10092500 | -0.10396600 |
| C | 2.36423100  | -2.21516200 | 1.66641100  |
| H | 3.00286000  | -2.60424000 | 2.47134500  |

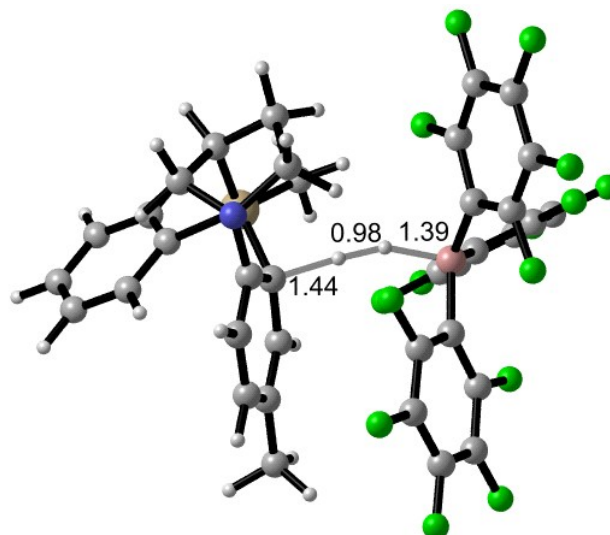

**TS''<sub>9</sub>**

**G<sub>gas</sub> = -3251.765422 a.u.**

**E<sub>gas</sub> = -3252.19287918 a.u.**

|    |             |             |             |
|----|-------------|-------------|-------------|
| C  | -2.21541500 | 1.16956400  | -1.80088900 |
| C  | -2.14544900 | 0.40085300  | -0.57961800 |
| C  | -2.39012500 | 1.11250000  | 0.64371900  |
| C  | -2.62699100 | 2.48025400  | 0.69798800  |
| C  | -2.63826500 | 3.18685300  | -0.51948200 |
| C  | -2.43997800 | 2.54459500  | -1.74046700 |
| H  | -0.78062100 | 0.00432500  | -0.36136300 |
| H  | -2.36295800 | 0.55540100  | 1.57408700  |
| H  | -2.80734600 | 4.26110100  | -0.50881500 |
| H  | -2.46766800 | 3.09793600  | -2.67287100 |
| N  | -2.13416600 | 0.58449700  | -3.10971300 |
| C  | -1.28734800 | -1.72418400 | -3.16401500 |
| H  | -1.25993300 | -2.25109300 | -4.12455500 |
| H  | -0.59157400 | -2.23987000 | -2.50023300 |
| C  | -0.90858700 | -0.22239800 | -3.36838300 |
| H  | -0.09671100 | 0.11457600  | -2.72298300 |
| H  | -0.59624900 | -0.04027600 | -4.40185100 |
| C  | -2.74387800 | -1.66812100 | -2.63626600 |
| H  | -3.32603300 | -2.55146800 | -2.92471000 |
| Si | -2.84879000 | -1.41648700 | -0.75055700 |
| C  | -4.64974700 | -1.37909800 | -0.17811600 |
| C  | -5.25638500 | -2.55350300 | 0.30794200  |
| C  | -5.44970100 | -0.22354400 | -0.26532800 |
| C  | -6.60085900 | -2.57624400 | 0.68294000  |
| H  | -4.67525300 | -3.46715900 | 0.40306100  |
| C  | -6.79435300 | -0.24025300 | 0.10754400  |
| H  | -5.01809800 | 0.70944400  | -0.61853800 |
| C  | -7.37347300 | -1.41852200 | 0.58228300  |
| H  | -7.04228900 | -3.49557000 | 1.05742200  |
| H  | -7.38843100 | 0.66628700  | 0.03170100  |

|   |             |             |             |
|---|-------------|-------------|-------------|
| H | -8.41927000 | -1.43296800 | 0.87583400  |
| C | -1.89584200 | -2.71230300 | 0.22376600  |
| H | -0.83426100 | -2.71473800 | -0.03232500 |
| H | -1.98654100 | -2.55264200 | 1.30112400  |
| H | -2.29101100 | -3.70849800 | -0.00484800 |
| C | -3.24271000 | -0.37697100 | -3.32340900 |
| H | -4.18422900 | 0.02457200  | -2.93863800 |
| H | -3.36406500 | -0.52729200 | -4.40451300 |
| B | 1.44857200  | 0.04809400  | 0.29513400  |
| C | 2.32241900  | -0.31528600 | -1.01583300 |
| C | 3.29208200  | 0.50963300  | -1.59479800 |
| C | 2.17420800  | -1.55819200 | -1.63736900 |
| C | 4.03544000  | 0.14587700  | -2.71688400 |
| C | 2.88364800  | -1.96080600 | -2.76297400 |
| C | 3.82960400  | -1.09678400 | -3.30771100 |
| C | 1.61300700  | -1.01469700 | 1.50357900  |
| C | 0.57789000  | -1.31566300 | 2.38736500  |
| C | 2.80872600  | -1.69313100 | 1.76082800  |
| C | 0.67286600  | -2.24076700 | 3.41989300  |
| C | 2.95872200  | -2.61857100 | 2.79297600  |
| C | 1.88076400  | -2.90074300 | 3.62618700  |
| C | 1.32645500  | 1.60313600  | 0.70490400  |
| C | 0.94088200  | 2.55487000  | -0.24515500 |
| C | 1.52650200  | 2.11510300  | 1.99137800  |
| C | 0.73557500  | 3.89854500  | 0.03531900  |
| C | 1.34564600  | 3.46068500  | 2.31694000  |
| C | 0.93937800  | 4.35686500  | 1.33532000  |
| F | 1.27828300  | -2.45108900 | -1.14479100 |
| F | 2.66978700  | -3.16209200 | -3.31766500 |
| F | 4.53091900  | -1.45742500 | -4.38700200 |
| F | 4.95018000  | 0.98057700  | -3.22697700 |
| F | 3.57186000  | 1.71731400  | -1.07031900 |
| F | 3.90322900  | -1.46002200 | 1.01076300  |
| F | 4.13085500  | -3.23593900 | 2.98932700  |
| F | 2.00381600  | -3.79196600 | 4.61505700  |
| F | -0.38177000 | -2.49833900 | 4.20761600  |
| F | -0.61862100 | -0.68935500 | 2.25514100  |
| F | 0.72249300  | 2.16939100  | -1.52279600 |
| F | 1.92006200  | 1.32107900  | 3.00391600  |
| F | 1.54946400  | 3.89135500  | 3.56910900  |
| F | 0.73724800  | 5.64484700  | 1.63531200  |
| F | 0.32810000  | 4.74936800  | -0.91865000 |
| H | 0.16256100  | -0.21135800 | -0.17693900 |
| C | -2.86560500 | 3.19502300  | 2.00661800  |
| H | -2.13696900 | 3.99886600  | 2.15742900  |
| H | -3.86098600 | 3.65270700  | 2.03123500  |
| H | -2.79044500 | 2.50980000  | 2.85430400  |

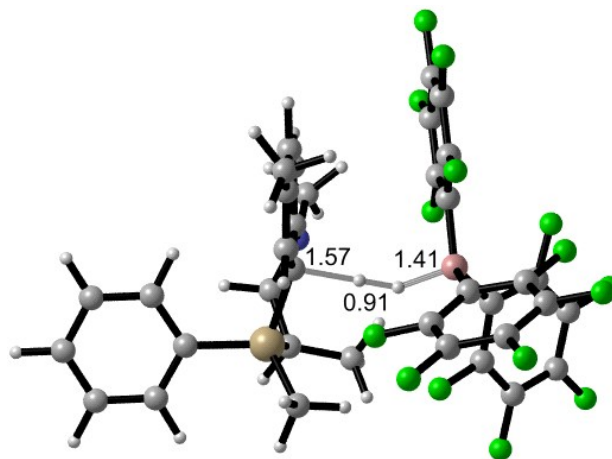

**TS''<sub>9</sub>**

**G<sub>gas</sub> = -3252.975098 a.u.**

**E<sub>gas</sub> = -3253.4231059 a.u.**

|    |             |             |             |
|----|-------------|-------------|-------------|
| C  | -2.41347700 | 1.38125100  | -0.72261900 |
| C  | -2.33169400 | 0.29260700  | 0.23726000  |
| C  | -2.16233700 | 0.63801200  | 1.62086300  |
| C  | -1.94728000 | 1.92523400  | 2.07386700  |
| C  | -1.99605600 | 2.95271100  | 1.10537700  |
| C  | -2.21667000 | 2.70218600  | -0.23593900 |
| H  | -0.82955900 | -0.12250400 | 0.05691300  |
| H  | -2.13365100 | -0.17612300 | 2.33893100  |
| H  | -1.86855600 | 3.98493000  | 1.42421600  |
| H  | -2.27901600 | 3.54408400  | -0.91292200 |
| N  | -2.63851100 | 1.16660200  | -2.06444200 |
| C  | -3.06681200 | -1.34339100 | -2.09563300 |
| H  | -3.83405400 | -2.03197500 | -2.47694700 |
| Si | -3.18238500 | -1.35776400 | -0.19884000 |
| C  | -5.00553800 | -1.23801100 | 0.30225900  |
| C  | -5.82789100 | -2.38004500 | 0.22967500  |
| C  | -5.60195200 | -0.03617200 | 0.72613200  |
| C  | -7.18252800 | -2.32469000 | 0.55894700  |
| H  | -5.40908300 | -3.33325600 | -0.08624600 |
| C  | -6.95695600 | 0.02579100  | 1.05928800  |
| H  | -5.00090900 | 0.86587800  | 0.80645900  |
| C  | -7.75050700 | -1.11882600 | 0.97542700  |
| H  | -7.79309900 | -3.22113200 | 0.49443200  |
| H  | -7.39113300 | 0.96645800  | 1.38695300  |
| H  | -8.80435900 | -1.07325500 | 1.23541700  |
| C  | -2.42045700 | -2.87823800 | 0.60297300  |
| H  | -1.37438300 | -3.01173400 | 0.32667800  |
| H  | -2.47679500 | -2.82688900 | 1.69405600  |
| H  | -2.97282700 | -3.77075900 | 0.28789200  |
| C  | -3.49657200 | 0.06035000  | -2.54996900 |
| H  | -4.53899900 | 0.25329000  | -2.25432300 |
| H  | -3.46368100 | 0.11168600  | -3.64289300 |

|   |             |             |             |
|---|-------------|-------------|-------------|
| B | 1.41323900  | -0.03501600 | 0.05393500  |
| C | 1.38081000  | 1.57178500  | -0.02045100 |
| C | 1.67117800  | 2.42949400  | 1.04686900  |
| C | 0.99446900  | 2.22480000  | -1.19609700 |
| C | 1.61856000  | 3.81935200  | 0.95279400  |
| C | 0.92891200  | 3.60565600  | -1.33309700 |
| C | 1.24430000  | 4.41522300  | -0.24724100 |
| C | 1.98612000  | -0.84341300 | -1.22449900 |
| C | 1.60703200  | -2.16811300 | -1.45344800 |
| C | 2.95058100  | -0.35024800 | -2.10936000 |
| C | 2.09157400  | -2.94792000 | -2.49832000 |
| C | 3.47476900  | -1.09915700 | -3.16138600 |
| C | 3.04058700  | -2.40653200 | -3.36036800 |
| C | 1.92355100  | -0.71853500 | 1.42777300  |
| C | 1.15945700  | -1.43013100 | 2.34667800  |
| C | 3.29022700  | -0.65983800 | 1.71612200  |
| C | 1.69317400  | -2.04072500 | 3.48100400  |
| C | 3.86829800  | -1.24977300 | 2.83459900  |
| C | 3.05863200  | -1.95048800 | 3.72639500  |
| F | 0.62008700  | 1.50282200  | -2.27486700 |
| F | 0.50909800  | 4.15947600  | -2.48482300 |
| F | 1.17048700  | 5.74590900  | -0.35010000 |
| F | 1.90725000  | 4.58450400  | 2.01440200  |
| F | 1.99839300  | 1.94711900  | 2.26160600  |
| F | 3.43014400  | 0.89937800  | -1.97430700 |
| F | 4.39507400  | -0.57294800 | -3.98024100 |
| F | 3.52894700  | -3.13429500 | -4.36993500 |
| F | 1.65618300  | -4.20330700 | -2.67635000 |
| F | 0.70026100  | -2.75379900 | -0.63629900 |
| F | -0.17677300 | -1.56193000 | 2.17323100  |
| F | 4.10759900  | 0.01594800  | 0.88181900  |
| F | 5.18459700  | -1.15255000 | 3.06217500  |
| F | 3.59036200  | -2.52780300 | 4.80947500  |
| F | 0.90139300  | -2.71095800 | 4.33081500  |
| H | 0.04589800  | -0.36401200 | -0.03014000 |
| C | -1.63612200 | 2.23372200  | 3.51780100  |
| H | -1.90018000 | 1.39708200  | 4.17019000  |
| H | -0.56442700 | 2.42898700  | 3.64808100  |
| H | -2.17498800 | 3.12059000  | 3.86770200  |
| C | -2.51597600 | 2.28826600  | -2.99353200 |
| H | -1.58277800 | 2.82720000  | -2.82839900 |
| H | -2.48979300 | 1.89410700  | -4.01060500 |
| H | -3.35640000 | 2.99539400  | -2.92404400 |
| C | -1.70385000 | -1.73236600 | -2.69293400 |
| H | -1.35403000 | -2.70294600 | -2.33185000 |
| H | -1.76277000 | -1.78594700 | -3.78750200 |
| H | -0.93888800 | -0.98867100 | -2.44956200 |

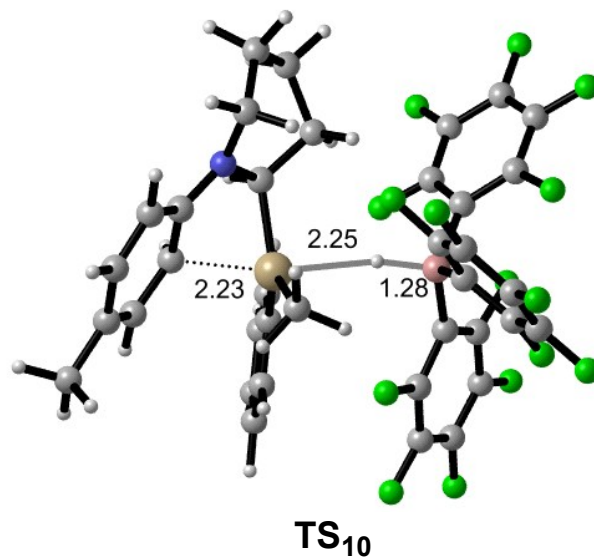

**G<sub>gas</sub> = -3291.074685 a.u.**

**E<sub>gas</sub> = -3291.53724174 a.u.**

|    |             |             |             |
|----|-------------|-------------|-------------|
| C  | -4.48804600 | -1.08451500 | 0.69859700  |
| C  | -5.53163800 | -1.50715600 | -0.16877200 |
| C  | -6.33588400 | -0.56896800 | -0.77613700 |
| C  | -6.20149300 | 0.83739500  | -0.57104500 |
| C  | -5.24580900 | 1.24997100  | 0.32570700  |
| C  | -4.34681400 | 0.33269600  | 0.96760300  |
| H  | -5.67862400 | -2.55719700 | -0.39021100 |
| H  | -7.10852500 | -0.91933800 | -1.45711200 |
| H  | -5.15391100 | 2.30358200  | 0.57763400  |
| H  | -4.06520100 | 0.61860000  | 1.98136000  |
| N  | -3.50691700 | -1.87790800 | 1.18281800  |
| C  | -1.73016000 | -3.30084000 | 2.87559900  |
| H  | -0.90826400 | -3.97533500 | 3.13362100  |
| H  | -2.11748400 | -2.91024500 | 3.82432500  |
| C  | -1.19114700 | -2.12577900 | 2.04328900  |
| H  | -0.69271700 | -2.48225800 | 1.14127900  |
| H  | -0.44835300 | -1.57352000 | 2.61638000  |
| C  | -2.32724900 | -1.15724200 | 1.71204200  |
| H  | -2.61570600 | -0.67565600 | 2.66187000  |
| Si | -2.17153800 | 0.36154600  | 0.46954100  |
| C  | -1.71273100 | 2.03365600  | 1.15825300  |
| C  | -1.23689300 | 2.18965800  | 2.47390400  |
| C  | -1.92139100 | 3.19130300  | 0.38304300  |
| C  | -0.98206000 | 3.45783300  | 2.99610400  |
| H  | -1.03214300 | 1.32029600  | 3.09040500  |
| C  | -1.66300000 | 4.45894200  | 0.90404900  |
| H  | -2.26044100 | 3.10666700  | -0.64492500 |
| C  | -1.19549200 | 4.59369500  | 2.21293300  |
| H  | -0.60425400 | 3.55726700  | 4.00943000  |
| H  | -1.81073700 | 5.33731100  | 0.28303500  |

|   |             |             |             |
|---|-------------|-------------|-------------|
| H | -0.98815400 | 5.58011900  | 2.61756200  |
| C | -2.35696700 | 0.12796000  | -1.38182800 |
| H | -3.12726700 | 0.81413000  | -1.74713700 |
| H | -1.42791100 | 0.32716700  | -1.90999400 |
| H | -2.67865500 | -0.89213600 | -1.60207300 |
| B | 1.22733500  | -0.09318300 | -0.27593000 |
| C | 2.04011200  | -1.04014500 | 0.78510500  |
| C | 1.90613300  | -0.84469800 | 2.16034200  |
| C | 2.93322800  | -2.05958100 | 0.44368000  |
| C | 2.54954200  | -1.59840000 | 3.13401400  |
| C | 3.61115500  | -2.84066300 | 1.38200200  |
| C | 3.41832900  | -2.61154400 | 2.73890200  |
| C | 1.12799500  | -0.76751600 | -1.76753500 |
| C | 1.91916700  | -0.39029200 | -2.85771900 |
| C | 0.25354500  | -1.81787900 | -2.04459200 |
| C | 1.83079600  | -0.97748800 | -4.11919800 |
| C | 0.12188800  | -2.43462300 | -3.28470100 |
| C | 0.92347100  | -2.00924700 | -4.33786800 |
| C | 1.75949900  | 1.45896100  | -0.29827900 |
| C | 2.89303100  | 1.95182800  | 0.35715500  |
| C | 1.05880700  | 2.43500300  | -1.00936900 |
| C | 3.27397900  | 3.29460800  | 0.34459700  |
| C | 1.38810800  | 3.78449300  | -1.04357100 |
| C | 2.51421300  | 4.22295600  | -0.35624000 |
| F | 3.20309100  | -2.34655200 | -0.84666000 |
| F | 4.44995200  | -3.80885800 | 0.98354300  |
| F | 4.05380500  | -3.35597400 | 3.65361000  |
| F | 2.33629700  | -1.36428000 | 4.44007200  |
| F | 1.07702400  | 0.13089500  | 2.61930300  |
| F | -0.56679700 | -2.30201400 | -1.06571800 |
| F | -0.76635100 | -3.42715600 | -3.46840300 |
| F | 0.82211600  | -2.58344100 | -5.54372600 |
| F | 2.61761700  | -0.56296400 | -5.12259800 |
| F | 2.84602800  | 0.57879700  | -2.72864100 |
| F | 3.71261400  | 1.13549900  | 1.05213900  |
| F | -0.04183100 | 2.08518100  | -1.72629000 |
| F | 0.62636700  | 4.66150300  | -1.72077300 |
| F | 2.85768600  | 5.51834300  | -0.36785500 |
| F | 4.37116600  | 3.69616400  | 1.00481600  |
| H | 0.02316000  | -0.03011400 | 0.15675800  |
| C | -7.11688500 | 1.79749600  | -1.29014800 |
| H | -6.97482800 | 1.74704600  | -2.37609000 |
| H | -8.17065800 | 1.56980700  | -1.09296600 |
| H | -6.93281200 | 2.82876600  | -0.97836500 |
| C | -2.85318900 | -4.07051300 | 2.13390300  |
| H | -3.69347700 | -4.25617700 | 2.81068000  |
| H | -2.50018100 | -5.05020100 | 1.79532100  |

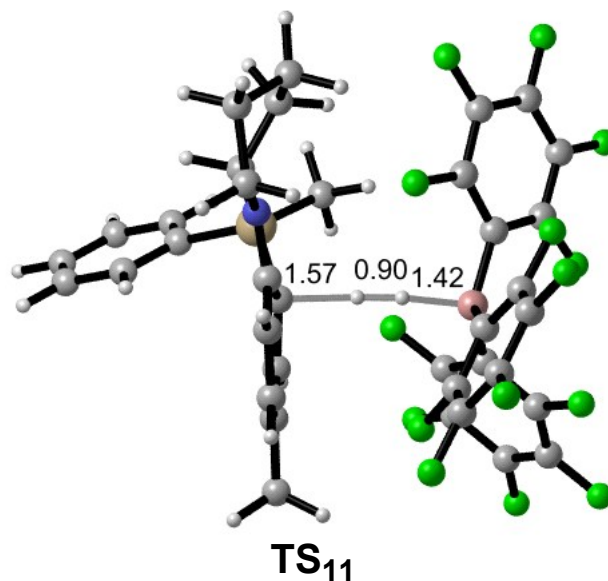

**G<sub>gas</sub> = -3291.080896 a.u.**

**E<sub>gas</sub> = -3291.53478863 a.u.**

|    |            |             |             |
|----|------------|-------------|-------------|
| C  | 2.04948000 | 0.61664700  | -1.89701900 |
| C  | 2.04288700 | -0.53337200 | -1.02299700 |
| C  | 1.66955900 | -1.79898300 | -1.57761100 |
| C  | 1.13567100 | -1.91782800 | -2.84528400 |
| C  | 1.00597300 | -0.73010000 | -3.61165700 |
| C  | 1.44179000 | 0.50678400  | -3.17413600 |
| H  | 0.62068300 | -0.28445600 | -0.39720000 |
| H  | 1.73974100 | -2.67835200 | -0.94279100 |
| H  | 0.54960400 | -0.79736900 | -4.59695500 |
| H  | 1.35678700 | 1.36909200  | -3.82523800 |
| N  | 2.64494500 | 1.74640500  | -1.43429000 |
| C  | 2.91596500 | 4.11828900  | 0.02722300  |
| H  | 3.34520500 | 4.97570500  | 0.55546600  |
| H  | 1.82866200 | 4.24183700  | 0.06024200  |
| C  | 3.37174400 | 4.10730400  | -1.43574000 |
| H  | 4.45926900 | 3.97550000  | -1.49361800 |
| H  | 3.14848500 | 5.06102700  | -1.92501300 |
| C  | 2.66191600 | 2.98987500  | -2.21158700 |
| H  | 1.62401900 | 3.28882800  | -2.40991100 |
| H  | 3.14730300 | 2.82682600  | -3.18602300 |
| Si | 3.23784000 | -0.16444200 | 0.40025500  |
| C  | 4.80835400 | -1.19709300 | 0.27307600  |
| C  | 5.40684400 | -1.77879300 | 1.40532600  |
| C  | 5.43459500 | -1.39653300 | -0.97296900 |
| C  | 6.58352000 | -2.52399200 | 1.30113500  |
| H  | 4.95193600 | -1.65457900 | 2.38440600  |

|   |             |             |             |
|---|-------------|-------------|-------------|
| C | 6.61010000  | -2.13833300 | -1.08312300 |
| H | 4.99463700  | -0.97386300 | -1.87373400 |
| C | 7.18750800  | -2.70388600 | 0.05648700  |
| H | 7.02573200  | -2.96450600 | 2.19035400  |
| H | 7.07366000  | -2.27957300 | -2.05556000 |
| H | 8.10206100  | -3.28427100 | -0.02705200 |
| C | 2.54458700  | -0.23683600 | 2.14738200  |
| H | 2.32372300  | -1.26684100 | 2.44057800  |
| H | 3.25838300  | 0.17759800  | 2.86752300  |
| H | 1.61482900  | 0.33082200  | 2.23162500  |
| C | 3.52303600  | 1.63529100  | -0.24502500 |
| H | 4.56085200  | 1.70124500  | -0.60684700 |
| C | 0.65705100  | -3.23592300 | -3.40190800 |
| H | 1.11602500  | -3.45612300 | -4.37250500 |
| H | 0.89339700  | -4.06131900 | -2.72499300 |
| H | -0.42878100 | -3.22243600 | -3.54884200 |
| C | 3.29558100  | 2.79918500  | 0.74708100  |
| H | 2.51773100  | 2.56184300  | 1.47553600  |
| H | 4.22455300  | 2.92799600  | 1.31505300  |
| B | -1.55328400 | -0.02350900 | 0.34370200  |
| C | -2.24143800 | 0.64419400  | -0.95036200 |
| C | -2.25797600 | -0.03775100 | -2.17288600 |
| C | -2.83615100 | 1.91111900  | -0.98717800 |
| C | -2.78146200 | 0.48451400  | -3.34985500 |
| C | -3.38844700 | 2.46653500  | -2.14100700 |
| C | -3.35733500 | 1.75143400  | -3.33345000 |
| C | -1.93650200 | -1.56231200 | 0.63105000  |
| C | -3.24202000 | -2.03672800 | 0.47597100  |
| C | -1.01754000 | -2.51168900 | 1.07695800  |
| C | -3.61352100 | -3.35521900 | 0.72516000  |
| C | -1.34031200 | -3.84213600 | 1.33028500  |
| C | -2.65301700 | -4.26740600 | 1.15395500  |
| C | -1.33312700 | 0.90677600  | 1.63905100  |
| C | -0.51678300 | 2.03930600  | 1.57854400  |
| C | -1.92191300 | 0.67491600  | 2.88551000  |
| C | -0.26881700 | 2.87662800  | 2.65817200  |
| C | -1.70899500 | 1.49546500  | 3.99455000  |
| C | -0.87239200 | 2.60084700  | 3.88305400  |
| F | -2.92059700 | 2.67180200  | 0.12083200  |
| F | -3.94651200 | 3.68445800  | -2.10982000 |
| F | -3.87296000 | 2.27452500  | -4.45060800 |
| F | -2.73167600 | -0.21758300 | -4.49235000 |
| F | -1.72132700 | -1.27297400 | -2.25784500 |
| F | 0.09126100  | 2.35395500  | 0.40981300  |
| F | 0.55123700  | 3.93440400  | 2.53492800  |
| F | -0.64988600 | 3.39180400  | 4.93724300  |
| F | -2.30216900 | 1.22585900  | 5.16432100  |

|   |             |             |             |
|---|-------------|-------------|-------------|
| F | -2.75547400 | -0.36456200 | 3.07124000  |
| F | 0.27870500  | -2.16408100 | 1.27431800  |
| F | -0.40236600 | -4.70827300 | 1.74150000  |
| F | -2.98911000 | -5.53916000 | 1.39547600  |
| F | -4.88227900 | -3.75210000 | 0.56087000  |
| F | -4.22042400 | -1.19851000 | 0.08192000  |
| H | -0.21475700 | -0.11698600 | -0.11013800 |

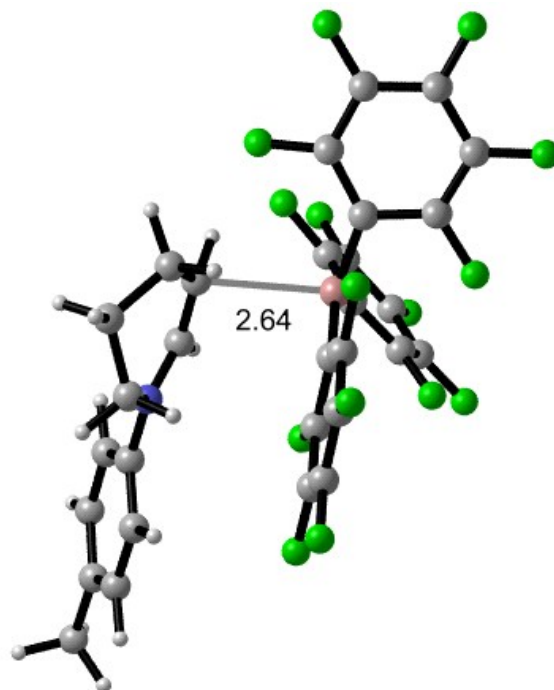

**TS<sub>12</sub>**

**G<sub>gas</sub> = -2728.943167 a.u.**

**E<sub>gas</sub> = -2729.26530460 a.u.**

|   |             |             |             |
|---|-------------|-------------|-------------|
| C | -3.90013600 | -0.14998000 | 1.32254200  |
| C | -4.31506600 | 1.09208100  | 1.82415300  |
| C | -5.55892500 | 1.61172100  | 1.47308500  |
| C | -6.43825000 | 0.90882900  | 0.63980200  |
| C | -6.01682200 | -0.33698000 | 0.15747500  |
| C | -4.76955600 | -0.86297800 | 0.48527600  |
| H | -3.67801200 | 1.64247200  | 2.50893400  |
| H | -5.85772400 | 2.57735600  | 1.87317500  |
| H | -6.66844900 | -0.90293700 | -0.50338900 |
| H | -4.45903200 | -1.80836700 | 0.05514500  |
| N | -2.62927700 | -0.68798400 | 1.66331400  |
| C | -1.53715100 | 0.11395500  | 1.83206700  |
| H | -1.70157000 | 1.15891700  | 1.59743300  |
| C | -0.30016500 | -0.32651200 | 2.21210400  |
| H | 0.42372000  | 0.42723200  | 2.47880800  |
| C | -0.10510800 | -1.75091900 | 2.68571600  |
| H | 0.54883600  | -1.75901300 | 3.56305800  |
| H | 0.40703500  | -2.35916600 | 1.92858300  |
| C | -1.46016000 | -2.38606500 | 3.03170300  |

|   |             |             |             |
|---|-------------|-------------|-------------|
| H | -1.83774700 | -1.96091100 | 3.96888400  |
| H | -1.36268800 | -3.46630300 | 3.18069100  |
| C | -2.49283900 | -2.13225600 | 1.92789000  |
| H | -2.19884200 | -2.65604700 | 1.00920600  |
| H | -3.47459600 | -2.51033200 | 2.22295400  |
| B | 1.00793900  | 0.00452800  | -0.05373100 |
| C | 0.78020500  | 1.55267200  | -0.37033800 |
| C | 0.46249100  | 2.01293400  | -1.65630600 |
| C | 1.07016400  | 2.56139800  | 0.55717800  |
| C | 0.37976800  | 3.36351000  | -1.98613100 |
| C | 0.98460400  | 3.92072900  | 0.27219900  |
| C | 0.63550000  | 4.32524300  | -1.01331900 |
| C | 0.13455800  | -1.12713200 | -0.72512400 |
| C | 0.57552500  | -2.45652100 | -0.85697500 |
| C | -1.16024000 | -0.89582400 | -1.22735800 |
| C | -0.17811300 | -3.46520500 | -1.45219200 |
| C | -1.94056900 | -1.87641700 | -1.82769800 |
| C | -1.44706100 | -3.17420400 | -1.94240200 |
| C | 2.54309800  | -0.29607100 | 0.33363800  |
| C | 3.19062000  | -0.36936200 | 1.56633200  |
| C | 3.38806700  | -0.40332400 | -0.77878300 |
| C | 4.56884800  | -0.55507900 | 1.69123500  |
| C | 4.76272100  | -0.58627500 | -0.70046100 |
| C | 5.36092800  | -0.66460900 | 0.55484700  |
| F | 1.45238600  | 2.23884400  | 1.81163700  |
| F | 1.24727200  | 4.83485000  | 1.21424200  |
| F | 0.55515100  | 5.62394200  | -1.31139900 |
| F | 0.06805000  | 3.74221600  | -3.23096600 |
| F | 0.24782400  | 1.14457200  | -2.65864300 |
| F | -1.72689500 | 0.31695000  | -1.11478100 |
| F | -3.17240900 | -1.59498100 | -2.27468700 |
| F | -2.18605300 | -4.12677100 | -2.51409600 |
| F | 0.30549400  | -4.70909500 | -1.55000700 |
| F | 1.77661100  | -2.83825700 | -0.38655500 |
| F | 2.51553400  | -0.27146900 | 2.72942100  |
| F | 2.84538000  | -0.32554200 | -2.01429600 |
| F | 5.50771800  | -0.68447000 | -1.80792900 |
| F | 6.68088000  | -0.84056900 | 0.66421500  |
| F | 5.13071100  | -0.62532800 | 2.90478700  |
| C | -7.80198400 | 1.45931900  | 0.29708500  |
| H | -7.81094900 | 2.55286800  | 0.32577700  |
| H | -8.12040900 | 1.14490100  | -0.70147500 |
| H | -8.56290500 | 1.10848600  | 1.00573100  |

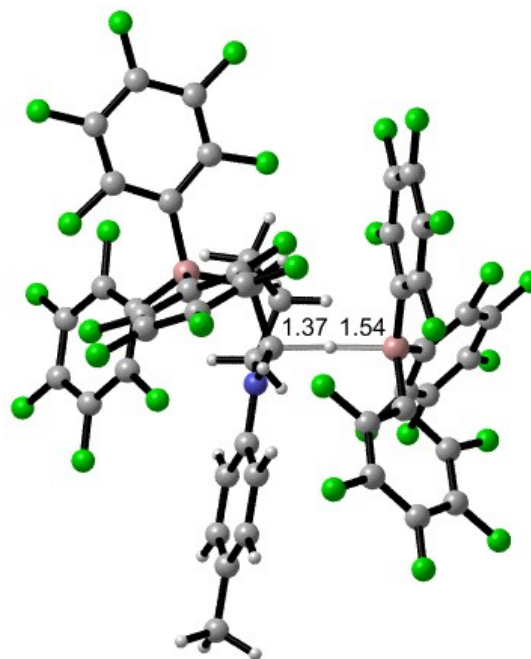

**TS<sub>13</sub>**

**G<sub>gas</sub> = -4937.726345 a.u.**

**E<sub>gas</sub> = -4938.17618497 a.u.**

|   |             |             |             |
|---|-------------|-------------|-------------|
| C | -1.19259100 | 2.99083700  | -0.57091500 |
| C | -1.52055600 | 3.03101100  | 0.79755400  |
| C | -2.06242100 | 4.17390600  | 1.36941400  |
| C | -2.30451300 | 5.33556000  | 0.62249300  |
| C | -1.96991400 | 5.29620300  | -0.73124700 |
| C | -1.42719500 | 4.15519500  | -1.32341800 |
| H | -1.34592000 | 2.17597400  | 1.43259300  |
| H | -2.30142900 | 4.15831700  | 2.43044900  |
| H | -2.12992700 | 6.17672800  | -1.34920300 |
| H | -1.17603300 | 4.19558700  | -2.37484700 |
| N | -0.62648400 | 1.84721600  | -1.18565800 |
| C | -0.26725900 | 0.70420900  | -0.48422500 |
| H | -0.19600800 | 0.88546800  | 0.58014700  |
| C | 0.89092000  | -0.13788200 | -1.00752100 |
| H | 0.68891800  | -1.14903800 | -0.67297500 |
| C | 0.96777700  | -0.14390000 | -2.55754000 |
| H | 1.13056200  | -1.16482400 | -2.90520100 |
| H | 1.82324800  | 0.44093900  | -2.90708600 |
| C | -0.29665900 | 0.42571600  | -3.19763000 |
| H | -1.14775500 | -0.23406500 | -3.00724500 |
| H | -0.18851100 | 0.49927300  | -4.28640800 |
| C | -0.59092300 | 1.82036100  | -2.65923100 |
| H | 0.17969800  | 2.52144500  | -3.00849600 |
| H | -1.55797100 | 2.17727000  | -3.03036000 |
| B | 2.38666500  | 0.26636000  | -0.27991600 |
| C | 2.37867400  | 0.06265500  | 1.38468600  |
| C | 3.03834700  | 0.88085700  | 2.31415800  |

|   |             |             |             |   |             |             |             |
|---|-------------|-------------|-------------|---|-------------|-------------|-------------|
| C | 1.81440400  | -1.07693200 | 1.97114700  | C | -4.91616200 | -0.79188000 | -3.84359600 |
| C | 3.06242800  | 0.64271200  | 3.68836700  | C | -3.23050200 | -0.36600800 | 1.19045800  |
| C | 1.80300800  | -1.35426800 | 3.33605300  | C | -2.51523500 | 0.06315400  | 2.31303700  |
| C | 2.43317700  | -0.48019000 | 4.21107700  | C | -4.61204900 | -0.15930600 | 1.28469900  |
| C | 2.72096600  | 1.82373300  | -0.75860100 | C | -3.08357800 | 0.68602400  | 3.41674300  |
| C | 3.47091500  | 2.15967900  | -1.89044400 | C | -5.22949400 | 0.45203100  | 2.37625200  |
| C | 2.17429100  | 2.93784200  | -0.11339400 | C | -4.46099300 | 0.88453700  | 3.44863400  |
| C | 3.68066500  | 3.46378400  | -2.33878000 | F | -0.94969800 | -2.54503000 | -2.04679400 |
| C | 2.35183100  | 4.25814000  | -0.51695300 | F | 0.42190000  | -4.79462800 | -1.65706400 |
| C | 3.11955600  | 4.52711700  | -1.64421300 | F | 0.45224400  | -5.99360800 | 0.80376600  |
| C | 3.59442500  | -0.80524800 | -0.72859400 | F | -0.96571200 | -4.88272100 | 2.85906100  |
| C | 3.42871700  | -2.11069100 | -1.20101400 | F | -2.36838200 | -2.67483100 | 2.50613400  |
| C | 4.93630600  | -0.47440700 | -0.48757200 | F | -3.60894400 | -3.37765600 | -1.71055100 |
| C | 4.47948400  | -2.99635200 | -1.45258700 | F | -4.99906400 | -3.15062900 | -3.95715200 |
| C | 6.01574300  | -1.31964500 | -0.72228000 | F | -5.62871900 | -0.69084700 | -4.97417800 |
| C | 5.78690200  | -2.60022900 | -1.21305900 | F | -4.81920200 | 1.56587200  | -3.64101900 |
| F | 1.24519800  | -2.03703100 | 1.20165900  | F | -3.44763600 | 1.36246300  | -1.36122200 |
| F | 1.20810100  | -2.46662200 | 3.80154000  | F | -1.17391200 | -0.10722900 | 2.35854700  |
| F | 2.44812700  | -0.72092300 | 5.53184000  | F | -5.44981400 | -0.57214700 | 0.31119200  |
| F | 3.70224400  | 1.48908900  | 4.51558400  | F | -6.56175600 | 0.61898900  | 2.39934200  |
| F | 3.72111500  | 1.97740400  | 1.92742300  | F | -5.03631900 | 1.48087900  | 4.50142500  |
| F | 1.40055300  | 2.77242700  | 0.98497200  | F | -2.32348000 | 1.10030800  | 4.44123400  |
| F | 1.79209000  | 5.27006400  | 0.16685400  | H | -1.35019200 | -0.12961900 | -0.40046800 |
| F | 3.30568300  | 5.79137700  | -2.06062700 |   |             |             |             |
| F | 4.41739700  | 3.69994900  | -3.44053200 |   |             |             |             |
| F | 4.04386600  | 1.19999800  | -2.65758400 |   |             |             |             |
| F | 2.20235400  | -2.62535300 | -1.46288700 |   |             |             |             |
| F | 5.25417400  | 0.73944100  | 0.01258900  |   |             |             |             |
| F | 7.27481800  | -0.91553800 | -0.47358100 |   |             |             |             |
| F | 6.81192900  | -3.43692700 | -1.44656800 |   |             |             |             |
| F | 4.23216600  | -4.23260500 | -1.92008200 |   |             |             |             |
| C | -2.88758900 | 6.57128300  | 1.26489500  |   |             |             |             |
| H | -3.84228100 | 6.35656400  | 1.75989800  |   |             |             |             |
| H | -2.21609200 | 6.98174500  | 2.02902600  |   |             |             |             |
| H | -3.06578700 | 7.35749400  | 0.52512200  |   |             |             |             |
| B | -2.51415600 | -1.07981500 | -0.07470900 |   |             |             |             |
| C | -1.70928700 | -2.44358900 | 0.20958400  |   |             |             |             |
| C | -1.67097700 | -3.11632200 | 1.43966100  |   |             |             |             |
| C | -0.97301000 | -3.07502400 | -0.80408200 |   |             |             |             |
| C | -0.95332400 | -4.29057600 | 1.65558200  |   |             |             |             |
| C | -0.25011200 | -4.24880500 | -0.63583900 |   |             |             |             |
| C | -0.23585200 | -4.86143500 | 0.61264400  |   |             |             |             |
| C | -3.37168600 | -1.01080600 | -1.44771000 |   |             |             |             |
| C | -3.77056600 | 0.21459400  | -1.99145000 |   |             |             |             |
| C | -3.83850300 | -2.12670800 | -2.15333900 |   |             |             |             |
| C | -4.50340800 | 0.35010000  | -3.16538000 |   |             |             |             |
| C | -4.58643800 | -2.03902300 | -3.32687100 |   |             |             |             |
| C |             |             |             | C | 3.48273600  | 1.51137600  | -1.07721500 |
|   |             |             |             | C | 3.71701000  | 1.92300400  | 0.24916600  |

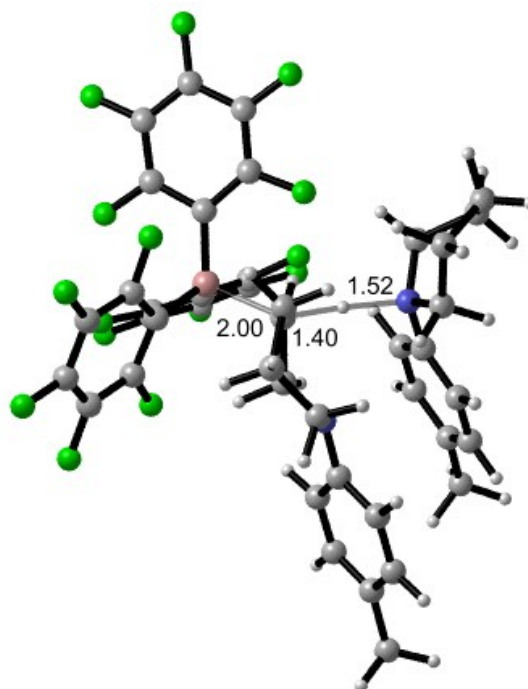

**TS<sub>14</sub>**

**G<sub>gas</sub> = -3252.083477 a.u.**

**E<sub>gas</sub> = -3252.68007541 a.u.**



|   |             |             |             |   |             |             |             |
|---|-------------|-------------|-------------|---|-------------|-------------|-------------|
| C | 4.94019000  | 2.48196700  | 0.62031600  | F | -1.09315200 | 5.33136000  | -0.05492100 |
| C | 5.98063700  | 2.67118500  | -0.29453900 | F | -0.40870400 | 2.98646300  | 0.92875600  |
| C | 5.74424600  | 2.26439200  | -1.61442400 | F | -0.18824800 | -1.96241700 | 1.37352900  |
| C | 4.53285000  | 1.70115700  | -2.00276500 | F | -2.31970200 | 2.17152200  | 2.39382300  |
| H | 2.94461700  | 1.83125100  | 1.00219200  | F | -1.69210100 | 1.84755000  | 4.93100200  |
| H | 5.07494200  | 2.79580100  | 1.65329100  | F | -0.27697000 | -0.33523900 | 5.77313000  |
| H | 6.52648700  | 2.38833900  | -2.36061100 | F | 0.47608000  | -2.23597400 | 3.92269300  |
| H | 4.40945900  | 1.38673800  | -3.03341800 | C | 7.28558400  | 3.31739400  | 0.10793000  |
| N | 2.27478000  | 0.92452500  | -1.49422900 | H | 7.31545900  | 4.37788600  | -0.17370900 |
| C | 0.10097100  | -0.19204600 | -0.97187700 | H | 7.44032100  | 3.26593800  | 1.19002600  |
| H | -0.19852800 | -1.06445600 | -0.38333800 | H | 8.14136800  | 2.83410100  | -0.37593200 |
| C | -0.30001400 | -0.04098100 | -2.45736800 | H | 0.93902500  | -1.31562700 | -1.02381900 |
| H | -1.38143000 | -0.01202300 | -2.59066700 | C | 3.08520500  | -2.13787500 | -0.26073700 |
| H | 0.05019700  | -0.88839800 | -3.05501700 | C | 2.95958000  | -2.13565900 | 1.13793400  |
| C | 0.32717100  | 1.23530900  | -3.02679100 | C | 4.04562700  | -1.81675100 | 1.95015900  |
| H | -0.09437600 | 2.11459500  | -2.53102900 | C | 5.29067900  | -1.47280300 | 1.41262100  |
| H | 0.08521700  | 1.32985700  | -4.09105700 | C | 5.40030900  | -1.45631000 | 0.01986700  |
| C | 1.84684300  | 1.24012100  | -2.87154100 | C | 4.32379000  | -1.77629500 | -0.80674500 |
| H | 2.27881500  | 0.51187000  | -3.57636200 | H | 2.01791200  | -2.37314100 | 1.61376800  |
| H | 2.23958600  | 2.22262500  | -3.16503400 | H | 3.91017700  | -1.83207600 | 3.02862900  |
| B | -1.52223500 | 0.28867400  | 0.08692800  | H | 6.34185900  | -1.17105100 | -0.44127100 |
| C | -2.72494900 | -0.82001800 | -0.14438000 | H | 4.47192400  | -1.71251700 | -1.87562000 |
| C | -3.95699400 | -0.56646700 | 0.47645800  | N | 1.92711600  | -2.46901400 | -1.09747900 |
| C | -2.69169900 | -2.03291100 | -0.82759700 | C | 2.26494800  | -2.58751900 | -2.55616500 |
| C | -5.05073300 | -1.42501700 | 0.43231500  | H | 3.23074700  | -3.09417400 | -2.66421000 |
| C | -3.75529500 | -2.93106300 | -0.90134900 | H | 2.37924700  | -1.57653500 | -2.94923500 |
| C | -4.95083700 | -2.62590600 | -0.26491100 | C | 1.21861700  | -3.39961500 | -3.32049500 |
| C | -1.90598200 | 1.76679900  | -0.49701400 | H | 1.42451000  | -3.30903500 | -4.39193100 |
| C | -1.34570500 | 2.97334100  | -0.04674600 | H | 0.22108400  | -2.98085100 | -3.15976100 |
| C | -2.84675600 | 1.94622800  | -1.52406700 | C | 1.25597000  | -4.87709200 | -2.87273000 |
| C | -1.67691400 | 4.23039800  | -0.54541400 | H | 1.97374500  | -5.43976300 | -3.47966700 |
| C | -3.21014500 | 3.18353300  | -2.05274300 | H | 0.27584100  | -5.33569900 | -3.03923200 |
| C | -2.62324100 | 4.34116700  | -1.55802000 | C | 1.64652300  | -4.96801600 | -1.38120700 |
| C | -1.15805000 | 0.19648400  | 1.69052200  | H | 2.73028600  | -5.08914000 | -1.26704800 |
| C | -0.52257300 | -0.93378000 | 2.21010200  | H | 1.18876700  | -5.84296000 | -0.90817900 |
| C | -1.57470700 | 1.09437700  | 2.68601500  | C | 1.20185800  | -3.71454800 | -0.62546100 |
| C | -0.19291800 | -1.13384700 | 3.54452500  | H | 0.13336300  | -3.55168100 | -0.76561200 |
| C | -1.28109800 | 0.93547300  | 4.04169400  | H | 1.37623800  | -3.82789300 | 0.44026000  |
| C | -0.57233400 | -0.17803300 | 4.47936700  | C | 6.45347100  | -1.08667800 | 2.29347000  |
| F | -1.56988000 | -2.42696200 | -1.49568200 | H | 6.57483900  | 0.00301800  | 2.31802100  |
| F | -3.62625400 | -4.08006900 | -1.58152100 | H | 6.30870200  | -1.42790800 | 3.32241700  |
| F | -5.98647200 | -3.46973400 | -0.31933500 | H | 7.39413300  | -1.50875500 | 1.92524900  |
| F | -6.19384100 | -1.10734900 | 1.05266700  | C | 1.21564400  | 0.75254500  | -0.48439100 |
| F | -4.13104900 | 0.57958800  | 1.16472400  | H | 0.82260500  | 1.72434100  | -0.18358200 |
| F | -3.46538700 | 0.88931800  | -2.09866700 | H | 1.67542000  | 0.31486100  | 0.40373200  |
| F | -4.11601500 | 3.26093800  | -3.03693300 |   |             |             |             |
| F | -2.95294300 | 5.53749400  | -2.05321300 |   |             |             |             |

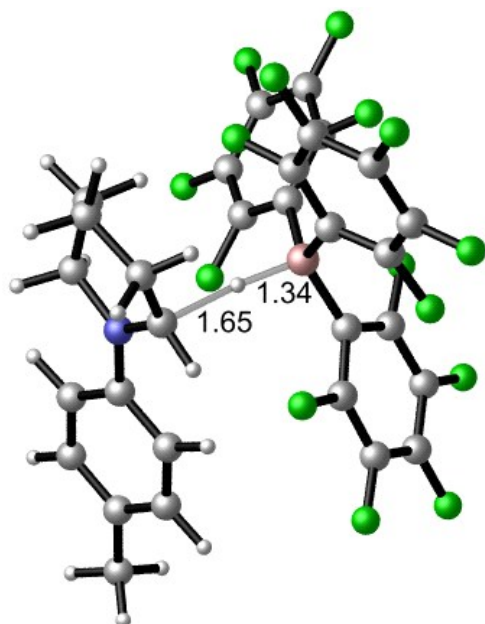

**TS<sub>15</sub>**

**G<sub>gas</sub> = -2730.121593 a.u.**

**E<sub>gas</sub> = -2730.46276222 a.u.**

|   |             |             |             |
|---|-------------|-------------|-------------|
| C | 2.98874800  | 0.83469700  | -1.98028800 |
| C | 3.34274700  | -0.49376500 | -1.69237500 |
| C | 4.65963200  | -0.82066100 | -1.39125900 |
| C | 5.67643100  | 0.14432700  | -1.36713500 |
| C | 5.31391100  | 1.45962900  | -1.66572800 |
| C | 3.99706900  | 1.80802000  | -1.96610200 |
| H | 2.61213600  | -1.29008500 | -1.68577100 |
| H | 4.89589800  | -1.85732300 | -1.16583500 |
| H | 6.07137000  | 2.23869100  | -1.66572400 |
| H | 3.78201300  | 2.84326200  | -2.19390900 |
| N | 1.64431700  | 1.20389400  | -2.32986300 |
| C | 0.65620000  | 0.30847800  | -2.43214400 |
| H | 0.95433900  | -0.72720100 | -2.37742300 |
| C | -0.82368500 | 2.06010800  | -3.58731400 |
| H | -1.90179400 | 2.23264900  | -3.61097700 |
| H | -0.42746900 | 2.34415700  | -4.56934400 |
| C | -0.16848600 | 2.91968100  | -2.50704700 |
| H | -0.63166200 | 2.71125100  | -1.53877600 |
| H | -0.30981000 | 3.98593900  | -2.71044800 |
| C | 1.33153900  | 2.65150500  | -2.43374000 |
| H | 1.83721700  | 3.04566300  | -3.32342900 |
| H | 1.75756300  | 3.13587200  | -1.55248700 |

|   |             |             |             |
|---|-------------|-------------|-------------|
| C | 7.09536000  | -0.22647000 | -1.01304000 |
| H | 7.19878400  | -0.40607800 | 0.06393300  |
| H | 7.40816500  | -1.14310800 | -1.52350900 |
| H | 7.79596200  | 0.56818300  | -1.28334900 |
| B | -0.69106500 | -0.23128200 | 0.17109600  |
| C | -2.11777300 | -0.80511900 | -0.36184200 |
| C | -2.56692500 | -2.12541600 | -0.23243100 |
| C | -3.02373500 | 0.03790900  | -1.01925400 |
| C | -3.79955900 | -2.57282700 | -0.71089700 |
| C | -4.25845300 | -0.36231200 | -1.51630800 |
| C | -4.65283700 | -1.68799400 | -1.35946400 |
| C | -0.78107300 | 1.17327900  | 0.99344500  |
| C | 0.32018000  | 2.02553700  | 1.07765400  |
| C | -1.89930800 | 1.61119700  | 1.71015100  |
| C | 0.32767200  | 3.23650100  | 1.76250900  |
| C | -1.93864400 | 2.81044500  | 2.41967200  |
| C | -0.81749200 | 3.63424200  | 2.44456000  |
| C | 0.30211700  | -1.31336200 | 0.87852300  |
| C | 0.93194300  | -2.32721500 | 0.15615200  |
| C | 0.61144900  | -1.31690300 | 2.24298100  |
| C | 1.83892700  | -3.23376100 | 0.68766900  |
| C | 1.50174400  | -2.21738400 | 2.83131800  |
| C | 2.12795600  | -3.17969000 | 2.04845100  |
| F | -2.70957200 | 1.34513000  | -1.20883500 |
| F | -5.06283800 | 0.50897100  | -2.14291600 |
| F | -5.83349000 | -2.10317500 | -1.82956500 |
| F | -4.16596800 | -3.85120300 | -0.54938800 |
| F | -1.82448000 | -3.05870200 | 0.39317500  |
| F | -3.01796300 | 0.86217500  | 1.76256700  |
| F | -3.04539200 | 3.17529300  | 3.08128300  |
| F | -0.84076700 | 4.79293500  | 3.11314300  |
| F | 1.42214400  | 4.01497300  | 1.76589600  |
| F | 1.47885800  | 1.68877700  | 0.45534600  |
| F | 0.68000800  | -2.46283400 | -1.17786000 |
| F | 0.04283600  | -0.43254800 | 3.08530000  |
| F | 1.75760100  | -2.15899800 | 4.14500600  |
| F | 2.99538400  | -4.04131900 | 2.59124800  |
| F | 2.43908800  | -4.14473600 | -0.09519500 |
| H | -0.06300800 | 0.11099200  | -0.96172100 |
| C | -0.53679400 | 0.57152800  | -3.31652000 |
| H | -0.30844800 | 0.04643400  | -4.25538900 |
| H | -1.39839200 | 0.05184600  | -2.89631600 |

## References

- (1) Frisch, M. J. *et. al.* Wallingford CT, **2016**.
- (2) (a) A. D. Becke, *J. Chem. Phys.*, 1993, **98**, 5648–5652; (b) P. J. Stephens, F. J. Devlin, C. F. Chabalowski and M. J. Frisch, *J. Phys. Chem.*, 1994, **98**, 11623–11627.
- (3) G. A. Petersson, A. Bennett, T. G. Tensfeldt, M. A. Al-Laham, W. A. Shirley and J. A. Mantzaris, *J. Chem. Phys.*, 1988, **89**, 2193–2218.
- (4) C. Gonzalez and H. B. Gonzalez, *J. Phys. Chem.*, 1990, **94**, 5523–5527.
- (5) A. V. Marenich, C. J. Cramer and D. G. Truhlar, *J. Phys. Chem. B.*, 2009, **113**, 6378–6396.
- (6) (a) S. Grimme, J. Antony, S. Ehrlich and H. J. Krieg, *Chem. Phys.*, 2010, **132**, 154104; (b) S. Grimme, S. Ehrlich and L. J. Goerigk, *Comput. Chem.*, 2011, **32**, 1456–1465.
- (7) CYLview, 1.0b; C. Y. Legault, Université de Sherbrooke, **2009** (<http://www.cylview.org>).
